# Supplementary material for: Epigenetic regulation of Wnt7b expression by the cis-acting long noncoding RNA Lnc-Rewind in muscle stem cells
Source: eLife. 2021 Jan 12;10:e54782. doi: 10.7554/eLife.54782 (PMC7837680; doi:10.7554/eLife.54782)
Supplement: Figure 1—figure supplement 1—source data 1. [file elife-54782-fig1-figsupp1-data1.xlsx]

## Sheet: Sheet1
1D	GM-DM													ttest
	C2C12		Sample	Ct-GOI	Ct-GAPDH			relative quantity-GOI	relative quantity-GAPDH		relative quantity			0.195412
	Myog	rep1	Wt GM	31.4845	17.0005			3.3283e-10	7.627e-06		4.36384e-05		1
		rep2	Wt GM	34.6684	17.245			3.66252e-11	6.43798e-06		5.68893e-06		1			GM	DM
		rep3	Wt GM	32.5233	16.8759			1.61995e-10	8.31457e-06		1.94833e-05		1		Average	1	10540.7
		rep1	Wt DM	19.7742	16.1002			1.11528e-06	1.4235e-05		0.0783479		1795.39		SEM	0	6787.28
		rep2	Wt DM	18.8373	15.9589			2.13505e-06	1.56999e-05		0.135991		23904.6
		rep3	Wt DM	18.8875	15.7721			2.06199e-06	1.78704e-05		0.115386		5922.28
														ttest
			Sample	Ct-GOI	Ct-GAPDH			relative quantity-GOI	relative quantity-GAPDH		relative quantity			0.00208944
	Mck	rep1	Wt GM	35.7743	16.8088			1.70165e-11	8.71049e-06		1.95357e-06		1			GM	DM
		rep2	Wt GM	36.5105	16.7959			1.02149e-11	8.78881e-06		1.16226e-06		1		Average	1	73988.2
		rep3	Wt GM	36.1655	16.8142			1.2975e-11	8.67811e-06		1.49515e-06		1		SEM	0	10435.3
		rep1	Wt DM	19.8967	16.7121			1.02448e-06	9.31422e-06		0.10999		56302.4
		rep2	Wt DM	19.9237	16.7051			1.0055e-06	9.36004e-06		0.107425		92427.6
		rep3	Wt DM	19.6058	16.4147			1.25337e-06	1.14467e-05		0.109496		73234.6
1D	GM-DM
	MuSCs Wt		Sample	Ct1-GOI	Ct2-GOI	Cm-GOI	Ct1-GAPDH	Ct2-GAPDH	Cm-GAPDH	ΔCt	ΔΔCt			fold change
														MyoG
	Myog	GM 01-02-18	Wt GM	21.5047	21.9978	21.7512	16.9814	16.9835	16.9824	4.76879	0		GM	1
		DM 01-02-18	Wt DM	19.8441	20.1438	19.994	16.9348	16.9618	16.9483	3.04564	-1.72315		DM	3.30156
		GM 7-02-19	Wt GM	25.9945	29.6019	27.7982	19.4526	19.7105	19.5815	8.21666	0		GM	1
		DM 7-02-19	Wt DM	23.7688	24.6505	24.2096	17.7317	17.6618	17.6968	6.51286	-1.7038		DM	3.25757
		GM 25-03-19	Wt GM	27.4592	30.3686	28.9139	17.7524	17.8403	17.7964	11.1175	0		GM	1
		DM 25-03-19	Wt DM	28.2601	30.9137	29.5869	19.0541	19.1632	19.1087	10.4782	-0.639319		DM	1.55759
															ttest
															0.0411154
														MCK
	Mck	GM 01-02-18	Wt GM	28.7394	28.4293	28.5844	16.9814	16.9835	16.9824	11.602	0		GM	1
		DM 01-02-18	Wt DM	23.1066	22.256	22.6813	16.9348	16.9618	16.9483	5.73299	-5.86896		DM	58.4432
		GM 7-02-19	Wt GM	32.0234	33.3289	32.6762	19.4526	19.7105	19.5815	13.0946	0		GM	1
		DM 7-02-19	Wt DM	24.1534	24.044	24.0987	17.7317	17.6618	17.6968	6.40195	-6.69267		DM	103.441
		GM 25-03-19	Wt GM	33.0018	35.2321	34.1169	17.7524	17.8403	17.7964	16.3206	0		GM	1
		DM 25-03-19	Wt DM	27.0703	27.029	27.0496	19.0541	19.1632	19.1087	7.94097	-8.3796		DM	333.05
															ttest
															0.126049
