# Supplementary material for: Epigenetic regulation of Wnt7b expression by the cis-acting long noncoding RNA Lnc-Rewind in muscle stem cells
Source: eLife. 2021 Jan 12;10:e54782. doi: 10.7554/eLife.54782 (PMC7837680; doi:10.7554/eLife.54782)
Supplement: Figure 1—source data 1. [file elife-54782-fig1-data1.xlsx]

## Sheet: Sheet1
1C
GM-DM
MuSCs Wt		Sample	Ct-GOI	Ct-GAPDH			relative quantity-GOI	relative quantity-GAPDH		relative quantity
Lnc-Rewind	rep1	Wt GM	24.3332	17.4148			4.73127e-08	5.72283e-06		0.00826736
	rep2	Wt GM	27.23	19.5815			6.35277e-09	1.27458e-06		0.00498422				GM	DM		ttest
	rep3	Wt GM	25.6735	17.7964			1.86855e-08	4.39295e-06		0.00425352			Average	0.00583503	0.00140479		0.0259713
	rep1	Wt DM	26.8668	17.3491			8.17102e-09	5.9895e-06		0.00136422			SEM	0.00123432	0.000349409
	rep2	Wt DM	26.6416	17.6968			9.55165e-09	4.70698e-06		0.00202925
	rep3	Wt DM	29.3592	19.1087			1.45214e-09	1.76895e-06		0.000820906
GM-DM
C2C12		Sample	Ct-GOI	Ct-GAPDH			relative quantity-GOI	relative quantity-GAPDH		relative quantity
Lnc-Rewind	rep1	Wt GM	28.6076	16.8088			2.44484e-09	8.71049e-06		0.000280677
	rep2	Wt GM	28.9325	16.6709			1.9519e-09	9.58432e-06		0.000203656				GM	DM		ttest
	rep3	Wt GM	29.1122	16.5819			1.72327e-09	1.01945e-05		0.000169039			Average	0.000217791	4.917e-05		0.0267943
	rep1	Wt DM	29.7075	16.7121			1.14063e-09	9.31422e-06		0.000122461			SEM	3.2993e-05	3.66496e-05
	rep2	Wt DM	32.9906	16.8077			1.17173e-10	8.71708e-06		1.34418e-05
	rep3	Wt DM	33.3028	16.9081			9.43771e-11	8.13116e-06		1.16068e-05
