# Supplementary material for: Epigenetic regulation of Wnt7b expression by the cis-acting long noncoding RNA Lnc-Rewind in muscle stem cells
Source: eLife. 2021 Jan 12;10:e54782. doi: 10.7554/eLife.54782 (PMC7837680; doi:10.7554/eLife.54782)
Supplement: Figure 2—figure supplement 1—source data 1. [file elife-54782-fig2-figsupp1-data1.xlsx]

## Sheet: Sheet1
2A
	Ct lnc-rewind	Ct Gapdh	ΔCt	ΔΔCt		Sample	fold change
							LncRewind
	29.1513	16.9288	12.2225	0	Rep1	WT1 scr	1
	31.631	17.7976	13.8334	1.61096		WT1 KD	0.32738
lnc-REWIND spliced	27.8194	18.4272	9.39224	0	Rep2	WT2 scr	1					SCR	KD
	27.9701	17.5229	10.4472	1.05492		WT2 KD	0.481324				rep1	1	0.32738	ttest
	26.4975	17.3452	9.15228	0	Rep3	WT3 scr	1				rep2	1	0.481324	7.08404e-06
	28.5128	17.8837	10.6292	1.47688		WT3 KD	0.359265				rep3	1	0.359265
	30.1133	17.0386	13.0747	0	Rep4	WT4 scr	1				rep4	1	0.270456
	32.8028	17.8415	14.9613	1.88654		WT4 KD	0.270456
	Ct lnc-rewind	Ct Gapdh	ΔCt	ΔΔCt		Sample	fold change
							LncRewind
	26.4216	18.734	7.68768	0	Rep1	WT1 scr	1
	28.4295	19.7725	8.65698	0.969305		WT1 KD	0.510752					SCR	KD
lnc-REWIND unspliced	27.0358	19.2727	7.76306	0	Rep2	WT2 scr	1				rep1	1	0.510752	ttest
	29.5954	20.6999	8.8955	1.13244		WT2 KD	0.456145				rep2	1	0.456145	0.000564258
	27.9846	19.4968	8.48779	0	Rep3	WT3 scr	1				rep3	1	0.617076
	28.9343	19.75	9.18427	0.69648		WT3 KD	0.617076
2D
GAP-SCR/GAP-REW
		Sample	Ct-GOI	Ct-GAPDH			relative quantity-GOI	relative quantity-GAPDH		relative quantity
mirLet7b	rep1	GAP-SCR	17.4692	20.8404			5.51106e-06	5.3262e-07		10.3471		1
	rep2	GAP-SCR	17.2859	20.5376			6.25806e-06	6.57023e-07		9.52487		1			GM	DM		ttest
	rep3	GAP-SCR	17.8269	20.6418			4.30104e-06	6.11235e-07		7.03664		1		Average	1	0.646648		0.00452978
	rep1	GAP-REW	18.4058	20.8518			2.87935e-06	5.28436e-07		5.44882		0.526605		SEM	0	0.0614315
	rep2	GAP-REW	17.8289	20.6252			4.29515e-06	6.1829e-07		6.94682		0.729336
	rep3	GAP-REW	18.7232	20.9902			2.31077e-06	4.80101e-07		4.81309		0.684003
		Sample	Ct-GOI	Ct-GAPDH			relative quantity-GOI	relative quantity-GAPDH		relative quantity
miRLet7c	rep1	GAP-SCR	16.9921	20.884			7.67122e-06	5.16757e-07		14.8449		1
	rep2	GAP-SCR	16.7713	20.7358			8.93967e-06	5.72681e-07		15.6102		1			GM	DM		ttest
	rep3	GAP-SCR	17.2263	20.6418			6.52171e-06	6.11235e-07		10.6697		1		Average	1	0.709638		0.00359141
	rep1	GAP-REW	17.6363	20.9093			4.9084e-06	5.07778e-07		9.66643		0.651161		SEM	0	0.0473771
	rep2	GAP-REW	17.19	20.8387			6.68799e-06	5.3325e-07		12.5419		0.803445
	rep3	GAP-REW	18.1432	20.9902			3.45419e-06	4.80101e-07		7.1947		0.67431
2F
MuSCs Wt				2018-10-10	2018-10-10	2018-10-18	2018-10-18	2018-12-04	2018-12-04
Media Dapi Scr/KD				Wt2 Scr	Wt2 KD023	Wt Scr 1 e 2	Wt KD023	Wt Scr	Wt KD023					Scr	KD023	mean KD	dev st	SEM		Scr	100
				Dapi	Dapi	Dapi	Dapi	Dapi	Dapi			%		100	59.9699	52.3437	9.67989	5.58869		KD023	52.3437
			foto1	156	42	26	103	559	598					100	41.4538						0
			foto2	200	205	79	50	683	630					100	55.6074		t.test			SEM	5.58869
			foto3	183	214	83	55	709	663								0.00103778	**
			foto4	135	145	140	100	607	330
			foto5	76	80	155	69	432	210
			foto6	190	133	153	72	479	221
			foto7	692	51	97	42	848	163
			foto8	265	40	76	69	714	268
			foto9	99	115	90	47	442	254
			foto10		172	47	115	528
			foto11			22	72
			foto12			85	50
			foto13			73
			foto14			223
			foto15			313
			foto16			236
			foto17			138
			TOT	1996	1197	2036	844	6001	3337
			%	100	59.9699	100	41.4538	100	55.6074
