# Supplementary material for: Epigenetic regulation of Wnt7b expression by the cis-acting long noncoding RNA Lnc-Rewind in muscle stem cells
Source: eLife. 2021 Jan 12;10:e54782. doi: 10.7554/eLife.54782 (PMC7837680; doi:10.7554/eLife.54782)
Supplement: Figure 2—source data 1. [file elife-54782-fig2-data1.xlsx]

## Sheet: Sheet1
Figure 2-Source Data 1 . List of the Differentially Expressed Genes (DEGs) between GAP-SCR and GAP-REW transfected MuSCs.
EnsemblGeneID	Gene Symbol	SCRexp1	SCRexp2	SCRexp3	SCRexp4	GAPexp1	GAPexp2	GAPexp3	GAPexp4	logFC_EXPvsCTR	p-value
ENSMUSG00000071342	Lsmem1	6.27	0	0	0	180.85	131.04	175.86	35.95	6.978	0.0291369
ENSMUSG00000047953	Gp5	0	11.62	0	0	25.98	56.16	52.02	63.31	6.141	0.00960721
ENSMUSG00000097527	1700112J16Rik	0	0	0	9.96	15.59	35.57	61.92	32.83	5.789	0.0444855
ENSMUSG00000073758	Sh3d21	1.39	0	9.71	0	25.98	29.95	22.29	47.68	4.727	0.0292452
ENSMUSG00000050357	Carmil2	5.57	0	0	0	22.87	16.85	3.72	15.63	4.666	0.0257322
ENSMUSG00000100394	Gm28791	7.66	0	0	1.81	64.44	29.95	40.87	11.72	4.493	0.0396785
ENSMUSG00000082575	Gm13050	0	5.81	0	2.72	12.47	41.18	16.1	16.41	3.991	0.0364686
ENSMUSG00000029864	Gstk1	0	0.97	1.21	9.06	23.91	5.62	33.44	47.68	3.845	0.0434422
ENSMUSG00000045464	2810002D19Rik	4.18	0	23.07	3.62	22.87	74.88	99.08	61.75	3.631	0.0238265
ENSMUSG00000097842	9330104G04Rik	3.48	0	10.93	9.06	37.42	48.67	73.07	45.33	3.501	0.00605415
ENSMUSG00000035237	Lcat	7.66	0.97	0	0.91	18.71	9.36	18.58	19.54	3.457	0.0124359
ENSMUSG00000054161	Fam83e	6.27	0	19.43	15.4	65.48	50.54	50.78	143.82	3.365	0.0499448
ENSMUSG00000022802	Lmln	24.37	0	7.29	14.49	68.6	87.98	137.47	49.24	3.319	0.042923
ENSMUSG00000074743	Thbd	13.92	0	1.21	15.4	44.69	41.18	18.58	74.25	3.248	0.0241299
ENSMUSG00000027313	Chac1	20.19	0	2.43	0.91	37.42	3.74	27.25	20.32	3.058	0.0357889
ENSMUSG00000079737	3110001I22Rik	5.57	0	10.93	0	27.02	1.87	26.01	22.67	3.017	0.0491967
ENSMUSG00000027329	Spef1	13.23	10.65	3.64	2.72	37.42	82.37	39.63	57.06	2.992	0.0209426
ENSMUSG00000032128	Robo3	6.96	0	7.29	14.49	19.75	65.52	49.54	59.4	2.94	0.03175
ENSMUSG00000018774	Cd68	10.44	27.11	2.43	5.44	58.2	102.96	34.68	67.22	2.865	0.0101075
ENSMUSG00000033900	Map9	4.18	0	23.07	18.12	35.34	41.18	81.74	46.9	2.823	0.00981746
ENSMUSG00000029102	Hgfac	4.18	0	0	0	7.28	3.74	3.72	0.78	2.747	0.0272049
ENSMUSG00000106019	Gm43672	7.66	0	24.29	3.62	18.71	44.93	58.21	28.14	2.656	0.0283633
ENSMUSG00000101814	Gm17807	0.7	0	1.21	1.81	5.2	5.62	7.43	4.69	2.62	0.00724687
ENSMUSG00000086075	Gm15728	4.18	12.59	20.64	3.62	70.68	16.85	79.26	54.71	2.574	0.0482964
ENSMUSG00000029075	Tnfrsf4	2.78	9.68	2.43	3.62	35.34	29.95	9.91	25.79	2.498	0.0278775
ENSMUSG00000025408	Ddit3	128.1	84.23	153.01	58.88	657.91	436.17	839.69	235.27	2.297	0.0288831
ENSMUSG00000024268	Celf4	138.55	0.97	30.36	132.26	338.83	194.68	174.63	203.22	2.294	0.0145693
ENSMUSG00000042286	Stab1	6.27	0.97	3.64	0	20.79	3.74	11.15	7.03	2.286	0.0467566
ENSMUSG00000078517	Emc1	271.52	18.4	89.86	274.49	646.48	973.42	556.08	544.79	2.27	0.042158
ENSMUSG00000020937	Plcd3	33.42	0	25.5	9.06	55.09	35.57	43.35	60.19	2.218	0.0249927
ENSMUSG00000035954	Dock4	26.46	0	1.21	4.53	33.26	5.62	16.1	12.51	2.185	0.0239689
ENSMUSG00000005718	Tfap4	19.49	0	6.07	16.31	40.53	9.36	39.63	35.95	2.139	0.0244023
ENSMUSG00000036845	Lin37	4.87	10.65	13.36	1.81	22.87	28.08	32.2	28.14	2.104	0.00233656
ENSMUSG00000098234	Snhg6	89.81	52.28	105.65	50.73	328.44	308.88	512.73	164.92	2.096	0.0241071
ENSMUSG00000069114	Zbtb10	36.2	16.46	30.36	32.61	135.12	151.63	99.08	93.8	2.055	0.0124024
ENSMUSG00000023952	Gtpbp2	30.63	40.66	19.43	3.62	89.38	138.53	126.32	17.98	2.043	0.0461723
ENSMUSG00000034686	Prr7	10.44	0.97	6.07	4.53	24.94	24.34	18.58	12.51	2.03	0.020266
ENSMUSG00000031409	Tceal6	23.67	18.4	23.07	8.15	92.5	67.39	59.45	60.19	1.999	0.0045215
ENSMUSG00000037325	Bbs7	14.62	0	17	28.99	48.85	33.7	28.48	60.19	1.992	0.0146453
ENSMUSG00000051817	Sox12	25.76	20.33	26.72	12.68	112.25	44.93	105.27	84.42	1.991	0.0182523
ENSMUSG00000034826	Nup54	9.75	65.84	9.71	23.55	100.82	162.86	79.26	30.48	1.986	0.0489288
ENSMUSG00000031976	Urb2	11.14	56.16	14.57	2.72	28.06	101.09	65.64	43.77	1.968	0.0142258
ENSMUSG00000041488	Stx3	25.06	43.57	30.36	3.62	72.75	59.9	110.22	76.6	1.927	0.0327677
ENSMUSG00000019997	Ctgf	236.71	55.19	127.51	85.16	696.37	599.03	273.7	281.39	1.92	0.0408942
ENSMUSG00000028878	Fam76a	28.54	2.9	41.29	8.15	78.99	24.34	111.46	34.39	1.919	0.0338325
ENSMUSG00000033033	Calhm2	9.05	30.98	3.64	9.96	32.22	54.29	47.06	32.05	1.913	0.0122055
ENSMUSG00000039662	Icmt	18.8	14.52	29.14	45.3	45.73	110.45	115.18	121.15	1.877	0.0187637
ENSMUSG00000030717	Nupr1	93.99	21.3	44.93	12.68	188.12	82.37	156.05	93.01	1.871	0.00383095
ENSMUSG00000020886	Dlg4	20.19	0	20.64	23.55	34.3	22.46	44.59	52.37	1.759	0.00530758
ENSMUSG00000041012	Cmtm8	1.39	0.97	0	7.25	6.24	3.74	2.48	10.16	1.74	0.00917154
ENSMUSG00000079179	Rab10os	19.49	6.78	20.64	2.72	35.34	39.31	52.02	14.85	1.736	0.0220495
ENSMUSG00000101013	A630072M18Rik	13.23	0	15.79	20.84	31.18	26.21	19.82	46.12	1.734	0.0371591
ENSMUSG00000030521	Mphosph10	26.46	27.11	99.58	57.07	108.09	160.99	188.25	160.23	1.733	0.00310068
ENSMUSG00000026696	Vamp4	13.92	25.17	15.79	28.08	58.2	89.85	56.97	65.66	1.732	0.00450547
ENSMUSG00000097195	Snhg5	135.76	97.79	177.3	109.61	323.24	600.9	453.28	363.46	1.727	0.0211678
ENSMUSG00000028914	Casp9	22.97	15.49	49.79	43.48	124.72	119.81	96.6	66.44	1.715	0.0424146
ENSMUSG00000038524	Fchsd1	4.87	28.08	2.43	9.06	21.83	46.8	11.15	32.83	1.686	0.0121341
ENSMUSG00000018405	Mrm1	21.58	39.7	10.93	39.86	54.05	108.57	91.65	85.2	1.684	0.0139095
ENSMUSG00000059820	AU019823	54.3	21.3	47.36	41.67	146.55	87.98	201.87	96.14	1.681	0.0257818
ENSMUSG00000002221	Paxip1	23.67	61.97	27.93	18.12	96.66	116.06	78.02	75.04	1.607	0.00135739
ENSMUSG00000021504	B4galt7	38.99	33.89	60.72	50.73	136.16	155.37	134.99	125.06	1.604	0.0038608
ENSMUSG00000038646	Fam103a1	41.08	53.25	75.29	20.84	103.94	198.43	232.83	57.84	1.581	0.0433896
ENSMUSG00000032035	Ets1	32.03	37.76	46.15	40.77	77.95	194.68	96.6	118.81	1.557	0.0484504
ENSMUSG00000020160	Meis1	20.89	14.52	8.5	1.81	25.98	35.57	26.01	17.98	1.528	0.0225731
ENSMUSG00000021466	Ptch1	16.01	49.38	24.29	14.49	60.28	127.29	82.98	30.48	1.525	0.0325944
ENSMUSG00000046949	Nqo2	60.57	3.87	37.64	69.75	89.38	89.85	105.27	90.67	1.514	0.0467206
ENSMUSG00000082193	Rpl5-ps1	13.92	8.71	4.86	9.96	36.38	16.85	22.29	30.48	1.512	0.0124411
ENSMUSG00000025026	Add3	11.84	10.65	7.29	5.44	32.22	35.57	22.29	13.29	1.506	0.0188778
ENSMUSG00000035969	Rusc2	36.9	34.86	38.86	62.51	173.57	123.55	108.99	86.76	1.502	0.0413399
ENSMUSG00000070834	Gm13015	15.32	56.16	35.22	17.21	51.97	160.99	73.07	56.28	1.502	0.0471465
ENSMUSG00000025464	Paox	21.58	36.79	8.5	25.37	76.91	61.78	50.78	49.24	1.494	0.0165922
ENSMUSG00000027200	Sema6d	13.23	59.06	17	24.46	55.09	110.45	47.06	69.56	1.47	0.00254438
ENSMUSG00000003352	Cacnb3	36.9	14.52	10.93	8.15	53.01	54.29	38.39	25.79	1.455	0.0190058
ENSMUSG00000074578	Zfas1	652.35	639.02	879.19	797.2	1928	2059.17	2900.51	1382.7	1.441	0.0205383
ENSMUSG00000024270	Slc39a6	213.74	181.05	119.01	163.97	513.44	604.65	593.23	225.11	1.44	0.0419664
ENSMUSG00000072969	Armcx5	50.82	73.58	100.79	34.42	92.5	265.82	262.56	107.86	1.433	0.0460263
ENSMUSG00000054871	Tmem158	346.02	248.83	383.74	217.42	1228.51	769.38	705.93	544.01	1.414	0.0299482
ENSMUSG00000001052	Sec24b	41.08	11.62	47.36	76.1	65.48	67.39	156.05	138.35	1.404	0.03652
ENSMUSG00000020176	Grb10	399.62	79.39	64.36	109.61	616.34	383.75	294.76	166.49	1.403	0.0303311
ENSMUSG00000042650	Alkbh5	119.05	162.66	281.73	136.79	399.11	698.24	542.45	231.36	1.384	0.0487355
ENSMUSG00000006335	Tfpt	25.06	8.71	15.79	18.12	35.34	28.08	56.97	53.15	1.382	0.0334382
ENSMUSG00000040435	Ppp1r15a	240.19	149.1	206.44	149.47	702.6	299.52	687.35	350.95	1.381	0.0328532
ENSMUSG00000098332	2310009A05Rik	16.01	7.75	27.93	44.39	58.2	33.7	37.15	101.61	1.376	0.0474236
ENSMUSG00000069125	Rps24-ps2	1.39	0.97	4.86	1.81	3.12	3.74	7.43	7.82	1.357	0.0401684
ENSMUSG00000021948	Prkcd	19.49	19.36	23.07	41.67	47.81	54.29	71.83	82.85	1.341	0.00311913
ENSMUSG00000002825	Qtrt1	103.04	66.81	97.15	86.06	230.74	179.71	180.82	314.21	1.336	0.0217453
ENSMUSG00000085272	Sbk3	89.81	25.17	60.72	55.26	166.3	147.89	191.96	69.56	1.335	0.0487852
ENSMUSG00000020527	Myo19	23.67	23.24	31.57	12.68	50.93	63.65	78.02	35.95	1.332	0.008063
ENSMUSG00000030735	Gm9755	41.08	29.05	57.07	40.77	109.13	101.09	84.22	121.15	1.331	0.0136957
ENSMUSG00000041328	Pcf11	92.6	131.68	94.72	68.85	179.81	357.55	229.12	218.86	1.331	0.0138933
ENSMUSG00000020018	Snrpf	93.29	136.52	77.72	80.63	315.96	299.52	243.98	139.13	1.33	0.0210073
ENSMUSG00000101970	1810026B05Rik	22.97	39.7	57.07	28.99	41.57	119.81	97.84	125.06	1.329	0.0451867
ENSMUSG00000035370	Adat3	19.49	0	13.36	15.4	40.53	3.74	24.77	25.01	1.299	0.0497893
ENSMUSG00000034401	Spata6	22.97	0	2.43	19.02	34.3	1.87	11.15	25.79	1.283	0.0370804
ENSMUSG00000045975	C2cd2	28.54	4.84	31.57	14.49	33.26	41.18	50.78	38.3	1.27	0.0485939
ENSMUSG00000023572	Ccndbp1	57.09	47.44	26.72	40.77	74.83	151.63	101.56	84.42	1.249	0.0492269
ENSMUSG00000031015	Swap70	17.41	31.95	26.72	16.31	28.06	65.52	64.4	64.87	1.238	0.0264284
ENSMUSG00000026578	Ccdc181	21.58	77.46	57.07	15.4	63.4	166.61	94.12	46.12	1.227	0.0337667
ENSMUSG00000026426	Arl8a	77.98	99.73	179.72	134.07	196.44	308.88	267.51	335.32	1.211	0.0144976
ENSMUSG00000031530	Dusp4	45.25	44.54	36.43	28.08	91.46	117.93	100.32	55.5	1.21	0.013829
ENSMUSG00000001627	Ifrd1	1505.2	1035.01	1868.89	1439.49	3533.8	3659.7	3353.79	2768.52	1.205	0.0078846
ENSMUSG00000010067	Rassf1	184.49	292.4	357.02	310.73	466.67	763.76	746.8	622.96	1.194	0.00332361
ENSMUSG00000034412	Tbc1d10a	34.11	5.81	38.86	23.55	55.09	39.31	74.31	37.52	1.193	0.0148483
ENSMUSG00000101567	Txn-ps1	57.79	128.77	241.66	85.16	279.59	351.93	377.74	115.68	1.192	0.0439463
ENSMUSG00000019774	Mtrf1l	17.41	25.17	13.36	13.59	43.65	41.18	26.01	44.55	1.171	0.0153218
ENSMUSG00000026634	Angel2	110	110.38	65.58	77	180.85	273.31	221.69	146.95	1.17	0.0209641
ENSMUSG00000037434	Slc30a1	61.96	40.66	49.79	27.18	117.45	144.14	84.22	61.75	1.165	0.0393766
ENSMUSG00000078671	Chd2	221.39	243.99	229.51	146.76	269.19	615.88	484.24	575.28	1.164	0.0465478
ENSMUSG00000007570	Fance	64.75	46.47	76.5	97.84	133.04	138.53	191.96	154.76	1.141	0.00775421
ENSMUSG00000017119	Nbr1	137.15	117.15	229.51	156.72	318.04	419.32	404.98	258.72	1.141	0.0194639
ENSMUSG00000056708	Ier5	293.1	160.72	129.94	182.99	402.23	516.66	407.46	311.09	1.13	0.0353081
ENSMUSG00000000078	Klf6	356.46	268.19	325.45	346.06	875.13	649.57	728.22	594.82	1.126	0.00595755
ENSMUSG00000081715	Rps11-ps3	20.89	3.87	20.64	24.46	30.14	28.08	34.68	39.86	1.124	0.0150685
ENSMUSG00000060404	Olfr1369-ps1	66.84	56.16	57.07	87.87	199.56	93.6	125.09	181.34	1.124	0.0260699
ENSMUSG00000071151	Gm4799	24.37	49.38	34	38.95	40.53	121.68	91.65	79.73	1.121	0.0303894
ENSMUSG00000045411	2410002F23Rik	185.19	109.41	195.51	228.29	383.52	243.36	454.52	481.48	1.12	0.00541849
ENSMUSG00000049858	Suox	34.11	36.79	53.43	0.91	40.53	48.67	74.31	27.36	1.104	0.0352347
ENSMUSG00000085787	Gm13092	133.67	52.28	161.51	54.35	344.03	132.91	239.03	121.93	1.104	0.0487099
ENSMUSG00000028893	Sesn2	37.6	10.65	31.57	56.17	84.19	43.06	50.78	89.11	1.102	0.00988506
ENSMUSG00000063838	Cdc42ep5	24.37	15.49	6.07	12.68	27.02	35.57	22.29	30.48	1.096	0.0364216
ENSMUSG00000038508	Gdf15	419.12	135.55	217.37	354.21	735.86	389.37	509.01	644.06	1.095	0.000198798
ENSMUSG00000035397	Klf16	65.44	76.49	55.86	31.71	94.58	140.4	126.32	113.34	1.095	0.0123666
ENSMUSG00000028010	Gar1	124.62	191.7	111.72	144.95	264	460.5	245.22	271.22	1.093	0.0162206
ENSMUSG00000030538	Cib1	91.9	105.53	91.08	63.41	175.65	248.97	159.76	166.49	1.09	0.00859195
ENSMUSG00000038539	Atf5	282.66	189.77	219.8	253.65	460.43	550.36	507.78	483.83	1.088	0.00669814
ENSMUSG00000020572	Nampt	102.34	35.82	81.36	60.7	139.27	123.55	125.09	171.18	1.073	0.0289255
ENSMUSG00000022382	Wnt7b	137.85	57.12	35.22	122.3	239.05	151.63	105.27	181.34	1.068	0.0038696
ENSMUSG00000028293	Slc35a1	91.9	22.27	68	71.57	115.37	117.93	105.27	148.51	1.067	0.040454
ENSMUSG00000054723	Vmac	36.9	64.87	24.29	22.65	41.57	112.32	81.74	67.22	1.061	0.0451876
ENSMUSG00000036160	Surf6	38.29	29.05	51	51.64	49.89	84.24	128.8	103.17	1.057	0.0377515
ENSMUSG00000006373	Pgrmc1	121.84	140.39	88.65	74.28	194.36	303.26	211.78	168.05	1.049	0.0103159
ENSMUSG00000029147	Ppm1g	416.33	266.26	350.95	461.11	521.75	752.53	940	889.49	1.045	0.0308579
ENSMUSG00000068923	Syt11	21.58	106.5	49.79	50.73	68.6	151.63	134.99	77.38	1.043	0.0254354
ENSMUSG00000006362	Cbfa2t3	83.54	64.87	46.15	53.45	163.18	162.86	141.19	64.87	1.043	0.0393758
ENSMUSG00000000282	Mnt	30.63	47.44	27.93	16.31	86.27	91.73	45.82	32.83	1.039	0.0409988
ENSMUSG00000020674	Pxdn	24.37	37.76	53.43	59.79	53.01	97.34	89.17	114.12	1.033	0.00907727
ENSMUSG00000018372	Cep95	18.8	25.17	47.36	17.21	33.26	50.54	87.93	46.12	1.028	0.014737
ENSMUSG00000035284	Vps13c	42.47	12.59	35.22	38.95	55.09	50.54	59.45	82.07	1.026	0.0234457
ENSMUSG00000027349	Fam98b	104.43	30.01	68	125.92	121.6	97.34	177.1	221.2	1.009	0.0378959
ENSMUSG00000020783	Ncbp3	132.28	152.98	221.01	178.46	385.6	406.22	323.24	258.72	1.005	0.0350992
ENSMUSG00000006445	Epha2	28.54	65.84	38.86	22.65	62.36	121.68	53.25	64.09	0.987	0.0244306
ENSMUSG00000028948	Nol9	98.86	121.99	76.5	122.3	129.92	292.03	183.29	249.34	0.982	0.033293
ENSMUSG00000019773	Fbxo5	56.39	6.78	38.86	63.41	92.5	35.57	65.64	80.51	0.978	0.00612778
ENSMUSG00000079215	Zfp664	155.95	122.96	132.36	104.18	231.78	316.36	190.73	284.51	0.974	0.0356721
ENSMUSG00000085241	Snhg3	100.25	237.21	145.72	106.9	202.67	321.98	390.12	211.04	0.961	0.0364568
ENSMUSG00000031370	Zrsr2	233.93	243.99	236.8	224.67	446.92	475.48	396.31	519.78	0.96	0.0040252
ENSMUSG00000024603	Dctn4	165.7	63.9	114.15	150.38	215.15	175.97	299.71	232.92	0.953	0.0342574
ENSMUSG00000028494	Plin2	606.4	363.08	353.38	812.6	695.33	988.4	984.59	1299.84	0.944	0.0369284
ENSMUSG00000081461	Rpl30-ps11	5.57	0	3.64	3.62	8.31	1.87	6.19	4.69	0.926	0.0122166
ENSMUSG00000020790	Ankfy1	308.42	274.97	361.88	194.77	507.2	694.5	756.71	283.73	0.913	0.0403539
ENSMUSG00000049717	Lig4	38.29	109.41	119.01	64.32	102.9	140.4	210.54	132.09	0.906	0.0144529
ENSMUSG00000022241	Tars	446.27	579.96	505.17	472.88	1198.37	1089.49	966.01	606.54	0.906	0.0355526
ENSMUSG00000009079	Ewsr1	130.19	248.83	223.44	248.22	260.88	445.53	525.11	361.89	0.901	0.0223282
ENSMUSG00000046441	Cmtr2	16.01	67.77	24.29	51.64	45.73	104.83	56.97	60.97	0.887	0.0214109
ENSMUSG00000036139	Hoxc9	197.72	203.32	171.22	149.47	249.44	436.17	348.01	320.47	0.887	0.0254366
ENSMUSG00000033902	Mapkbp1	32.72	28.08	64.36	27.18	50.93	50.54	121.37	60.19	0.882	0.0328807
ENSMUSG00000063316	Rpl27	34.81	5.81	41.29	33.52	54.05	24.34	54.49	52.37	0.88	0.00117355
ENSMUSG00000021072	Tmx1	219.31	218.81	219.8	203.83	372.09	531.64	333.15	377.53	0.88	0.0226338
ENSMUSG00000035666	Gtf3c4	88.42	168.47	116.58	78.81	185	278.92	183.29	166.49	0.878	0.00222168
ENSMUSG00000039244	E130309D02Rik	101.65	81.33	163.94	211.08	240.09	204.04	279.9	243.09	0.878	0.0234156
ENSMUSG00000032096	Arcn1	113.48	182.99	155.44	63.41	236.97	325.72	215.49	138.35	0.869	0.0144041
ENSMUSG00000032477	Cdc25a	96.77	76.49	126.29	106.9	176.69	142.27	235.31	186.81	0.863	0.00271061
ENSMUSG00000097769	Snhg4	89.81	106.5	95.93	105.09	160.06	146.01	255.13	178.21	0.862	0.0448455
ENSMUSG00000042155	Klhl23	21.58	13.55	10.93	23.55	34.3	28.08	23.53	37.52	0.86	9.57746e-05
ENSMUSG00000001707	Eef1e1	54.3	52.28	26.72	67.94	89.38	121.68	53.25	97.7	0.855	0.0268965
ENSMUSG00000021701	Plk2	121.84	154.91	179.72	105.09	201.63	368.78	289.8	176.65	0.851	0.0360271
ENSMUSG00000051579	Tceal8	208.17	350.49	214.94	211.98	381.44	673.91	506.54	272.01	0.851	0.0386744
ENSMUSG00000046432	Bex3	363.42	122.96	178.51	186.62	433.41	295.77	296	419.73	0.848	0.024423
ENSMUSG00000020255	D10Wsu102e	134.37	142.33	182.15	208.36	314.92	168.48	416.13	336.88	0.843	0.0488722
ENSMUSG00000029345	Tfip11	41.77	58.09	32.79	40.77	89.38	89.85	52.02	80.51	0.842	0.0106469
ENSMUSG00000031358	Msl3	64.05	57.12	37.64	77.91	97.7	97.34	121.37	100.05	0.842	0.0444448
ENSMUSG00000025732	Mcrip2	66.84	74.55	31.57	26.27	86.27	86.11	78.02	75.04	0.836	0.0440846
ENSMUSG00000042369	Rbm45	45.95	52.28	37.64	57.07	115.37	67.39	68.12	98.48	0.834	0.0420289
ENSMUSG00000074748	Atxn7l3b	376.65	506.37	558.6	519.99	606.98	1207.42	1010.6	759.74	0.832	0.0352954
ENSMUSG00000040359	Ufl1	83.54	92.95	71.65	42.58	108.09	179.71	132.52	93.01	0.829	0.0228258
ENSMUSG00000022292	Rrm2b	18.1	39.7	47.36	24.46	38.46	59.9	73.07	50.02	0.828	0.000663285
ENSMUSG00000049800	Sertad2	256.9	202.36	374.02	403.13	518.64	378.14	656.39	611.23	0.828	0.00247159
ENSMUSG00000012017	Scarf2	49.43	79.39	40.07	60.7	111.21	101.09	95.36	89.11	0.825	0.0239794
ENSMUSG00000032766	Gng11	98.17	61	85	88.78	142.39	97.34	198.16	163.36	0.825	0.0309931
ENSMUSG00000032316	Clk3	148.99	67.77	72.86	164.88	176.69	132.91	209.3	249.34	0.821	0.0405163
ENSMUSG00000026043	Col3a1	153.17	128.77	208.87	144.04	256.72	312.62	351.73	206.35	0.818	0.0179844
ENSMUSG00000038975	Rabggtb	165	132.64	228.3	118.67	352.34	275.18	323.24	183.68	0.817	0.0198232
ENSMUSG00000042198	Chchd7	91.2	44.54	125.08	49.82	144.47	99.21	200.63	84.42	0.807	0.00734897
ENSMUSG00000092203	1110038B12Rik	368.29	444.41	315.73	317.97	552.94	539.13	724.51	712.84	0.805	0.0402065
ENSMUSG00000033434	Gtpbp6	43.16	32.92	38.86	30.8	66.52	44.93	78.02	68	0.803	0.0219299
ENSMUSG00000025239	Limd1	100.25	315.64	324.23	154.91	266.07	370.65	559.79	268.88	0.8	0.0339095
ENSMUSG00000005124	Wisp1	583.42	220.75	326.66	734.69	896.96	576.57	728.22	765.21	0.797	0.0459048
ENSMUSG00000047649	Cd3eap	148.99	231.4	180.94	236.44	346.1	342.57	396.31	287.64	0.795	0.0330668
ENSMUSG00000033964	Zbtb41	67.53	37.76	94.72	42.58	103.94	86.11	144.9	71.91	0.786	0.00369609
ENSMUSG00000044465	Fam160a2	84.94	96.82	46.15	79.72	115.37	151.63	127.56	118.03	0.768	0.0199139
ENSMUSG00000030061	Uba3	100.95	156.85	74.08	69.75	181.89	192.81	174.63	113.34	0.766	0.0237581
ENSMUSG00000003226	Ranbp2	98.86	181.05	155.44	116.86	128.88	368.78	261.32	218.86	0.765	0.0456947
ENSMUSG00000033014	Trim33	38.99	66.81	82.58	52.54	78.99	119.81	123.85	80.51	0.76	0.0041844
ENSMUSG00000058351	Smim4	183.1	123.93	242.87	264.53	339.87	293.9	312.1	386.12	0.754	0.0104495
ENSMUSG00000078813	Leng1	44.56	89.08	60.72	43.48	58.2	116.06	122.61	100.83	0.745	0.0420316
ENSMUSG00000046794	Ppp1r3b	16.71	13.55	24.29	7.25	27.02	16.85	34.68	20.32	0.739	0.0213164
ENSMUSG00000078619	Smarcd2	143.42	175.25	115.36	216.51	243.21	366.91	222.93	248.56	0.739	0.0458977
ENSMUSG00000040297	Suco	112.09	185.9	95.93	160.35	190.2	263.95	216.73	229.8	0.734	0.00495054
ENSMUSG00000030447	Cyfip1	163.61	200.42	61.93	174.84	207.87	308.88	203.11	218.86	0.729	0.0398612
ENSMUSG00000044155	Lsm8	199.12	121.99	160.29	170.31	406.39	235.87	208.06	250.9	0.727	0.0468543
ENSMUSG00000038250	Usp38	82.85	31.95	162.72	54.35	144.47	59.9	174.63	118.81	0.726	0.0485639
ENSMUSG00000032381	Fam96a	116.96	68.74	89.86	120.49	181.89	129.17	121.37	229.02	0.724	0.0250166
ENSMUSG00000019861	Gopc	55	141.36	157.87	83.34	128.88	194.68	183.29	164.14	0.715	0.0182876
ENSMUSG00000020075	Ddx21	586.9	514.12	596.25	606.96	716.11	932.24	1205.04	994.23	0.715	0.0296401
ENSMUSG00000032244	Fem1b	84.94	88.11	80.15	134.07	117.45	155.37	157.29	202.44	0.708	0.00836687
ENSMUSG00000028309	Rnf20	230.44	278.84	179.72	294.42	381.44	357.55	427.27	421.3	0.707	0.0238176
ENSMUSG00000023106	Denr	610.57	490.88	672.75	720.2	844.99	913.52	1372.23	984.85	0.707	0.0317975
ENSMUSG00000055485	Soga1	161.52	135.55	177.3	180.28	216.19	269.56	253.89	330.63	0.698	0.0197862
ENSMUSG00000018547	Pip4k2b	111.39	172.34	202.8	113.24	203.71	293.9	232.83	218.86	0.695	0.0222657
ENSMUSG00000036817	Sun1	205.38	240.12	325.45	211.98	368.97	462.38	404.98	336.88	0.691	0.0164609
ENSMUSG00000074922	Fam122a	20.89	54.22	18.22	13.59	25.98	63.65	33.44	35.17	0.686	0.0371693
ENSMUSG00000038335	Tsr1	190.06	336.94	378.88	394.07	361.69	580.31	512.73	596.38	0.683	0.00395092
ENSMUSG00000038429	Usp5	352.98	234.31	275.66	333.37	562.29	434.3	499.11	419.73	0.683	0.0106798
ENSMUSG00000049232	Tigd2	66.84	82.3	36.43	59.79	84.19	117.93	97.84	84.42	0.68	0.0366899
ENSMUSG00000020184	Mdm2	1989.06	1087.3	1774.17	2455.01	2639.95	2766.77	2636.72	3260.16	0.677	0.0227629
ENSMUSG00000030779	Rbbp6	617.54	480.23	820.9	645.91	760.81	861.11	1439.11	1083.33	0.672	0.0274463
ENSMUSG00000034317	Trim59	105.13	135.55	114.15	182.99	163.18	256.46	214.26	216.51	0.671	0.0290211
ENSMUSG00000015217	Hmgb3	249.24	294.33	258.66	277.21	445.88	499.82	366.59	413.48	0.668	0.00636736
ENSMUSG00000025793	Hgs	201.2	154.91	234.37	215.61	257.76	320.11	333.15	370.49	0.668	0.0183992
ENSMUSG00000041438	Utp4	67.53	153.94	122.65	88.78	134.08	217.15	154.81	159.45	0.663	0.00704755
ENSMUSG00000034168	Irf2bpl	588.99	479.26	323.02	349.68	741.06	887.31	662.59	460.38	0.658	0.0390567
ENSMUSG00000032491	Nradd	176.14	231.4	200.37	287.17	253.6	467.99	336.87	365.8	0.655	0.0384286
ENSMUSG00000059248	Sept9	231.84	116.18	128.72	136.79	297.25	237.74	174.63	239.18	0.654	0.0164829
ENSMUSG00000020534	Shmt1	57.09	30.98	58.29	43.48	101.86	50.54	87.93	60.19	0.647	0.0222316
ENSMUSG00000028330	Ncbp1	270.82	152.01	197.94	338.81	397.03	293.9	314.57	457.25	0.644	0.000209495
ENSMUSG00000079225	Gm9531	247.15	163.63	148.15	197.49	366.89	254.59	307.14	250.12	0.644	0.0182825
ENSMUSG00000021281	Tnfaip2	239.5	158.79	106.86	226.48	281.66	301.39	200.63	327.5	0.642	0.0192588
ENSMUSG00000029622	Arpc1b	1099.31	883	1142.71	1838.99	1700.38	1735.32	2045.96	2020.5	0.641	0.030943
ENSMUSG00000024811	Tnks2	539.56	523.8	579.25	909.53	913.59	1068.89	896.66	1018.46	0.641	0.0333474
ENSMUSG00000085795	Zfp703	385.7	323.38	256.23	190.24	537.34	576.57	516.44	226.67	0.641	0.0444535
ENSMUSG00000048486	Fitm2	104.43	131.68	123.86	88.78	196.44	209.66	193.2	109.43	0.63	0.0247464
ENSMUSG00000007415	Gatad1	263.86	237.21	269.59	207.45	454.2	434.3	324.48	308.74	0.622	0.0296456
ENSMUSG00000051695	Pcbp1	639.81	731.96	806.33	819.85	1313.74	1248.6	1114.63	942.64	0.616	0.0434454
ENSMUSG00000026739	Bmi1	90.51	166.53	91.08	76.1	106.01	263.95	153.57	133.66	0.612	0.0403409
ENSMUSG00000033671	Cep350	98.17	271.1	241.66	59.79	123.68	383.75	329.43	132.88	0.599	0.0266319
ENSMUSG00000030753	Thap12	186.58	291.43	197.94	162.16	221.38	408.09	398.79	256.37	0.597	0.0476326
ENSMUSG00000037852	Cpe	233.93	150.07	323.02	123.2	318.04	308.88	473.1	158.67	0.595	0.0348154
ENSMUSG00000074754	Smim26	89.81	102.63	91.08	87.87	125.76	159.12	178.34	108.65	0.594	0.0399027
ENSMUSG00000054766	Set	1214.88	820.07	1312.71	1232.04	1798.08	1525.66	1644.7	1853.24	0.59	0.00604554
ENSMUSG00000042406	Atf4	1340.2	832.66	944.77	949.39	1629.7	1256.09	1614.97	1564.82	0.589	0.0107503
ENSMUSG00000022962	Gart	183.1	182.02	205.23	173.93	195.4	310.75	357.92	280.6	0.587	0.0472548
ENSMUSG00000092417	Gpank1	29.24	86.17	18.22	49.82	42.61	114.19	38.39	64.09	0.582	0.0111674
ENSMUSG00000021094	Dhrs7	32.72	53.25	37.64	35.33	47.81	74.88	64.4	50.81	0.58	0.00573587
ENSMUSG00000093686	Gm4705	179.62	203.32	187.01	209.26	283.74	308.88	300.95	268.88	0.574	0.00435793
ENSMUSG00000031939	Taf1d	463.67	464.74	434.74	418.53	608.02	902.29	611.81	579.97	0.574	0.0453175
ENSMUSG00000112395	AC159139.1	88.42	47.44	116.58	116.86	133.04	91.73	148.62	157.11	0.57	0.000829213
ENSMUSG00000030374	Strn4	59.87	144.26	69.22	72.47	97.7	162.86	106.51	125.06	0.569	0.0134319
ENSMUSG00000020362	Cnot6	138.55	234.31	185.8	185.71	214.11	325.72	325.72	239.18	0.566	0.0161606
ENSMUSG00000040269	Mrps28	50.13	88.11	64.36	16.31	66.52	104.83	89.17	36.74	0.559	0.00215489
ENSMUSG00000054520	Sh3bp2	87.03	37.76	52.22	84.25	120.56	71.13	73.07	110.99	0.558	0.00252794
ENSMUSG00000042492	Tbc1d10b	207.47	356.3	208.87	279.02	386.64	458.63	296	388.47	0.558	0.00994292
ENSMUSG00000020900	Myh10	80.06	121.03	63.15	84.25	139.27	142.27	95.36	128.97	0.558	0.0170904
ENSMUSG00000056429	Tgoln1	132.98	255.61	190.65	130.45	172.53	380.01	294.76	204	0.553	0.0191705
ENSMUSG00000078851	Hist3h2a	224.88	118.12	265.94	202.02	298.29	252.72	334.39	268.1	0.552	0.0136449
ENSMUSG00000032264	Zw10	77.28	82.3	87.43	157.63	146.55	129.17	120.13	175.08	0.541	0.032569
ENSMUSG00000026556	Vangl2	87.72	30.01	81.36	68.85	122.64	48.67	125.09	88.32	0.533	0.0175078
ENSMUSG00000047417	Rexo1	86.33	88.11	30.36	63.41	90.42	131.04	60.69	92.23	0.533	0.0468919
ENSMUSG00000028609	Magoh	571.59	386.31	608.39	705.7	881.37	675.78	876.84	793.35	0.527	0.0184948
ENSMUSG00000000171	Sdhd	171.96	65.84	112.93	60.7	219.3	91.73	147.38	114.12	0.526	0.0074597
ENSMUSG00000049327	Kmt5a	497.09	468.61	552.53	360.55	734.82	718.84	696.02	543.23	0.524	0.00379316
ENSMUSG00000062867	Impdh2	162.91	166.53	191.87	134.07	205.79	239.61	314.57	193.84	0.524	0.0225404
ENSMUSG00000034163	Zfc3h1	50.82	94.88	91.08	43.48	80.03	110.45	122.61	74.25	0.515	0.00572189
ENSMUSG00000064145	Arih2	252.72	423.11	499.1	293.51	443.8	539.13	713.36	383	0.513	0.0142881
ENSMUSG00000043702	Pde12	171.27	203.32	154.22	134.98	202.67	321.98	217.97	211.82	0.511	0.0275958
ENSMUSG00000025869	Nop16	176.14	251.73	182.15	187.52	232.81	292.03	279.9	329.85	0.511	0.0344484
ENSMUSG00000112825	AC152949.2	208.17	101.66	188.22	231.91	288.94	157.25	257.6	325.94	0.507	0.00275334
ENSMUSG00000033379	Atp6v0b	486.65	404.71	534.31	494.63	684.93	722.58	715.84	601.07	0.504	0.0193899
ENSMUSG00000051154	Commd3	454.62	255.61	395.88	367.8	614.26	370.65	509.01	590.91	0.502	0.00963407
ENSMUSG00000040813	Tex264	220	213.01	161.51	67.04	279.59	260.2	178.34	161.8	0.501	0.0428975
ENSMUSG00000030397	Mark4	126.71	125.87	149.37	192.05	160.06	194.68	253.89	233.71	0.499	0.030533
ENSMUSG00000029048	Rer1	180.32	240.12	199.15	186.62	286.86	370.65	241.5	248.56	0.495	0.0241911
ENSMUSG00000021840	Mapk1ip1l	373.17	317.57	433.52	499.16	515.52	481.1	709.65	579.97	0.494	0.0268681
ENSMUSG00000020680	Taf15	75.89	61	93.51	86.06	104.97	73.01	131.28	145.38	0.493	0.0391784
ENSMUSG00000079562	Maea	344.62	491.85	257.44	385.92	439.65	688.88	429.75	512.75	0.492	0.00746959
ENSMUSG00000033166	Dis3	118.36	107.47	38.86	103.27	125.76	136.65	91.65	132.09	0.489	0.0498206
ENSMUSG00000075700	Selenot	197.03	306.92	264.73	185.71	260.88	413.71	372.78	287.64	0.487	0.00285236
ENSMUSG00000038872	Zfhx3	364.81	208.16	319.37	443.9	515.52	348.19	450.81	520.56	0.486	0.00479826
ENSMUSG00000021477	Ctsl	850.07	1126.99	928.98	543.55	1268.01	1596.79	1237.24	748.02	0.486	0.00960252
ENSMUSG00000053332	Gas5	1038.05	1262.54	1830.03	1349.8	1767.94	1385.26	2315.95	2186.21	0.483	0.0414264
ENSMUSG00000020074	Ccar1	461.59	594.48	315.73	514.56	547.74	907.91	542.45	633.9	0.48	0.036958
ENSMUSG00000024912	Fosl1	107.22	61	68	116.86	133.04	102.96	81.74	176.65	0.478	0.0385151
ENSMUSG00000020472	Zkscan17	42.47	30.01	47.36	27.18	62.36	41.18	64.4	36.74	0.469	0.00959495
ENSMUSG00000035530	Eif1	1819.89	1536.54	1606.59	2027.42	2433.12	2648.84	1953.08	2666.13	0.467	0.0237823
ENSMUSG00000000787	Ddx3x	878.61	648.7	743.18	598.81	1059.1	868.59	1130.73	894.96	0.466	0.00955987
ENSMUSG00000052533	Nup188	132.28	93.92	93.51	84.25	182.93	142.27	111.46	123.5	0.465	0.0135254
ENSMUSG00000026031	Cflar	113.48	189.77	157.87	250.03	199.56	252.72	195.68	306.4	0.454	0.00884686
ENSMUSG00000037894	H2afz	2238.31	839.44	1084.42	2008.4	2928.89	1151.26	1762.35	2440.24	0.452	0.010986
ENSMUSG00000025364	Pa2g4	1776.72	1402.93	1531.3	1852.58	2072.47	2345.58	1967.94	2555.14	0.444	0.025545
ENSMUSG00000057113	Npm1	1743.3	1447.47	1289.64	1542.76	2210.7	1868.23	1945.65	2149.47	0.443	0.00237324
ENSMUSG00000041773	Enc1	369.69	464.74	480.88	336.09	608.02	643.96	518.92	468.19	0.442	0.0402536
ENSMUSG00000025940	Tmem70	313.29	300.14	239.23	330.66	449	456.76	277.42	444.75	0.44	0.0230796
ENSMUSG00000028917	Plekhm2	161.52	147.17	160.29	129.54	194.36	224.64	230.36	166.49	0.437	0.0173542
ENSMUSG00000026771	Spopl	77.28	67.77	71.65	77	109.13	89.85	79.26	125.06	0.437	0.0484253
ENSMUSG00000071041	Impdh2-ps	284.05	296.27	401.95	220.14	394.95	385.63	548.65	296.24	0.431	0.00633811
ENSMUSG00000022757	Tfg	109.3	298.21	142.08	136.79	181.89	318.23	200.63	181.34	0.429	0.0222249
ENSMUSG00000029422	Rsrc2	405.19	546.07	587.75	635.04	676.62	797.46	699.74	716.75	0.425	0.0336737
ENSMUSG00000018446	C1qbp	862.6	974.98	953.27	760.06	1213.96	1263.58	1284.3	989.54	0.417	0.00154857
ENSMUSG00000035206	Sppl2b	60.57	78.42	29.14	94.21	76.91	84.24	59.45	111.77	0.417	0.0397481
ENSMUSG00000034354	Mtmr3	57.79	58.09	112.93	46.2	90.42	84.24	126.32	57.84	0.413	0.0255792
ENSMUSG00000021832	Psmc6	553.48	628.37	613.25	532.67	664.15	876.08	961.06	643.28	0.412	0.0384794
ENSMUSG00000031843	Mphosph6	351.58	236.24	425.02	337	510.32	301.39	604.38	402.54	0.411	0.0303914
ENSMUSG00000029426	Scarb2	325.13	593.51	434.74	395.88	455.24	756.28	580.85	513.53	0.404	0.000754565
ENSMUSG00000015889	Lta4h	199.81	170.4	132.36	131.36	231.78	215.28	168.43	214.17	0.398	0.0244008
ENSMUSG00000031578	Mak16	200.51	163.63	208.87	194.77	266.07	224.64	263.8	251.68	0.39	0.000135281
ENSMUSG00000031513	Leprotl1	167.79	274.97	199.15	145.85	193.32	344.44	296	198.53	0.383	0.0264631
ENSMUSG00000090266	Mettl23	41.08	45.51	81.36	51.64	51.97	61.78	95.36	74.25	0.38	0.00763929
ENSMUSG00000026670	Uap1	84.24	83.27	17	54.35	97.7	102.96	22.29	83.63	0.378	0.0442713
ENSMUSG00000097415	AU020206	93.29	80.36	47.36	86.97	125.76	102.96	56.97	118.81	0.375	0.0202616
ENSMUSG00000078453	Abracl	242.28	176.21	190.65	180.28	321.16	273.31	222.93	206.35	0.362	0.0436827
ENSMUSG00000044147	Arf6	249.24	185.9	286.59	166.69	349.22	222.76	308.38	252.47	0.361	0.0476547
ENSMUSG00000005054	Cstb	877.92	788.12	690.97	751	922.94	1008.99	963.53	1093.5	0.36	0.0403963
ENSMUSG00000034120	Srsf2	675.32	841.37	616.89	556.23	925.02	1010.86	780.24	724.57	0.357	0.00283359
ENSMUSG00000024091	Vapa	1134.12	1460.06	1103.85	1219.35	1483.15	1943.1	1331.36	1550.75	0.352	0.00699503
ENSMUSG00000003131	Pafah1b2	464.37	550.91	644.82	519.99	555.01	754.4	699.74	775.37	0.349	0.0488063
ENSMUSG00000037706	Cd81	1004.63	1066	1047.99	1034.55	1239.95	1529.4	1463.88	1096.62	0.345	0.0489621
ENSMUSG00000030663	1110004F10Rik	411.46	252.7	258.66	320.69	461.47	398.73	308.38	396.28	0.341	0.0384808
ENSMUSG00000018583	G3bp1	1004.63	1135.71	1130.56	836.15	1422.87	1392.75	1257.05	1106	0.336	0.0206125
ENSMUSG00000100755	Rps23-ps1	602.92	434.72	544.03	570.72	717.15	679.53	606.85	687.83	0.326	0.0401375
ENSMUSG00000022781	Pak2	139.24	259.48	282.94	260	199.56	299.52	374.02	295.45	0.325	0.0207445
ENSMUSG00000014402	Tsg101	100.95	162.66	148.15	102.37	133.04	185.33	195.68	126.62	0.321	0.0114483
ENSMUSG00000025162	Csnk1d	414.94	515.09	568.32	473.79	485.38	688.88	667.54	630.77	0.32	0.0140893
ENSMUSG00000052911	Lamb2	174.75	259.48	148.15	129.54	215.15	312.62	153.57	189.94	0.292	0.0468873
ENSMUSG00000042541	Sem1	515.19	649.67	738.33	508.21	762.88	756.28	828.54	585.44	0.287	0.0457871
ENSMUSG00000047648	Fbxo30	41.77	69.71	76.5	47.11	50.93	91.73	87.93	56.28	0.281	0.0244126
ENSMUSG00000027523	Gnas	2133.18	2209.45	2754.15	1710.36	2610.85	3105.6	3265.86	1836.04	0.28	0.0496157
ENSMUSG00000078429	Ctdsp2	297.28	168.47	247.73	139.51	330.51	217.15	263.8	189.15	0.258	0.0185071
ENSMUSG00000024844	Banf1	529.81	588.67	399.52	465.64	600.75	715.09	437.18	601.85	0.238	0.0284236
ENSMUSG00000038803	Ost4	110	137.49	126.29	72.47	121.6	147.89	149.86	90.67	0.202	0.0138283
ENSMUSG00000040681	Hmgn1	1980.71	1035.01	1504.58	2292.85	2142.1	1329.1	1695.47	2574.68	0.2	0.00587415
ENSMUSG00000024359	Hspa9	1665.33	1517.18	1517.94	1394.19	1937.35	1787.73	1779.69	1496.03	0.194	0.0121838
ENSMUSG00000036093	Arl5a	468.55	306.92	421.38	474.7	482.26	359.42	509.01	549.48	0.185	0.0386802
ENSMUSG00000049832	Rbx1-ps	73.8	74.55	57.07	52.54	77.95	80.49	65.64	54.71	0.109	0.031367
ENSMUSG00000064326	Siva1	572.28	320.48	332.73	516.37	548.78	299.52	293.52	481.48	-0.112	0.00667456
ENSMUSG00000067344	Rps25-ps1	2611.47	1861.86	2052.25	2609.02	2457.03	1594.92	1844.09	2385.52	-0.151	0.00273094
ENSMUSG00000031029	Eif3f	632.85	498.63	393.45	568.91	568.53	482.97	310.86	521.34	-0.168	0.0344122
ENSMUSG00000051855	Mest	528.42	276.91	314.52	138.6	492.65	247.1	310.86	104.74	-0.171	0.0410003
ENSMUSG00000061848	Gm5805	10046.3	6098.73	7981.94	9241.17	9079.78	4560.12	7622.82	8303.22	-0.199	0.0290044
ENSMUSG00000002885	Adgre5	383.61	405.68	297.52	298.95	330.51	402.47	242.74	243.09	-0.207	0.0476056
ENSMUSG00000007892	Rplp1	15858.2	13484.2	13060.4	16319.9	13764.1	9927.06	11825	15133.9	-0.227	0.0356237
ENSMUSG00000064179	Tnnt1	4923.58	4868.14	4904.77	4449.82	4010.86	4191.34	4524.16	3686.93	-0.228	0.00885737
ENSMUSG00000030884	Uqcrc2	651.65	727.12	627.82	651.35	526.95	614.01	585.8	541.67	-0.232	0.0138262
ENSMUSG00000028809	Srrm1	976.08	914.96	938.69	1021.86	806.54	872.34	736.89	855.88	-0.24	0.0256629
ENSMUSG00000030695	Aldoa	3618.19	4184.59	3850.71	3065.59	3014.12	3275.95	3532.14	2620.79	-0.244	0.0209008
ENSMUSG00000028798	Eif3i	692.73	712.6	707.97	703.89	593.47	548.49	671.25	569.81	-0.248	0.0286252
ENSMUSG00000031059	Ndufb11	875.83	698.08	682.47	585.22	697.4	527.9	641.53	505.71	-0.26	0.0406713
ENSMUSG00000034088	Hdlbp	780.45	867.51	805.12	993.78	606.98	784.36	641.53	856.66	-0.265	0.0062778
ENSMUSG00000005161	Prdx2	1554.63	1228.65	1384.36	1782.83	1314.78	1169.98	1021.74	1435.85	-0.269	0.0367368
ENSMUSG00000006931	P3h4	343.23	274	372.81	366.89	250.48	215.28	309.62	357.98	-0.278	0.048774
ENSMUSG00000022982	Sod1	4182.81	3220.26	3554.41	5170.02	3551.46	2504.7	3244.81	3980.04	-0.28	0.0296655
ENSMUSG00000032518	Rpsa	1606.15	1125.06	1105.06	1731.19	1381.3	765.64	896.66	1645.32	-0.287	0.0294385
ENSMUSG00000008668	Rps18	2248.05	1669.19	2070.47	2254.81	2024.66	1345.95	1484.93	1921.24	-0.295	0.0177051
ENSMUSG00000018593	Sparc	4215.54	3293.84	3960	4925.42	3158.59	2656.33	3560.62	3856.54	-0.311	0.0171549
ENSMUSG00000017837	Nkiras2	244.37	275.94	206.44	203.83	215.15	220.89	167.19	150.85	-0.313	0.00539939
ENSMUSG00000026915	Strbp	189.37	64.87	108.08	161.25	159.02	54.29	90.41	115.68	-0.315	0.0428412
ENSMUSG00000022452	Smdt1	565.32	362.11	484.53	391.35	399.11	293.9	406.22	337.66	-0.321	0.0365075
ENSMUSG00000060600	Eno3	2446.47	2980.14	2916.87	2918.84	2395.71	2237	2284.99	2076	-0.325	0.049472
ENSMUSG00000028955	Vamp3	267.34	277.88	231.94	184.81	214.11	258.33	154.81	150.85	-0.327	0.0346042
ENSMUSG00000006356	Crip2	2300.27	2519.27	2535.57	2672.43	1684.79	2311.88	1914.69	2125.24	-0.33	0.0148374
ENSMUSG00000080944	Gm12967	33.42	43.57	46.15	45.3	23.91	29.95	39.63	42.21	-0.335	0.0352538
ENSMUSG00000058064	Gm10036	3083.5	2322.73	2177.33	2726.78	2346.86	1600.53	1840.38	2425.39	-0.338	0.0215342
ENSMUSG00000027230	Creb3l1	126.71	49.38	105.65	123.2	96.66	31.82	92.89	108.65	-0.341	0.0171965
ENSMUSG00000024908	Ppp6r3	435.83	633.21	405.59	463.83	409.5	486.71	267.51	379.09	-0.341	0.0378412
ENSMUSG00000050856	Atp5k	1650.01	1525.89	1220.42	1512.87	1223.32	1181.21	969.73	1295.94	-0.342	0.00729776
ENSMUSG00000040998	Npnt	1590.14	2004.19	2687.36	2769.36	1488.35	1327.23	1964.22	2357.39	-0.345	0.0442341
ENSMUSG00000040322	Slc25a24	398.93	606.1	485.74	461.11	332.59	424.94	378.97	383.78	-0.351	0.0250859
ENSMUSG00000058881	Zfp516	148.29	139.42	94.72	82.44	113.29	112.32	85.45	56.28	-0.353	0.0204407
ENSMUSG00000032601	Prkar2a	458.8	639.02	723.75	588.84	400.15	541	589.51	368.93	-0.355	0.0339675
ENSMUSG00000025241	Fyco1	101.65	225.59	183.37	164.88	85.23	181.58	157.29	106.3	-0.358	0.030577
ENSMUSG00000068243	Gm7079	80.06	116.18	54.65	99.65	73.79	95.47	29.72	87.54	-0.358	0.0317831
ENSMUSG00000113061	AL607105.1	2750.02	1887.03	2275.7	2567.34	2307.36	1499.45	1504.75	2165.89	-0.359	0.0117659
ENSMUSG00000027475	Kif3b	274.31	253.67	248.94	254.56	216.19	217.15	172.15	202.44	-0.36	0.00674028
ENSMUSG00000001158	Snrnp27	468.55	300.14	352.16	378.67	375.21	196.56	263.8	353.3	-0.361	0.0219809
ENSMUSG00000030662	Ipo5	467.85	416.33	338.8	445.71	342.99	316.36	240.26	413.48	-0.363	0.0207064
ENSMUSG00000041736	Tspo	492.91	399.87	467.53	421.25	376.25	307	334.39	365.8	-0.366	0.00970349
ENSMUSG00000063882	Uqcrh	2893.44	2083.58	1893.17	2441.42	2225.25	1304.76	1777.21	1933.74	-0.372	0.0375547
ENSMUSG00000024387	Csnk2b	326.52	259.48	235.58	264.53	272.31	155.37	210.54	207.13	-0.378	0.034727
ENSMUSG00000001020	S100a4	16445.8	6384.35	9830.18	17320.1	13292.3	5234.03	6784.38	13334.5	-0.379	0.017912
ENSMUSG00000062397	Zfp706	447.66	549.94	460.24	463.83	329.47	366.91	348.01	432.24	-0.384	0.0371106
ENSMUSG00000035248	Zcchc6	233.93	266.26	234.37	246.41	163.18	204.04	200.63	186.81	-0.385	0.00576305
ENSMUSG00000028944	Prkag2	58.48	30.01	68	76.1	45.73	22.46	44.59	68	-0.385	0.0388123
ENSMUSG00000015656	Hspa8	1850.52	1534.61	1845.82	1887.91	1293.99	1050.18	1530.76	1604.68	-0.394	0.0083778
ENSMUSG00000023044	Csad	43.86	35.82	60.72	54.35	28.06	22.46	52.02	52.37	-0.394	0.0465727
ENSMUSG00000027180	Fbxo3	135.76	147.17	167.58	127.73	102.9	101.09	118.89	115.68	-0.396	0.0251011
ENSMUSG00000036427	Gpi1	1074.25	937.22	954.48	882.35	708.84	688.88	684.88	851.19	-0.396	0.0478694
ENSMUSG00000061207	Stk19	213.74	156.85	234.37	246.41	138.23	125.42	169.67	219.64	-0.398	0.0261384
ENSMUSG00000052146	Rps10	3246.42	2343.06	2078.97	2835.49	2612.93	1342.2	1884.96	2235.45	-0.401	0.034736
ENSMUSG00000027012	Dync1i2	1342.98	1346.78	1271.43	1424.99	891.76	1067.02	995.74	1119.29	-0.41	0.00424121
ENSMUSG00000021549	Rasa1	637.03	604.16	552.53	895.04	533.19	398.73	382.69	731.6	-0.419	0.00468132
ENSMUSG00000029207	Apbb2	374.56	440.53	336.38	549.89	313.88	254.59	256.36	461.16	-0.422	0.0340308
ENSMUSG00000024758	Rtn3	533.99	404.71	433.52	486.47	370.01	293.9	383.93	340.79	-0.423	0.0185808
ENSMUSG00000030557	Mef2a	1176.59	1825.07	1658.8	1316.29	919.83	1301.02	1316.5	924.66	-0.424	0.00657132
ENSMUSG00000063856	Gpx1	3449.01	2253.02	2873.16	3128.1	2959.03	1389	2221.83	2342.53	-0.428	0.00340897
ENSMUSG00000027893	Ahcyl1	318.17	193.64	247.73	500.06	240.09	159.12	169.67	363.46	-0.428	0.0298123
ENSMUSG00000035215	Lsm7	429.56	341.78	343.66	387.73	286.86	282.67	232.83	317.34	-0.429	0.015469
ENSMUSG00000029545	Acads	391.96	432.79	427.45	406.75	262.96	409.96	278.66	297.02	-0.434	0.0343712
ENSMUSG00000023977	Ubr2	327.91	315.64	296.3	257.28	230.74	260.2	189.49	208.69	-0.435	0.013357
ENSMUSG00000028988	Ctnnbip1	543.74	375.66	565.89	517.27	418.86	192.81	465.67	467.41	-0.435	0.0255518
ENSMUSG00000041895	Wipi1	344.62	727.12	381.31	452.05	262.96	499.82	296	335.32	-0.435	0.03321
ENSMUSG00000056342	Usp34	396.14	508.31	409.24	462.92	299.33	417.45	322	283.73	-0.438	0.0140737
ENSMUSG00000023074	Mospd1	108.61	198.48	65.58	66.13	76.91	157.25	45.82	50.02	-0.439	0.017824
ENSMUSG00000029467	Atp2a2	795.07	1034.04	790.54	777.27	534.23	799.33	553.6	635.46	-0.44	0.00363553
ENSMUSG00000038400	Pmepa1	1015.77	887.85	1061.34	1473.91	561.25	666.42	812.44	1367.85	-0.442	0.0379975
ENSMUSG00000038690	Atp5j2	2156.85	1599.48	1388	1594.4	1340.76	1183.08	1029.17	1356.12	-0.449	0.0354016
ENSMUSG00000046186	Cd109	121.14	95.85	110.51	96.03	85.23	50.54	99.08	82.07	-0.449	0.0489097
ENSMUSG00000034685	Fam171a2	605.7	741.65	887.69	591.56	492.65	572.82	559.79	431.46	-0.45	0.0260032
ENSMUSG00000038132	Rbm24	1223.93	1572.37	1176.71	1050.85	1023.76	1140.03	873.13	667.51	-0.454	0.00738397
ENSMUSG00000081631	Gm12005	322.34	365.98	366.73	343.34	257.76	237.74	296	232.14	-0.456	0.00904627
ENSMUSG00000021540	Smad5	205.38	308.86	263.51	296.23	127.84	277.05	173.39	228.23	-0.457	0.0128711
ENSMUSG00000019471	Cdc37	612.66	599.32	490.6	693.02	372.09	516.66	366.59	503.37	-0.457	0.0197991
ENSMUSG00000057530	Ece1	139.94	182.02	166.37	162.16	107.05	144.14	122.61	102.39	-0.459	0.00497812
ENSMUSG00000005533	Igf1r	285.45	169.44	166.37	196.58	195.4	101.09	141.19	158.67	-0.459	0.0326453
ENSMUSG00000081344	Gm14303	7826.07	6907.19	5086.92	6504.42	5449.32	3962.96	4160.04	5590.19	-0.46	0.0402414
ENSMUSG00000042451	Mybph	831.97	1067.93	1169.42	674	761.84	917.27	816.16	338.44	-0.465	0.0469053
ENSMUSG00000001289	Pfdn5	595.95	545.1	491.81	545.36	321.16	413.71	392.6	458.03	-0.469	0.0415768
ENSMUSG00000034377	Tulp4	407.28	416.33	392.24	352.4	400.15	292.03	260.08	211.04	-0.469	0.049048
ENSMUSG00000004891	Nes	1384.76	1586.89	1607.8	1399.63	1080.93	971.55	1112.15	1132.58	-0.477	0.0143824
ENSMUSG00000020432	Tcn2	92.6	134.58	91.08	53.45	64.44	97.34	58.21	44.55	-0.477	0.0232872
ENSMUSG00000028995	Fam126a	121.14	144.26	53.43	114.14	95.62	102.96	27.25	101.61	-0.48	0.0206737
ENSMUSG00000031791	Tmem38a	717.09	755.2	718.9	466.54	581	449.27	452.04	404.88	-0.483	0.0427041
ENSMUSG00000029629	Phf14	131.58	122.96	171.22	170.31	110.17	89.85	125.09	100.05	-0.485	0.0266033
ENSMUSG00000036504	Phpt1	426.78	211.07	382.52	429.4	351.3	123.55	251.41	347.82	-0.486	0.00504085
ENSMUSG00000032334	Loxl1	61.96	92.95	102.01	51.64	36.38	86.11	76.79	32.83	-0.486	0.0222034
ENSMUSG00000061474	Mrps36	126.71	167.5	117.79	107.8	90.42	110.45	81.74	85.98	-0.487	0.0137309
ENSMUSG00000084106	Gm6136	3504.01	2255.92	2384.99	2484	2250.2	1375.9	1669.47	2340.97	-0.49	0.0479038
ENSMUSG00000025204	Ndufb8	2636.54	2144.58	2150.62	2435.08	1959.18	1344.07	1577.82	1837.6	-0.491	0.00100243
ENSMUSG00000014313	Cox6c	2841.22	2242.37	2182.19	2426.93	1905.13	1411.47	1694.24	1905.6	-0.492	0.00839316
ENSMUSG00000061130	Ppm1b	223.48	182.02	227.08	234.63	208.91	119.81	143.66	153.98	-0.492	0.0324245
ENSMUSG00000032952	Ap4b1	45.95	61	55.86	70.66	36.38	44.93	39.63	42.99	-0.5	0.0190871
ENSMUSG00000057375	Yipf1	112.79	145.23	153.01	241.88	101.86	93.6	99.08	161.02	-0.5	0.0417963
ENSMUSG00000041697	Cox6a1	1604.06	992.41	995.77	1214.82	1254.5	486.71	875.6	891.84	-0.501	0.0262492
ENSMUSG00000002844	Adprh	302.15	366.95	338.8	359.65	262.96	256.46	167.19	297.02	-0.501	0.0463837
ENSMUSG00000037933	Bicd2	224.88	436.66	439.6	346.06	156.94	346.31	260.08	261.84	-0.505	0.0246295
ENSMUSG00000039168	Dap	717.79	578.02	658.18	712.95	637.12	325.72	376.5	594.82	-0.514	0.0339826
ENSMUSG00000026253	Chrng	983.74	1005.97	1213.14	1057.2	671.42	688.88	793.86	831.65	-0.516	0.00401749
ENSMUSG00000020216	Jsrp1	479.69	655.48	588.96	440.27	341.95	385.63	430.99	344.7	-0.516	0.021203
ENSMUSG00000021577	Sdha	695.51	832.66	699.47	546.26	606.98	527.9	407.46	406.45	-0.516	0.0319705
ENSMUSG00000021493	Pdlim7	859.12	816.2	941.12	1011.9	631.93	589.67	718.32	598.73	-0.518	0.0101725
ENSMUSG00000028399	Ptprd	206.08	193.64	170.01	87.87	141.35	162.86	99.08	62.53	-0.518	0.0257184
ENSMUSG00000031972	Acta1	27044.9	36836.4	34833.7	28224.5	22293	25893.1	22069.7	18291.6	-0.521	0.0113309
ENSMUSG00000025651	Uqcrc1	483.17	579.96	397.09	491	319.08	449.27	269.99	333.75	-0.523	0.00057724
ENSMUSG00000039474	Wfs1	590.38	557.69	636.32	414.91	394.95	423.07	491.68	247.78	-0.526	0.00127931
ENSMUSG00000030218	Mgp	3225.53	2069.06	3026.17	2214.04	2211.74	1639.85	1918.4	1491.34	-0.53	0.0128845
ENSMUSG00000058835	Abi1	178.93	179.12	194.3	175.75	129.92	125.42	97.84	156.33	-0.532	0.0411267
ENSMUSG00000026074	Map4k4	1412.6	1369.04	1401.36	1457.61	1148.48	1025.84	835.97	919.97	-0.533	0.0101388
ENSMUSG00000020067	Mypn	208.86	238.18	162.72	168.5	137.19	207.79	126.32	86.76	-0.534	0.0227919
ENSMUSG00000029103	Lrpap1	178.93	221.72	239.23	159.44	126.8	159.12	162.24	104.74	-0.538	0.00160109
ENSMUSG00000001025	S100a6	19413.7	13508.4	15553.4	20222.6	13419.1	7150.92	10260.8	18888.8	-0.54	0.0263098
ENSMUSG00000022551	Cyc1	641.9	649.67	527.03	537.2	497.85	380.01	319.53	428.33	-0.547	0.0142552
ENSMUSG00000020522	Mfap3	132.98	96.82	89.86	114.14	126.8	63.65	42.11	82.85	-0.55	0.0415382
ENSMUSG00000025854	Fam20c	127.41	168.47	149.37	150.38	80.03	129.17	76.79	129.75	-0.556	0.0250317
ENSMUSG00000024942	Capn1	308.42	180.09	495.46	488.28	183.97	125.42	303.43	412.7	-0.556	0.0352412
ENSMUSG00000055065	Ddx17	813.17	863.64	778.4	883.26	522.79	636.47	526.35	591.69	-0.558	0.000449274
ENSMUSG00000053329	D10Jhu81e	227.66	340.81	234.37	154	133.04	205.92	179.58	121.93	-0.558	0.0397105
ENSMUSG00000025968	Ndufs1	328.61	411.49	394.66	384.11	261.92	196.56	277.42	299.36	-0.562	0.035266
ENSMUSG00000026414	Tnnt2	2834.26	3572.68	3915.07	3169.77	2367.64	2379.27	1976.61	2382.4	-0.563	0.0408737
ENSMUSG00000056271	Lman1l	92.6	54.22	97.15	100.56	64.44	33.7	65.64	71.13	-0.567	0.0014353
ENSMUSG00000032553	Srprb	105.82	138.45	82.58	100.56	66.52	91.73	74.31	55.5	-0.572	0.0304874
ENSMUSG00000056515	Rab31	670.45	757.14	705.54	689.4	470.83	552.23	313.33	616.7	-0.572	0.0456332
ENSMUSG00000059901	Adamts14	138.55	242.05	111.72	200.21	86.27	189.07	73.07	128.97	-0.573	0.00401372
ENSMUSG00000038664	Herc1	261.77	243.02	262.3	183.9	148.63	144.14	190.73	153.98	-0.573	0.023422
ENSMUSG00000015289	Lage3	391.96	213.01	292.66	378.67	239.05	140.4	164.72	340.79	-0.574	0.03313
ENSMUSG00000001864	Aif1l	877.92	981.76	1020.06	1165.9	774.32	683.27	457	858.23	-0.575	0.0431687
ENSMUSG00000024304	Cdh2	1282.41	945.94	1486.37	1636.98	1152.64	522.28	819.87	1209.96	-0.576	0.0331521
ENSMUSG00000055320	Tead1	331.39	324.35	290.23	274.49	284.78	224.64	120.13	221.2	-0.577	0.0475592
ENSMUSG00000110841	AC153368.1	1271.97	1340.97	1129.35	1203.95	756.65	771.25	959.82	832.43	-0.581	0.0199095
ENSMUSG00000041189	Chrnb1	355.07	326.29	290.23	375.95	248.41	213.4	170.91	275.91	-0.585	0.0001175
ENSMUSG00000035642	Aamdc	573.67	369.85	737.11	585.22	450.04	226.51	427.27	415.04	-0.585	0.02133
ENSMUSG00000036371	Serbp1	6939.8	5821.83	5621.24	7333.33	5998.1	2871.6	2973.58	6388.23	-0.588	0.0403381
ENSMUSG00000025701	Alox5	501.27	265.29	559.82	598.81	372.09	179.71	356.68	367.36	-0.59	0.0167093
ENSMUSG00000018189	Uchl5	116.96	144.26	54.65	120.49	57.16	108.57	33.44	103.17	-0.591	0.039918
ENSMUSG00000022956	Atp5o	2518.18	2209.45	2150.62	2079.97	1830.3	1334.71	1307.83	1510.1	-0.594	0.00184924
ENSMUSG00000045962	Wnk1	1590.14	1505.56	1547.08	1671.4	1022.72	1140.03	817.39	1254.51	-0.595	0.00793932
ENSMUSG00000106258	Rpl7a-ps7	667.66	279.81	360.66	560.76	416.78	198.43	174.63	499.46	-0.596	0.0477213
ENSMUSG00000003865	Gys1	781.84	478.29	869.48	694.83	490.57	342.57	448.33	576.06	-0.597	0.0427647
ENSMUSG00000020315	Sptbn1	1503.11	1973.21	1703.74	1803.66	988.42	1231.76	1068.81	1312.35	-0.606	0.0019601
ENSMUSG00000028223	Decr1	114.87	53.25	109.29	125.92	80.03	16.85	105.27	96.92	-0.607	0.0404462
ENSMUSG00000012535	Tnpo3	680.19	509.28	756.54	741.03	384.56	312.62	452.04	661.26	-0.609	0.02503
ENSMUSG00000033565	Rbfox2	877.92	1290.62	1203.42	1367.92	680.78	965.94	522.64	975.47	-0.618	0.0300018
ENSMUSG00000025862	Stag2	133.67	76.49	153.01	137.7	83.15	65.52	112.7	64.09	-0.62	0.0431936
ENSMUSG00000025228	Actr1a	226.96	220.75	312.09	269.96	180.85	151.63	153.57	179.77	-0.621	0.0330519
ENSMUSG00000050552	Lamtor4	258.99	145.23	168.79	227.38	191.24	99.21	73.07	181.34	-0.624	0.0123107
ENSMUSG00000036257	Pnpla8	73.8	87.14	97.15	56.17	38.46	67.39	66.88	35.95	-0.625	0.00632483
ENSMUSG00000028173	Wls	536.78	499.59	688.54	571.63	362.73	350.06	343.06	429.89	-0.625	0.0243984
ENSMUSG00000033938	Ndufb7	532.6	530.58	516.1	623.27	409.5	299.52	386.4	338.44	-0.627	0.0166462
ENSMUSG00000044330	Gm9790	651.65	626.43	575.6	697.55	472.91	310.75	343.06	560.43	-0.632	0.0112185
ENSMUSG00000006057	Atp5g1	1685.52	1534.61	1320	1332.59	1321.02	614.01	989.54	969.22	-0.633	0.0400628
ENSMUSG00000027293	Ehd4	2151.98	2525.08	2661.86	2490.34	1612.03	1641.72	1169.12	2007.22	-0.634	0.0351092
ENSMUSG00000019494	Cops6	365.51	524.77	411.67	414	225.54	252.72	296	330.63	-0.637	0.0345533
ENSMUSG00000063273	Naa15	394.75	610.94	359.45	527.24	286.86	396.86	167.19	404.1	-0.64	0.00862231
ENSMUSG00000025261	Huwe1	666.97	666.13	551.32	640.48	415.74	357.55	487.96	369.71	-0.64	0.0264761
ENSMUSG00000041120	Nbl1	349.5	303.05	410.45	347.87	209.95	131.04	341.82	264.19	-0.644	0.0171273
ENSMUSG00000018340	Anxa6	1739.82	1088.26	1112.35	1452.17	1008.17	662.68	575.89	1335.02	-0.645	0.0388354
ENSMUSG00000019124	Scrn1	301.46	169.44	120.22	360.55	280.62	89.85	58.21	243.09	-0.646	0.0397758
ENSMUSG00000021114	Atp6v1d	731.71	763.91	744.4	683.96	563.33	527.9	359.16	440.84	-0.65	0.0108942
ENSMUSG00000019933	Mrln	79.37	92.95	42.5	62.51	41.57	63.65	32.2	38.3	-0.651	0.0216486
ENSMUSG00000042148	Cox10	242.98	109.41	157.87	327.94	178.77	76.75	73.07	222.76	-0.653	0.0189224
ENSMUSG00000041278	Ttc1	263.17	331.13	357.02	280.83	128.88	207.79	255.13	208.69	-0.654	0.00425631
ENSMUSG00000023942	Slc29a1	627.98	615.78	670.32	583.41	429.25	342.57	348.01	480.7	-0.655	0.0183298
ENSMUSG00000022437	Samm50	826.4	547.04	771.11	977.48	703.64	271.44	402.5	699.56	-0.662	0.0143918
ENSMUSG00000051989	Smim11	160.82	169.44	121.44	164.88	128.88	82.37	76.79	105.52	-0.664	0.0181536
ENSMUSG00000032231	Anxa2	4228.07	3034.36	3033.45	4569.4	2631.64	1866.35	1518.37	3770.57	-0.667	0.00607938
ENSMUSG00000024205	Rpl36-ps2	1810.14	1105.69	1080.77	1524.64	960.36	542.87	766.62	1280.3	-0.672	0.037001
ENSMUSG00000097296	Gm26532	115.57	105.53	146.94	115.05	98.74	61.78	95.36	54.71	-0.673	0.0194354
ENSMUSG00000020475	Pgam2	764.44	904.3	865.83	580.69	577.88	496.07	665.06	279.04	-0.677	0.0129113
ENSMUSG00000021843	Ktn1	728.93	840.4	596.25	767.3	626.73	436.17	411.17	380.65	-0.68	0.0365691
ENSMUSG00000028677	Rnf220	281.27	327.25	211.3	299.86	233.85	160.99	122.61	188.37	-0.685	0.0250116
ENSMUSG00000030079	Ruvbl1	184.49	202.36	139.65	171.22	153.82	102.96	63.16	131.31	-0.685	0.0309915
ENSMUSG00000038845	Phb	1131.34	677.74	620.53	981.1	721.31	303.26	453.28	690.96	-0.689	0.0104278
ENSMUSG00000024213	Nudt3	607.09	539.29	658.18	586.12	404.31	303.26	291.04	521.34	-0.69	0.0393275
ENSMUSG00000017466	Timp2	2704.77	3733.4	3482.76	2953.26	1838.61	2137.79	1783.41	2177.61	-0.694	0.0142916
ENSMUSG00000087260	Lamtor5	151.08	66.81	69.22	118.67	122.64	28.08	34.68	95.36	-0.695	0.00269364
ENSMUSG00000031511	Arhgef7	262.47	277.88	240.44	375.95	132	183.45	108.99	357.98	-0.697	0.0390988
ENSMUSG00000002103	Acp2	117.66	193.64	121.44	139.51	77.95	104.83	66.88	101.61	-0.699	0.0183896
ENSMUSG00000066626	Gm5121	197.72	141.36	154.22	169.4	99.78	71.13	92.89	157.89	-0.7	0.0442708
ENSMUSG00000027111	Itga6	1296.34	1033.08	1226.5	1098.87	1131.85	340.7	774.05	840.25	-0.701	0.0437708
ENSMUSG00000000168	Dlat	148.29	235.27	126.29	168.5	91.46	138.53	78.02	107.86	-0.702	0.00869733
ENSMUSG00000068614	Actc1	10214.1	8955.91	10447.1	9253.86	6786.97	7725.62	4996.02	4766.36	-0.709	0.0275083
ENSMUSG00000029535	Triap1	266.65	213.97	318.16	367.8	212.03	99.21	198.16	220.42	-0.71	0.0113264
ENSMUSG00000030199	Etv6	148.99	58.09	104.43	135.89	103.94	39.31	34.68	114.9	-0.716	0.0481236
ENSMUSG00000020571	Pdia6	990.7	1135.71	984.84	1164.09	780.55	666.42	372.78	898.09	-0.719	0.024689
ENSMUSG00000032366	Tpm1	12089.6	10792.6	10413.1	11004.1	7462.55	5685.17	6453.7	7476.26	-0.72	0.00115845
ENSMUSG00000084131	Rpl3-ps2	172.66	101.66	176.08	179.37	132	65.52	63.16	134.44	-0.722	0.0482998
ENSMUSG00000024576	Csnk1a1	1203.05	1180.24	1072.27	1126.04	958.28	604.65	722.03	547.92	-0.727	0.0135455
ENSMUSG00000040225	Prrc2c	989.31	1003.06	954.48	1449.45	662.07	409.96	512.73	1302.97	-0.727	0.02795
ENSMUSG00000025786	Zdhhc3	183.8	150.07	133.58	195.68	125.76	52.42	111.46	125.84	-0.727	0.0288208
ENSMUSG00000058013	Sept11	627.98	763.91	548.89	645.01	437.57	400.6	279.9	458.81	-0.728	0.00902439
ENSMUSG00000019261	Map1s	110	82.3	70.43	122.3	66.52	35.57	35.92	118.03	-0.728	0.0446417
ENSMUSG00000027412	Lpin3	140.63	170.4	176.08	214.7	110.17	101.09	65.64	160.23	-0.731	0.0291045
ENSMUSG00000024308	Tapbp	68.92	97.79	74.08	60.7	57.16	84.24	33.44	24.23	-0.733	0.0425031
ENSMUSG00000005034	Prkacb	203.29	204.29	163.94	158.53	90.42	138.53	94.12	119.59	-0.735	0.0182448
ENSMUSG00000055775	Myh8	2179.83	4066.47	3639.41	1337.12	1392.73	2865.99	2121.51	664.38	-0.736	0.0125981
ENSMUSG00000097790	Gm16399	188.67	136.52	161.51	160.35	147.59	73.01	94.12	84.42	-0.739	0.00361613
ENSMUSG00000023051	Tarbp2	121.84	93.92	88.65	140.42	66.52	33.7	61.92	125.84	-0.741	0.0380653
ENSMUSG00000034243	Golgb1	209.56	218.81	240.44	209.26	123.68	147.89	161	100.05	-0.745	0.00183401
ENSMUSG00000013236	Ptprs	114.87	146.2	154.22	132.26	88.34	59.9	95.36	84.42	-0.746	0.0215972
ENSMUSG00000041133	Smc1a	639.12	324.35	348.52	529.96	379.36	125.42	203.11	477.57	-0.752	0.0335
ENSMUSG00000056305	Usp39	221.39	134.58	171.22	148.57	123.68	78.62	101.56	95.36	-0.754	0.0065301
ENSMUSG00000034165	Ccnd3	4661.11	3662.73	5299.43	5613.01	3804.03	1675.41	2500.48	3873.74	-0.761	0.0191186
ENSMUSG00000069020	Urm1	286.84	242.05	238.01	340.62	267.11	140.4	92.89	191.5	-0.765	0.0406955
ENSMUSG00000030770	Parva	137.15	138.45	127.51	219.23	85.23	82.37	58.21	153.98	-0.766	0.000628464
ENSMUSG00000050017	Pitpnb	98.17	64.87	71.65	144.95	41.57	26.21	63.16	110.99	-0.766	0.0404013
ENSMUSG00000025268	Maged2	203.99	163.63	146.94	147.66	179.81	102.96	81.74	56.28	-0.769	0.022237
ENSMUSG00000032802	Srxn1	1058.24	592.54	927.76	1396	743.14	220.89	561.03	995.79	-0.776	0.00025337
ENSMUSG00000004508	Gab2	136.46	221.72	246.51	189.33	65.48	147.89	102.79	164.14	-0.776	0.0490423
ENSMUSG00000037234	Hook3	307.03	266.26	219.8	272.68	149.67	138.53	139.95	196.19	-0.777	0.0110103
ENSMUSG00000038965	Ube2l3	733.11	586.73	530.67	596.99	357.54	323.85	267.51	511.18	-0.777	0.0258734
ENSMUSG00000022148	Fyb	999.75	583.83	531.89	862.42	631.93	230.25	334.39	619.83	-0.781	0.00609139
ENSMUSG00000021973	Micu2	219.31	162.66	177.3	198.39	157.98	108.57	58.21	139.13	-0.783	0.0171814
ENSMUSG00000009073	Nf2	448.36	258.51	422.59	465.64	282.7	104.83	205.59	412.7	-0.784	0.0232591
ENSMUSG00000031708	Tecr	925.96	924.64	1078.34	719.29	483.3	602.77	429.75	604.2	-0.785	0.0417917
ENSMUSG00000033713	Foxn3	254.81	303.05	272.01	232.82	145.51	166.61	112.7	200.1	-0.789	0.0284936
ENSMUSG00000036523	Greb1	148.29	248.83	144.51	211.98	94.58	132.91	63.16	157.11	-0.791	0.0135992
ENSMUSG00000028464	Tpm2	6320.87	7570.41	7510.77	5506.11	3974.48	3494.97	4233.11	3753.37	-0.793	0.0112748
ENSMUSG00000026014	Raph1	323.04	349.52	247.73	213.79	200.59	247.1	68.12	184.46	-0.797	0.0396287
ENSMUSG00000060992	Copz1	416.33	298.21	325.45	314.35	175.65	245.23	152.33	212.6	-0.799	0.0406431
ENSMUSG00000052374	Actn2	561.14	1109.56	830.62	347.87	320.12	546.62	461.95	245.43	-0.799	0.047242
ENSMUSG00000049521	Cdc42ep1	303.55	139.42	278.09	358.74	210.99	58.03	120.13	294.67	-0.804	0.0169507
ENSMUSG00000018574	Acadvl	279.18	262.38	279.3	245.5	170.45	192.81	94.12	168.83	-0.811	0.0252756
ENSMUSG00000000031	H19	37245.7	35866.2	32095.3	32100.9	20537.6	16866.5	18853.3	21788.6	-0.821	0.00446686
ENSMUSG00000025289	Prdx4	175.44	135.55	44.93	116.86	85.23	71.13	33.44	64.87	-0.822	0.0449301
ENSMUSG00000013593	Ndufs2	1174.5	1250.92	928.98	1077.13	773.28	434.3	507.78	867.61	-0.824	0.0360789
ENSMUSG00000022156	Gzme	108.61	38.73	58.29	91.5	61.32	20.59	24.77	71.13	-0.825	0.0213979
ENSMUSG00000037916	Ndufv1	461.59	348.55	298.73	462.01	229.7	149.76	251.41	261.06	-0.825	0.0264191
ENSMUSG00000025781	Atp5c1	1199.57	926.57	984.84	829.81	892.8	409.96	577.13	429.89	-0.83	0.00247341
ENSMUSG00000039831	Arhgap29	345.32	394.06	414.09	471.98	271.27	127.29	287.33	256.37	-0.835	0.0290825
ENSMUSG00000030042	Pole4	145.51	141.36	145.72	135.89	59.24	97.34	76.79	89.89	-0.839	0.00887527
ENSMUSG00000032503	Arpp21	270.13	448.28	392.24	259.09	187.08	220.89	219.21	132.88	-0.84	0.0161399
ENSMUSG00000002014	Ssr4	451.84	374.7	394.66	397.69	269.19	162.86	161	361.89	-0.84	0.0338377
ENSMUSG00000019795	Pcmt1	350.19	386.31	310.87	288.98	200.59	263.95	99.08	218.07	-0.844	0.0179333
ENSMUSG00000021458	2010111I01Rik	313.99	529.61	439.6	373.23	195.4	215.28	239.03	257.16	-0.849	0.0276903
ENSMUSG00000110057	Gm2225	120.44	93.92	131.15	134.98	60.28	28.08	91.65	113.34	-0.852	0.0190193
ENSMUSG00000024381	Bin1	2528.63	3012.09	2446.92	1678.65	1458.21	1102.59	1508.46	1202.92	-0.855	0.0348673
ENSMUSG00000031818	Cox4i1	1420.96	1286.75	1248.35	1364.3	940.61	389.37	734.42	1039.56	-0.86	0.0198201
ENSMUSG00000035770	Dync1li2	355.07	426.01	410.45	478.32	219.3	262.08	151.09	311.87	-0.861	0.00666788
ENSMUSG00000008140	Emc10	569.5	407.61	539.17	534.49	359.62	190.94	232.83	379.09	-0.863	0.00573713
ENSMUSG00000018845	Unc45b	433.74	316.6	454.17	397.69	270.23	252.72	234.07	143.04	-0.863	0.02447
ENSMUSG00000003464	Pex19	292.41	249.8	381.31	260	238.01	157.25	213.02	82.07	-0.863	0.025773
ENSMUSG00000020908	Myh3	9664.06	12815.2	12369.4	9068.14	6492.83	6638	6101.97	4799.97	-0.868	0.00717135
ENSMUSG00000025757	Hspa4l	214.43	294.33	272.01	192.96	140.31	138.53	142.42	107.86	-0.868	0.0101221
ENSMUSG00000024958	Gpr137	51.52	35.82	44.93	32.61	17.67	28.08	28.48	17.2	-0.869	0.0447481
ENSMUSG00000026393	Nek7	89.81	160.72	114.15	132.26	48.85	67.39	78.02	75.82	-0.87	0.0220401
ENSMUSG00000020032	Nuak1	401.02	524.77	474.81	408.56	271.27	147.89	334.39	261.06	-0.871	0.0444872
ENSMUSG00000018378	Cuedc1	79.37	76.49	46.15	57.07	57.16	48.67	13.62	35.17	-0.873	0.00194923
ENSMUSG00000035297	Cops4	523.55	428.92	387.38	375.95	267.11	215.28	193.2	261.06	-0.874	0.00716544
ENSMUSG00000025745	Hadha	333.48	607.07	496.67	461.11	247.37	325.72	194.44	256.37	-0.883	0.0208388
ENSMUSG00000027763	Mbnl1	363.42	386.31	381.31	397.69	228.66	196.56	141.19	282.17	-0.889	0.00910953
ENSMUSG00000022419	Deptor	955.89	931.41	921.69	949.39	572.68	441.78	392.6	657.35	-0.894	0.00421752
ENSMUSG00000112292	AC122832.1	13.92	11.62	6.07	11.78	6.24	3.74	4.95	7.82	-0.897	0.0499291
ENSMUSG00000020954	Strn3	1246.91	998.22	1242.28	1487.5	843.95	408.09	533.78	1021.59	-0.901	0.00408784
ENSMUSG00000065954	Tacc1	295.19	184.93	228.3	240.97	192.28	119.81	111.46	96.92	-0.901	0.00731168
ENSMUSG00000040287	Stac3	228.36	118.12	174.87	139.51	134.08	44.93	78.02	110.99	-0.903	0.0189739
ENSMUSG00000029394	Cdk2ap1	607.79	557.69	602.32	495.53	331.55	179.71	292.28	468.19	-0.903	0.0478362
ENSMUSG00000054252	Fgfr3	68.92	49.38	87.43	48.92	40.53	16.85	55.73	29.7	-0.904	0.00273785
ENSMUSG00000023939	Mrpl14	183.1	182.02	146.94	149.47	128.88	59.9	81.74	91.45	-0.906	0.0181373
ENSMUSG00000020564	Atxn7l1	23.67	8.71	18.22	32.61	13.51	1.87	14.86	19.54	-0.906	0.0282525
ENSMUSG00000025791	Pgm2	165.7	203.32	292.66	258.18	122.64	114.19	143.66	103.17	-0.907	0.026131
ENSMUSG00000027499	Pkia	880.01	661.29	664.25	948.49	549.82	355.67	247.7	601.07	-0.911	0.000682409
ENSMUSG00000040797	Iqsec3	285.45	217.85	284.16	424.87	228.66	82.37	110.22	277.48	-0.913	0.0145947
ENSMUSG00000027649	Ctnnbl1	74.49	30.98	63.15	86.97	37.42	28.08	18.58	51.59	-0.913	0.0477472
ENSMUSG00000039047	Pigk	146.9	118.12	82.58	139.51	87.31	93.6	28.48	66.44	-0.915	0.0141316
ENSMUSG00000024236	Svil	120.44	154.91	171.22	119.58	53.01	104.83	82.98	64.87	-0.92	0.00467749
ENSMUSG00000072964	Bhlhb9	151.08	93.92	132.36	172.12	88.34	22.46	107.75	103.96	-0.922	0.0136396
ENSMUSG00000106296	4632404M16Rik	28.54	121.99	83.79	85.16	13.51	86.11	24.77	63.31	-0.924	0.0427383
ENSMUSG00000010045	Tmem115	36.9	23.24	46.15	31.71	15.59	13.1	22.29	21.1	-0.925	0.0190462
ENSMUSG00000013495	Tmem175	53.61	63.9	44.93	70.66	35.34	20.59	35.92	31.27	-0.925	0.0447404
ENSMUSG00000090247	Bloc1s1	48.04	33.89	29.14	43.48	34.3	18.72	12.38	19.54	-0.926	0.0045797
ENSMUSG00000041733	Coq5	126.01	116.18	161.51	83.34	74.83	52.42	86.69	43.77	-0.93	0.00490347
ENSMUSG00000063236	1110038F14Rik	253.42	142.33	258.66	240.07	78.99	73.01	182.06	157.11	-0.936	0.0265317
ENSMUSG00000006800	Sulf2	178.23	129.74	133.58	192.05	106.01	39.31	65.64	151.64	-0.939	0.00721938
ENSMUSG00000039230	Tbcd	258.29	147.17	165.15	227.38	90.42	99.21	66.88	175.08	-0.94	0.0461298
ENSMUSG00000052512	Nav2	465.07	421.17	391.02	368.7	209.95	245.23	164.72	242.3	-0.946	0.00622208
ENSMUSG00000067071	Hes6	4622.82	4705.48	5884.75	5155.53	3015.16	2373.66	2602.04	2567.64	-0.949	0.00577146
ENSMUSG00000066036	Ubr4	785.32	1049.54	899.83	951.2	410.54	417.45	585.8	501.02	-0.953	0.00766207
ENSMUSG00000028530	Jak1	352.98	487.98	224.66	245.5	166.3	365.03	64.4	165.7	-0.953	0.00965328
ENSMUSG00000009207	Lnpk	108.61	130.71	63.15	53.45	42.61	73.01	23.53	46.12	-0.953	0.0463769
ENSMUSG00000040850	Psme4	698.3	492.82	816.04	741.94	470.83	235.87	318.29	415.83	-0.955	0.0124276
ENSMUSG00000028842	Ago3	74.49	25.17	104.43	98.74	56.12	7.49	66.88	42.21	-0.955	0.0387836
ENSMUSG00000028950	Tas1r1	52.22	59.06	34	74.28	36.38	28.08	7.43	62.53	-0.957	0.0178579
ENSMUSG00000026211	Obsl1	287.53	317.57	398.31	276.3	165.26	129.17	196.92	166.49	-0.959	0.0066628
ENSMUSG00000065979	Cpped1	245.07	211.07	179.72	253.65	161.1	56.16	108.99	156.33	-0.962	0.0119034
ENSMUSG00000031467	Agpat5	259.69	189.77	182.15	206.55	167.34	33.7	107.75	178.21	-0.967	0.0450934
ENSMUSG00000031934	Panx1	110	201.39	163.94	192.96	61.32	106.7	68.12	105.52	-0.974	0.00525644
ENSMUSG00000031312	Itgb1bp2	517.98	442.47	528.24	621.45	363.77	245.23	195.68	289.98	-0.974	0.011692
ENSMUSG00000001424	Snd1	275	178.15	185.8	262.71	89.38	134.78	92.89	143.82	-0.976	0.0338015
ENSMUSG00000013846	St3gal1	1139	843.31	1156.06	1346.18	839.8	424.94	388.88	707.37	-0.981	0.0151644
ENSMUSG00000036782	Klhl13	650.95	625.46	511.24	331.56	283.74	340.7	174.63	264.19	-0.989	0.0299472
ENSMUSG00000020400	Tnip1	166.39	241.08	195.51	185.71	72.75	185.33	130.04	52.37	-0.993	0.0153593
ENSMUSG00000002812	Flii	174.05	267.23	238.01	192.96	88.34	116.06	143.66	92.23	-0.995	0.0052314
ENSMUSG00000024856	Cdk2ap2	403.1	249.8	223.44	394.07	172.53	91.73	151.09	229.02	-1.001	0.0169976
ENSMUSG00000026950	Neb	2232.74	3668.53	2827.01	1891.54	1328.29	1235.5	1795.79	923.88	-1.002	0.0359206
ENSMUSG00000001334	Fndc5	1182.16	837.5	871.9	760.06	678.7	174.09	466.91	658.91	-1.003	0.0385313
ENSMUSG00000032481	Smarcc1	689.94	588.67	615.68	820.75	282.7	222.76	302.19	657.35	-1.007	0.00988111
ENSMUSG00000082475	Gm7206	12.53	10.65	4.86	6.34	7.28	5.62	1.24	3.91	-1.009	0.0084595
ENSMUSG00000022677	Fopnl	277.79	318.54	357.02	260	183.97	76.75	185.77	178.21	-1.011	0.028938
ENSMUSG00000020758	Itgb4	414.94	468.61	450.52	587.03	301.41	108.57	189.49	457.25	-1.022	0.0340384
ENSMUSG00000037151	Lrrc20	114.18	121.99	123.86	156.72	32.22	117.93	54.49	75.82	-1.025	0.0499723
ENSMUSG00000020111	Micu1	130.89	139.42	121.44	105.99	45.73	78.62	48.3	78.16	-1.026	0.0153924
ENSMUSG00000034021	Pds5b	179.62	111.34	168.79	80.63	90.42	52.42	55.73	58.62	-1.033	0.0368132
ENSMUSG00000111904	AC165349.1	5.57	4.84	29.14	22.65	3.12	0	19.82	17.98	-1.038	0.0344219
ENSMUSG00000112186	AC165349.2	5.57	4.84	29.14	22.65	3.12	0	19.82	17.98	-1.038	0.0344219
ENSMUSG00000022519	Srl	1207.92	2079.71	1537.37	1067.16	650.63	956.58	613.05	604.2	-1.042	0.0158176
ENSMUSG00000028517	Plpp3	195.63	261.42	151.79	162.16	61.32	174.09	123.85	52.37	-1.045	0.0289779
ENSMUSG00000035173	Ccdc186	115.57	103.6	105.65	124.11	59.24	37.44	65.64	57.84	-1.05	0.00267385
ENSMUSG00000027593	Raly	37.6	25.17	53.43	40.77	20.79	13.1	17.34	23.45	-1.05	0.0303773
ENSMUSG00000020476	Dbnl	255.51	229.46	196.73	277.21	170.45	56.16	84.22	198.53	-1.054	0.0137774
ENSMUSG00000024143	Rhoq	1090.26	1293.52	1572.59	1076.22	655.83	786.23	464.43	533.85	-1.055	0.0249306
ENSMUSG00000100975	Gm28875	132.98	50.35	122.65	104.18	55.09	41.18	50.78	41.43	-1.056	0.038813
ENSMUSG00000017485	Top2b	431.65	435.69	375.23	477.41	289.98	104.83	165.96	334.54	-1.059	0.0189017
ENSMUSG00000000538	Tom1l2	126.01	144.26	148.15	119.58	80.03	35.57	58.21	96.92	-1.059	0.0428911
ENSMUSG00000031990	Jam3	346.71	245.92	418.95	343.34	213.07	108.57	126.32	217.29	-1.062	0.0232059
ENSMUSG00000030257	Srgap3	185.89	202.36	156.65	172.12	62.36	116.06	47.06	151.64	-1.067	0.0337535
ENSMUSG00000035783	Acta2	2706.16	2218.16	3123.31	2861.76	1573.58	1091.36	1249.62	1302.19	-1.068	0.00429698
ENSMUSG00000039648	Kyat1	41.77	12.59	44.93	48.92	15.59	1.87	38.39	33.61	-1.069	0.0402515
ENSMUSG00000079442	St6galnac4	249.94	244.96	225.87	337.9	189.16	67.39	117.66	153.98	-1.07	0.0204547
ENSMUSG00000033319	Fem1c	116.96	84.23	132.36	134.98	45.73	39.31	64.4	76.6	-1.077	0.0019673
ENSMUSG00000024969	Mark2	75.19	90.04	108.08	86.06	45.73	59.9	28.48	39.86	-1.077	0.0289748
ENSMUSG00000024885	Aldh3b1	68.23	103.6	70.43	87.87	32.22	33.7	43.35	46.12	-1.078	0.017957
ENSMUSG00000053838	Nudcd3	394.75	539.29	323.02	332.47	207.87	151.63	146.14	244.65	-1.079	0.0452847
ENSMUSG00000026674	Ddr2	595.26	186.86	246.51	457.48	560.21	80.49	56.97	228.23	-1.081	0.048227
ENSMUSG00000020456	Ogdh	252.72	289.49	276.87	208.36	142.39	183.45	70.59	108.65	-1.089	0.0141405
ENSMUSG00000025171	Ubtd1	215.13	363.08	235.58	307.1	117.45	175.97	78.02	167.27	-1.093	0.00441261
ENSMUSG00000028433	Ubap2	217.91	293.37	285.37	170.31	56.12	119.81	161	135.22	-1.094	0.0290084
ENSMUSG00000074001	Klhl40	586.21	270.13	301.16	310.73	307.65	80.49	243.98	114.9	-1.094	0.0291545
ENSMUSG00000024570	Rbfa	83.54	50.35	46.15	77	43.65	9.36	27.25	53.93	-1.099	0.0124317
ENSMUSG00000026087	Mrpl30	242.28	160.72	233.16	258.18	113.29	52.42	182.06	100.83	-1.099	0.0157685
ENSMUSG00000040446	Rprd1a	128.1	73.58	68	115.96	73.79	33.7	12.38	98.48	-1.1	0.0180251
ENSMUSG00000111446	AC163623.1	209.56	119.09	188.22	159.44	179.81	5.62	118.89	110.99	-1.103	0.0360764
ENSMUSG00000057229	Atp5sl	64.75	69.71	30.36	50.73	37.42	35.57	3.72	46.9	-1.106	0.0400641
ENSMUSG00000025224	Gbf1	383.61	326.29	355.81	481.04	258.8	46.8	191.96	327.5	-1.111	0.0131077
ENSMUSG00000020814	Mxra7	186.58	69.71	142.08	142.23	150.71	5.62	96.6	78.16	-1.114	0.00501647
ENSMUSG00000018893	Mb	573.67	1389.38	1196.14	566.19	305.57	563.46	417.37	342.35	-1.117	0.0473982
ENSMUSG00000071064	Zfp827	171.27	115.22	106.86	156.72	115.37	52.42	23.53	95.36	-1.121	0.00163098
ENSMUSG00000000823	Zfp512b	42.47	36.79	40.07	38.95	18.71	9.36	16.1	35.95	-1.122	0.0393796
ENSMUSG00000031543	Ank1	1043.61	1320.63	1480.3	1530.08	797.18	361.29	518.92	895.74	-1.132	0.0258018
ENSMUSG00000028649	Macf1	1606.85	2321.76	2159.12	1781.92	1034.15	846.13	707.17	993.45	-1.137	0.0187156
ENSMUSG00000027861	Casq2	2248.05	3418.74	2814.87	1670.5	1378.18	1138.16	864.46	1140.39	-1.137	0.0439773
ENSMUSG00000045328	Cenpe	300.07	95.85	75.29	335.19	197.48	1.87	52.02	233.71	-1.142	0.0245969
ENSMUSG00000034161	Scx	846.59	953.68	1235	1058.1	573.72	477.35	273.7	578.4	-1.142	0.0331955
ENSMUSG00000047881	Rell1	609.88	378.57	327.88	399.51	219.3	190.94	159.76	191.5	-1.145	0.0187629
ENSMUSG00000084383	Gm13370	38.99	21.3	21.86	27.18	28.06	7.49	3.72	21.1	-1.151	0.0168806
ENSMUSG00000066839	Ecsit	88.42	74.55	103.22	121.39	32.22	41.18	22.29	106.3	-1.161	0.0473164
ENSMUSG00000038305	Spats2l	78.67	88.11	49.79	44.39	33.26	61.78	6.19	37.52	-1.163	0.042499
ENSMUSG00000040785	Ttc3	1448.11	1206.39	1318.79	1134.2	770.16	286.41	439.66	1064.58	-1.163	0.0477163
ENSMUSG00000030035	Wbp1	75.19	100.69	82.58	67.04	56.12	35.57	60.69	12.51	-1.17	0.0403884
ENSMUSG00000058056	Palld	1526.78	1430.04	1543.44	1553.63	998.82	741.3	455.76	601.85	-1.172	0.00757259
ENSMUSG00000032187	Smarca4	774.18	960.46	790.54	834.34	345.06	479.22	241.5	472.88	-1.173	0.00142798
ENSMUSG00000109673	Gm9712	6.27	8.71	7.29	10.87	4.16	1.87	3.72	4.69	-1.174	0.0243794
ENSMUSG00000038271	Iffo1	325.83	405.68	273.23	333.37	193.32	114.19	100.32	201.66	-1.178	0.0168936
ENSMUSG00000066629	Rpl36-ps3	437.91	320.48	297.52	397.69	271.27	46.8	143.66	291.55	-1.179	0.015799
ENSMUSG00000022708	Zbtb20	2057.99	2258.83	2212.55	2037.39	1246.18	761.89	613.05	1353	-1.182	0.0160891
ENSMUSG00000033306	Lpp	245.07	205.26	156.65	310.73	143.43	129.17	34.68	131.31	-1.193	0.0121432
ENSMUSG00000038663	Fsd2	59.87	86.17	44.93	56.17	27.02	43.06	18.58	21.89	-1.194	0.00219337
ENSMUSG00000023991	Foxp4	43.86	35.82	6.07	48.92	27.02	11.23	2.48	21.1	-1.194	0.0431479
ENSMUSG00000024613	Tcof1	186.58	191.7	210.08	212.89	149.67	22.46	110.22	121.93	-1.195	0.0354034
ENSMUSG00000008763	Man1a2	236.01	88.11	176.08	194.77	123.68	7.49	108.99	146.16	-1.2	0.0104791
ENSMUSG00000023170	Gps2	116.27	130.71	76.5	132.26	41.57	24.34	59.45	84.42	-1.2	0.0482294
ENSMUSG00000015668	Pdzd11	145.51	124.9	162.72	173.03	88.34	16.85	121.37	79.73	-1.205	0.0168112
ENSMUSG00000025158	Rfng	66.14	27.11	54.65	62.51	30.14	5.62	30.96	34.39	-1.208	0.00338515
ENSMUSG00000021496	Pcbd2	79.37	130.71	95.93	94.21	14.55	63.65	52.02	60.97	-1.217	0.00783997
ENSMUSG00000002107	Celf2	1407.04	1229.62	1305.43	1320.81	1122.5	202.17	457	844.94	-1.22	0.0302269
ENSMUSG00000030706	Mrpl48	162.91	174.28	110.51	155.82	58.2	37.44	71.83	97.7	-1.231	0.0319854
ENSMUSG00000021253	Tgfb3	206.08	404.71	353.38	194.77	153.82	149.76	121.37	68	-1.231	0.0387273
ENSMUSG00000061816	Myl1	3446.23	6206.2	5862.89	2729.5	1899.93	1772.76	2058.35	1623.44	-1.233	0.0452241
ENSMUSG00000026458	Ppfia4	488.74	342.75	500.31	401.32	262.96	24.34	222.93	379.09	-1.233	0.0489237
ENSMUSG00000038871	Bpgm	63.35	81.33	49.79	48.01	22.87	58.03	28.48	10.16	-1.235	0.00824399
ENSMUSG00000022544	Eef2kmt	71.71	56.16	66.79	63.41	44.69	16.85	58.21	11.72	-1.235	0.0411408
ENSMUSG00000003316	Glg1	498.48	395.03	569.53	587.03	420.94	54.29	230.36	320.47	-1.242	0.0257143
ENSMUSG00000030814	Bcl7c	112.79	112.31	112.93	99.65	30.14	26.21	74.31	71.13	-1.251	0.0284275
ENSMUSG00000029670	Ing3	52.91	16.46	51	57.07	15.59	1.87	37.15	42.99	-1.251	0.040994
ENSMUSG00000017376	Nlk	130.19	114.25	138.44	280.83	62.36	3.74	105.27	216.51	-1.262	0.022583
ENSMUSG00000019558	Slc6a8	181.71	173.31	212.51	266.34	102.9	71.13	30.96	210.26	-1.262	0.0312996
ENSMUSG00000068196	Col8a1	139.94	89.08	61.93	121.39	95.62	28.08	11.15	78.94	-1.268	0.00129022
ENSMUSG00000013160	Atp6v0d1	172.66	173.31	200.37	140.42	81.07	41.18	107.75	65.66	-1.271	0.00401846
ENSMUSG00000018339	Gpx3	465.07	635.14	548.89	655.88	249.44	181.58	220.45	307.96	-1.273	0.00623362
ENSMUSG00000003813	Rad23a	67.53	72.62	92.29	47.11	24.94	18.72	42.11	30.48	-1.275	0.0166414
ENSMUSG00000022855	Senp2	91.2	79.39	133.58	119.58	22.87	35.57	52.02	76.6	-1.28	0.00834368
ENSMUSG00000105599	Gm9238	43.86	40.66	59.5	60.7	24.94	9.36	27.25	26.58	-1.282	0.00350729
ENSMUSG00000029141	Slc4a1ap	53.61	22.27	117.79	61.6	25.98	0	70.59	50.81	-1.282	0.0381489
ENSMUSG00000037692	Ahdc1	102.34	156.85	168.79	187.52	36.38	119.81	35.92	88.32	-1.289	0.0272233
ENSMUSG00000079508	Apoo	161.52	128.77	138.44	125.02	111.21	50.54	16.1	89.11	-1.298	0.0327175
ENSMUSG00000075467	Dnlz	93.29	139.42	80.15	86.97	47.81	58.03	47.06	17.98	-1.306	0.0136732
ENSMUSG00000031004	Mki67	199.12	61.97	52.22	199.3	143.43	26.21	4.95	115.68	-1.308	0.0121323
ENSMUSG00000024976	Shoc2	206.08	158.79	183.37	198.39	83.15	46.8	65.64	120.37	-1.309	0.00178078
ENSMUSG00000039542	Ncam1	1980.71	2349.84	2355.84	2076.34	843.95	926.63	600.66	1271.71	-1.313	0.00802165
ENSMUSG00000031169	Porcn	82.15	152.01	76.5	129.54	55.09	87.98	27.25	23.45	-1.315	0.0343289
ENSMUSG00000031503	Col4a2	82.15	202.36	137.22	211.08	46.77	125.42	16.1	107.86	-1.318	0.020249
ENSMUSG00000025545	Clybl	103.04	41.63	81.36	73.38	76.91	1.87	38.39	44.55	-1.319	0.00354113
ENSMUSG00000028089	Chd1l	32.72	16.46	40.07	33.52	10.39	1.87	19.82	31.27	-1.322	0.0459136
ENSMUSG00000061650	Med9	79.37	65.84	77.72	74.28	45.73	3.74	49.54	46.12	-1.323	0.0184672
ENSMUSG00000069601	Ank3	385.7	151.04	231.94	311.63	260.88	3.74	90.41	242.3	-1.327	0.00653684
ENSMUSG00000024298	Zfp871	229.05	353.4	129.94	189.33	38.46	136.65	71.83	125.06	-1.331	0.0496542
ENSMUSG00000026639	Lamb3	38.99	30.01	36.43	83.34	12.47	1.87	30.96	59.4	-1.336	0.0280053
ENSMUSG00000024043	Arhgap28	207.47	135.55	257.44	145.85	114.33	44.93	90.41	53.93	-1.344	0.00976852
ENSMUSG00000039159	Ube2h	575.76	794.9	842.76	660.41	384.56	344.44	246.46	189.15	-1.344	0.0151833
ENSMUSG00000021846	Peli2	56.39	6.78	21.86	42.58	35.34	0	7.43	28.14	-1.348	0.0166362
ENSMUSG00000050373	Snx21	36.9	17.43	30.36	21.74	31.18	0	24.77	7.82	-1.35	0.0373184
ENSMUSG00000053774	Ubxn7	57.79	76.49	35.22	40.77	15.59	33.7	16.1	17.2	-1.359	0.0140394
ENSMUSG00000036862	Dchs1	82.85	49.38	74.08	65.23	21.83	33.7	30.96	20.32	-1.359	0.0220491
ENSMUSG00000001891	Ugp2	125.32	149.1	204.01	133.17	100.82	46.8	64.4	37.52	-1.369	0.0327644
ENSMUSG00000091570	Gm7707	13.23	6.78	17	15.4	4.16	0	13.62	10.16	-1.37	0.0147571
ENSMUSG00000037787	Apopt1	47.34	37.76	30.36	29.89	30.14	20.59	4.95	10.16	-1.376	0.00197982
ENSMUSG00000021773	Comtd1	117.66	56.16	78.93	86.06	83.15	0	39.63	66.44	-1.38	0.0156668
ENSMUSG00000025579	Gaa	235.32	225.59	195.51	269.05	164.22	9.36	107.75	141.47	-1.384	0.0304223
ENSMUSG00000001786	Fbxo7	48.73	53.25	78.93	57.98	28.06	7.49	48.3	20.32	-1.392	0.0079921
ENSMUSG00000027332	Ivd	82.85	71.65	61.93	64.32	58.2	11.23	19.82	32.83	-1.397	0.0146627
ENSMUSG00000061731	Ext1	258.99	281.75	230.73	298.04	162.14	13.1	122.61	164.14	-1.397	0.0314276
ENSMUSG00000044252	Osbpl1a	17.41	33.89	29.14	29.89	13.51	5.62	7.43	16.41	-1.401	0.0494714
ENSMUSG00000055538	Zcchc24	291.71	316.6	292.66	211.08	148.63	129.17	52.02	109.43	-1.406	0.0110357
ENSMUSG00000033060	Lmo7	529.81	721.31	596.25	535.39	374.17	153.5	219.21	191.5	-1.409	0.0234574
ENSMUSG00000085779	Atcayos	196.33	182.02	87.43	202.92	147.59	37.44	26.01	82.85	-1.409	0.0266906
ENSMUSG00000055027	Smyd1	501.27	378.57	462.67	431.21	241.13	61.78	216.73	210.26	-1.411	0.00101566
ENSMUSG00000025959	Klf7	271.52	64.87	143.29	192.96	129.92	3.74	55.73	161.02	-1.411	0.0407297
ENSMUSG00000045071	E130308A19Rik	18.1	16.46	20.64	23.55	10.39	0	14.86	12.51	-1.422	0.022001
ENSMUSG00000048440	Cyp4f16	45.95	22.27	23.07	38.05	25.98	18.72	1.24	14.85	-1.425	0.033252
ENSMUSG00000023800	Tiam2	18.8	59.06	35.22	55.26	2.08	26.21	11.15	49.24	-1.427	0.039397
ENSMUSG00000025521	Tmem192	34.81	22.27	68	68.85	16.63	0	56.97	32.83	-1.431	0.0252327
ENSMUSG00000001829	Clpb	68.92	62.93	52.22	72.47	29.1	9.36	18.58	52.37	-1.432	0.0131493
ENSMUSG00000020393	Kremen1	141.33	223.66	307.23	192.05	50.93	43.06	118.89	126.62	-1.433	0.0245964
ENSMUSG00000030982	9030624J02Rik	205.38	75.52	136.01	170.31	84.19	20.59	27.25	127.41	-1.444	0.0242436
ENSMUSG00000039218	Srrm2	1674.38	1417.45	1462.08	1225.69	576.84	331.34	423.56	1034.09	-1.446	0.0306914
ENSMUSG00000037816	Fbxw17	97.47	108.44	142.08	117.77	24.94	26.21	45.82	103.96	-1.447	0.0354584
ENSMUSG00000028431	Ikbkap	137.15	112.31	87.43	137.7	36.38	26.21	35.92	93.8	-1.448	0.0139712
ENSMUSG00000021175	Cdca7l	32.03	7.75	10.93	30.8	23.91	1.87	1.24	15.63	-1.454	0.0161911
ENSMUSG00000034040	Wbscr17	130.89	159.75	134.79	139.51	66.52	37.44	22.29	114.12	-1.458	0.0365423
ENSMUSG00000029128	Rab28	54.3	21.3	26.72	64.32	21.83	0	16.1	49.24	-1.462	0.0247288
ENSMUSG00000079363	Gbp4	89.11	174.28	95.93	186.62	59.24	132.91	0	98.48	-1.464	0.0307086
ENSMUSG00000050697	Prkaa1	155.25	175.25	156.65	168.5	91.46	43.06	23.53	119.59	-1.465	0.0238731
ENSMUSG00000024426	Atat1	66.84	61	111.72	66.13	15.59	50.54	50.78	12.51	-1.469	0.0305536
ENSMUSG00000026437	Cdk18	135.76	143.29	114.15	181.18	64.44	39.31	34.68	75.04	-1.472	0.0019353
ENSMUSG00000060227	Casc4	132.28	92.95	136.01	152.19	25.98	43.06	40.87	91.45	-1.472	0.0102748
ENSMUSG00000030850	Ate1	252.72	204.29	357.02	322.5	76.91	91.73	113.94	122.72	-1.483	0.00675246
ENSMUSG00000028706	Nsun4	160.13	157.82	145.72	115.05	50.93	41.18	29.72	109.43	-1.488	0.0492812
ENSMUSG00000082245	Gm6292	128.1	88.11	170.01	159.44	63.4	24.34	35.92	83.63	-1.49	0.0149125
ENSMUSG00000024049	Myom1	632.85	611.91	681.25	503.69	238.01	235.87	268.75	139.91	-1.496	4.6404e-05
ENSMUSG00000028383	Hsdl2	43.86	22.27	69.22	13.59	25.98	14.98	35.92	0	-1.496	0.0474178
ENSMUSG00000024191	Bnip1	59.87	37.76	46.15	57.07	37.42	1.87	26.01	23.45	-1.503	0.00572395
ENSMUSG00000098404	Mrip-ps	98.86	104.57	69.22	64.32	44.69	87.98	1.24	37.52	-1.505	0.0400897
ENSMUSG00000029577	Ube3b	181.71	204.29	279.3	200.21	86.27	106.7	81.74	42.21	-1.506	0.0116693
ENSMUSG00000027204	Fbn1	64.75	88.11	68	151.29	31.18	7.49	27.25	98.48	-1.506	0.0152487
ENSMUSG00000027472	Pdrg1	380.13	418.27	523.39	428.49	147.59	61.78	198.16	271.22	-1.51	0.00965865
ENSMUSG00000033450	Tagap	66.14	61	94.72	65.23	48.85	14.98	49.54	9.38	-1.51	0.0157867
ENSMUSG00000044600	Smim7	345.32	264.32	282.94	266.34	108.09	74.88	60.69	206.35	-1.517	0.0218415
ENSMUSG00000039086	Ss18l1	21.58	31.95	53.43	39.86	16.63	0	23.53	24.23	-1.52	0.047789
ENSMUSG00000018697	Aatf	82.85	62.93	93.51	58.88	42.61	13.1	14.86	45.33	-1.524	0.0427246
ENSMUSG00000047719	Ubiad1	29.94	51.31	14.57	28.08	19.75	46.8	1.24	4.69	-1.528	0.0475556
ENSMUSG00000024830	Rps6kb2	254.81	182.02	217.37	176.65	163.18	14.98	165.96	46.12	-1.531	0.0214709
ENSMUSG00000039126	Prune2	677.41	945.94	671.54	561.66	356.5	84.24	302.19	240.74	-1.534	0.0379175
ENSMUSG00000020889	Nr1d1	50.82	33.89	24.29	67.04	31.18	0	18.58	28.14	-1.534	0.0464919
ENSMUSG00000040118	Cacna2d1	469.24	379.54	540.39	323.41	194.36	149.76	102.79	144.6	-1.535	0.0153484
ENSMUSG00000093545	Gm5871	18.8	13.55	48.57	25.37	6.24	0	26.01	19.54	-1.548	0.0286692
ENSMUSG00000038859	Baiap2l1	181.71	187.83	180.94	164.88	64.44	63.65	76.79	42.99	-1.558	0.000123368
ENSMUSG00000006221	Hspb7	308.42	316.6	537.96	289.89	132	125.42	110.22	110.21	-1.559	0.0285783
ENSMUSG00000001995	Sipa1l2	135.76	70.68	99.58	88.78	81.07	1.87	38.39	58.62	-1.561	0.00765334
ENSMUSG00000063931	Pepd	126.71	81.33	125.08	140.42	65.48	0	61.92	99.27	-1.572	0.00488832
ENSMUSG00000028194	Ddah1	174.75	81.33	108.08	136.79	66.52	5.62	48.3	86.76	-1.579	0.010395
ENSMUSG00000014426	Map3k4	121.84	156.85	109.29	78.81	23.91	78.62	60.69	17.2	-1.584	0.00675471
ENSMUSG00000062866	Phactr2	87.03	40.66	44.93	77	48.85	0	24.77	39.86	-1.59	0.00537748
ENSMUSG00000052139	Babam2	107.22	45.51	148.15	92.4	37.42	7.49	39.63	60.97	-1.593	0.0391624
ENSMUSG00000040990	Sh3kbp1	90.51	111.34	165.15	115.96	21.83	56.16	29.72	57.84	-1.617	0.0247095
ENSMUSG00000022641	Bbx	222.09	126.84	60.72	144.04	109.13	1.87	32.2	89.89	-1.617	0.0405428
ENSMUSG00000062075	Lmnb2	199.12	200.42	170.01	214.7	159.02	3.74	58.21	120.37	-1.617	0.0421232
ENSMUSG00000032307	Ube2q2	21.58	9.68	15.79	33.52	10.39	0	8.67	13.29	-1.621	0.0242086
ENSMUSG00000068674	Gm10247	11.14	5.81	8.5	4.53	9.35	1.87	1.24	0.78	-1.626	0.0345321
ENSMUSG00000092558	Med20	164.3	171.37	121.44	179.37	42.61	65.52	17.34	121.15	-1.643	0.00567545
ENSMUSG00000068264	Ap5s1	86.33	29.05	44.93	69.75	59.24	18.72	1.24	22.67	-1.648	0.0322106
ENSMUSG00000029763	Exoc4	655.13	445.38	471.17	554.42	333.63	58.03	173.39	205.57	-1.652	0.000398714
ENSMUSG00000013878	Rnf170	66.14	32.92	119.01	124.11	40.53	0	49.54	53.15	-1.658	0.025053
ENSMUSG00000025145	Lrrc45	45.95	6.78	18.22	44.39	20.79	0	6.19	20.32	-1.661	0.032912
ENSMUSG00000056486	Chn1	220.7	335.97	205.23	185.71	159.02	73.01	60.69	39.86	-1.662	0.0339136
ENSMUSG00000035545	Leng8	35.51	10.65	20.64	17.21	16.63	0	16.1	4.69	-1.663	0.0290318
ENSMUSG00000022517	Mgrn1	411.46	326.29	391.02	239.16	78.99	59.9	127.56	207.91	-1.663	0.0429399
ENSMUSG00000024963	Dnajc4	63.35	30.98	36.43	30.8	25.98	0	16.1	24.23	-1.664	0.0385094
ENSMUSG00000059256	Gzmd	29.24	17.43	14.57	26.27	23.91	0	8.67	7.03	-1.665	0.0477343
ENSMUSG00000051159	Cited1	9.05	31.95	54.65	24.46	3.12	18.72	35.92	0.78	-1.668	0.027255
ENSMUSG00000041308	Sntb2	59.18	98.76	58.29	54.35	15.59	33.7	45.82	7.03	-1.671	0.0309117
ENSMUSG00000004383	Large1	129.49	165.56	108.08	168.5	38.46	20.59	53.25	78.94	-1.672	0.0144992
ENSMUSG00000033763	Mtss1l	371.77	406.65	456.6	254.56	155.9	50.54	139.95	134.44	-1.682	0.0176275
ENSMUSG00000035133	Arhgap5	170.57	153.94	255.01	140.42	103.94	3.74	99.08	70.35	-1.689	0.0202482
ENSMUSG00000069769	Msi2	953.8	906.24	835.47	636.85	530.07	59.9	252.65	289.2	-1.692	0.0154669
ENSMUSG00000026594	Ralgps2	216.52	165.56	151.79	136.79	96.66	123.55	0	72.69	-1.7	0.0330817
ENSMUSG00000059439	Bcas3	63.35	69.71	41.29	96.93	14.55	7.49	33.44	36.74	-1.705	0.0384322
ENSMUSG00000075229	Ccdc58	96.77	68.74	76.5	57.98	68.6	1.87	24.77	28.14	-1.72	0.0176348
ENSMUSG00000027007	Ssfa2	27.15	13.55	40.07	19.02	2.08	9.36	17.34	5.47	-1.722	0.041274
ENSMUSG00000031957	Ctrb1	44.56	60.03	51	116.86	1.04	29.95	34.68	42.99	-1.722	0.0447395
ENSMUSG00000096403	Gm9825	75.19	39.7	41.29	23.55	61.32	14.98	19.82	0	-1.728	0.00333743
ENSMUSG00000039463	Slc9a8	81.46	107.47	102.01	160.35	40.53	20.59	16.1	78.94	-1.728	0.00678928
ENSMUSG00000040950	Mgl2	86.33	35.82	72.86	66.13	21.83	3.74	60.69	18.76	-1.73	0.0393405
ENSMUSG00000039607	Rbms3	199.12	114.25	178.51	156.72	72.75	0	70.59	136	-1.745	0.0315859
ENSMUSG00000024234	Mtpap	103.04	148.14	104.43	104.18	45.73	16.85	24.77	58.62	-1.75	0.0256869
ENSMUSG00000036820	Amdhd2	164.3	67.77	148.15	119.58	68.6	0	49.54	99.27	-1.75	0.0301141
ENSMUSG00000073889	Il11ra1	128.1	83.27	131.15	70.66	81.07	43.06	16.1	12.51	-1.75	0.0316103
ENSMUSG00000019278	Dpep1	192.85	272.07	299.94	221.95	128.88	22.46	73.07	101.61	-1.758	0.0329343
ENSMUSG00000053477	Tcf4	882.09	1183.15	794.19	905.91	302.45	159.12	291.04	383	-1.761	0.0128848
ENSMUSG00000034544	Rsrc1	158.74	152.98	112.93	125.92	67.56	11.23	26.01	99.27	-1.761	0.0348065
ENSMUSG00000032479	Map4	985.83	1421.33	1564.09	1121.51	663.11	462.38	137.47	331.41	-1.766	0.0312181
ENSMUSG00000000594	Gm2a	48.73	23.24	21.86	44.39	12.47	9.36	6.19	10.94	-1.778	0.0238443
ENSMUSG00000026663	Atf6	213.74	249.8	306.02	293.51	142.39	9.36	73.07	164.92	-1.78	0.0264763
ENSMUSG00000045594	Glb1	87.03	50.35	68	93.31	35.34	0	21.05	83.63	-1.783	0.0289676
ENSMUSG00000039476	Prrx2	456.71	612.87	438.38	350.59	149.67	93.6	173.39	118.03	-1.792	0.014392
ENSMUSG00000027175	Tcp11l1	63.35	29.05	32.79	48.92	17.67	0	26.01	22.67	-1.794	0.0431063
ENSMUSG00000040174	Alkbh3	128.8	104.57	64.36	91.5	46.77	1.87	53.25	35.17	-1.794	0.0495631
ENSMUSG00000066443	Gm10163	53.61	39.7	47.36	45.3	36.38	1.87	13.62	16.41	-1.82	0.00707149
ENSMUSG00000032548	Slco2a1	4.87	0.97	6.07	11.78	1.04	0	1.24	5.47	-1.83	0.038451
ENSMUSG00000032400	Zwilch	41.08	14.52	12.14	24.46	23.91	0	8.67	4.69	-1.832	0.0313437
ENSMUSG00000031171	Ftsj1	62.66	22.27	30.36	46.2	23.91	1.87	17.34	10.16	-1.836	0.0220945
ENSMUSG00000027546	Atp9a	109.3	60.03	166.37	136.79	45.73	9.36	22.29	78.94	-1.843	0.0362653
ENSMUSG00000033044	Dhrs7c	122.53	109.41	126.29	89.68	11.43	54.29	47.06	27.36	-1.845	0.00854357
ENSMUSG00000010607	Pigyl	155.95	95.85	121.44	79.72	114.33	3.74	27.25	36.74	-1.848	0.019189
ENSMUSG00000090112	Shprh	30.63	92.95	59.5	39.86	8.31	33.7	4.95	22.67	-1.858	0.0382696
ENSMUSG00000031072	Oraov1	48.73	93.92	69.22	64.32	16.63	48.67	0	46.12	-1.861	0.0320993
ENSMUSG00000046032	Snx12	304.94	176.21	197.94	223.76	148.63	73.01	50.78	22.67	-1.863	0.00477987
ENSMUSG00000039686	Zer1	97.47	75.52	70.43	58.88	48.85	14.98	9.91	21.1	-1.871	0.00248738
ENSMUSG00000020692	Nle1	29.24	47.44	29.14	33.52	22.87	16.85	1.24	8.6	-1.874	0.0263467
ENSMUSG00000022680	Pdxdc1	107.22	124.9	115.36	77.91	53.01	7.49	24.77	46.12	-1.878	0.0305595
ENSMUSG00000025477	Inpp5a	110.7	110.38	85	194.77	99.78	0	18.58	112.55	-1.884	0.0484366
ENSMUSG00000017400	Stac2	48.04	14.52	24.29	62.51	25.98	3.74	0	39.08	-1.887	0.00777408
ENSMUSG00000042208	0610010F05Rik	59.87	123.93	69.22	85.16	27.02	58.03	1.24	35.17	-1.894	0.00697673
ENSMUSG00000022779	Top3b	103.73	79.39	54.65	91.5	19.75	1.87	42.11	50.02	-1.912	0.0480119
ENSMUSG00000032122	Slc37a2	99.56	43.57	64.36	104.18	68.6	5.62	3.72	58.62	-1.913	0.00628803
ENSMUSG00000054612	Mgmt	187.28	26.14	126.29	187.52	91.46	0	27.25	77.38	-1.914	0.0227479
ENSMUSG00000002007	Srpk3	188.67	251.73	179.72	152.19	62.36	74.88	22.29	53.93	-1.934	0.00396606
ENSMUSG00000056214	Pard6g	117.66	129.74	43.72	127.73	19.75	18.72	16.1	63.31	-1.936	0.0274292
ENSMUSG00000095526	Gm10243	37.6	4.84	13.36	19.02	32.22	0	0	14.07	-1.949	0.0415207
ENSMUSG00000025006	Sorbs1	301.46	330.16	289.02	173.03	66.52	13.1	123.85	121.15	-1.95	0.0417224
ENSMUSG00000031879	Fam96b	171.27	137.49	111.72	127.73	46.77	1.87	89.17	47.68	-1.977	0.0386353
ENSMUSG00000029163	Emilin1	12.53	11.62	1.21	6.34	6.24	7.49	0	0	-1.979	0.033929
ENSMUSG00000021838	Samd4	337.66	499.59	409.24	318.88	104.97	119.81	33.44	187.59	-1.987	0.0187625
ENSMUSG00000038065	Mturn	21.58	17.43	17	37.14	10.39	3.74	1.24	12.51	-1.999	0.0113611
ENSMUSG00000031841	Cdh13	271.52	263.35	229.51	235.54	114.33	39.31	42.11	72.69	-2.009	0.00123775
ENSMUSG00000001211	Agpat3	357.85	257.54	398.31	286.27	175.65	1.87	69.35	228.23	-2.009	0.0375574
ENSMUSG00000038685	Rtel1	18.1	15.49	20.64	28.99	3.12	0	9.91	17.2	-2.032	0.00148633
ENSMUSG00000053333	Dis3l2	21.58	45.51	46.15	37.14	15.59	0	16.1	10.94	-2.044	0.0453356
ENSMUSG00000024667	Tmem216	22.28	33.89	23.07	30.8	4.16	7.49	17.34	3.13	-2.051	0.0307658
ENSMUSG00000038696	Mapkap1	142.03	210.1	173.65	163.97	119.53	63.65	3.72	45.33	-2.063	0.0385442
ENSMUSG00000070565	Rasal2	82.85	75.52	74.08	66.13	30.14	1.87	17.34	39.86	-2.071	0.0128449
ENSMUSG00000030707	Coro1a	4.18	4.84	6.07	0.91	1.04	0	3.72	0	-2.081	0.041522
ENSMUSG00000028096	Gpr89	114.87	45.51	87.43	118.67	37.42	0	66.88	24.23	-2.087	0.0364655
ENSMUSG00000020121	Srgap1	106.52	91.01	165.15	77	37.42	13.1	30.96	22.67	-2.092	0.0171676
ENSMUSG00000025512	Chid1	145.51	72.62	74.08	138.6	65.48	0	21.05	57.84	-2.099	0.00157313
ENSMUSG00000035757	Selenoo	16.71	19.36	18.22	28.08	0	1.87	16.1	17.2	-2.104	0.0448491
ENSMUSG00000029486	Mrpl1	153.86	55.19	77.72	87.87	115.37	0	6.19	73.47	-2.109	0.0347518
ENSMUSG00000027641	Rbl1	39.68	17.43	26.72	33.52	37.42	0	3.72	10.16	-2.136	0.0443217
ENSMUSG00000033658	Ddx19b	56.39	62.93	71.65	77	48.85	0	29.72	13.29	-2.138	0.0442631
ENSMUSG00000021764	Ndufs4	474.12	376.63	303.59	364.18	210.99	43.06	19.82	236.83	-2.139	0.01063
ENSMUSG00000038379	Ttk	48.04	51.31	36.43	62.51	24.94	3.74	2.48	37.52	-2.14	0.0101763
ENSMUSG00000062646	Ganc	17.41	25.17	44.93	30.8	13.51	1.87	8.67	5.47	-2.146	0.0457989
ENSMUSG00000038039	Gcc2	108.61	34.86	139.65	136.79	14.55	0	80.5	57.84	-2.156	0.0137395
ENSMUSG00000018449	Rpain	45.95	20.33	31.57	27.18	29.1	0	11.15	4.69	-2.159	0.000433847
ENSMUSG00000081752	Sms-ps	178.23	130.71	200.37	200.21	45.73	24.34	26.01	71.13	-2.183	0.00242122
ENSMUSG00000051335	Gfod1	167.09	110.38	106.86	86.97	30.14	54.29	2.48	43.77	-2.197	0.0294883
ENSMUSG00000019478	Rab4a	69.62	37.76	52.22	51.64	36.38	0	9.91	21.1	-2.198	0.000806288
ENSMUSG00000036282	Naa30	179.62	181.05	172.44	183.9	54.05	29.95	6.19	157.11	-2.2	0.0332327
ENSMUSG00000036672	Cenpt	75.89	72.62	48.57	68.85	50.93	0	7.43	35.17	-2.202	0.0253923
ENSMUSG00000026494	Kif26b	41.77	72.62	106.86	86.97	3.12	1.87	55.73	71.91	-2.204	0.0328091
ENSMUSG00000067653	Ankrd23	17.41	43.57	41.29	34.42	8.31	0	21.05	7.03	-2.212	0.0402963
ENSMUSG00000028437	Ubap1	103.04	152.98	156.65	136.79	62.36	1.87	61.92	27.36	-2.215	0.0225818
ENSMUSG00000025175	Fn3k	75.89	71.65	40.07	48.01	55.09	0	9.91	14.07	-2.224	0.039496
ENSMUSG00000020903	Stx8	41.77	46.47	34	33.52	13.51	0	14.86	10.94	-2.225	0.0173519
ENSMUSG00000008734	Gprc5b	208.86	223.66	213.73	137.7	59.24	35.57	22.29	54.71	-2.237	0.00896507
ENSMUSG00000070371	Prss36	8.35	10.65	24.29	6.34	1.04	0	18.58	1.56	-2.239	0.0117416
ENSMUSG00000021373	Cap2	238.8	374.7	335.16	184.81	74.83	37.44	69.35	51.59	-2.248	0.0172379
ENSMUSG00000035890	Rnf126	121.14	48.41	81.36	79.72	73.79	0	7.43	50.02	-2.25	0.0119717
ENSMUSG00000028737	Aldh4a1	87.72	75.52	65.58	67.04	16.63	3.74	18.58	32.05	-2.253	0.00860466
ENSMUSG00000035236	Scai	52.22	42.6	59.5	62.51	3.12	1.87	30.96	42.21	-2.258	0.0122545
ENSMUSG00000062202	Btbd9	151.08	29.05	150.58	181.18	90.42	0	12.38	77.38	-2.264	0.0406109
ENSMUSG00000021763	BC067074	18.1	24.21	42.5	24.46	11.43	0	32.2	1.56	-2.285	0.036157
ENSMUSG00000054150	Syne3	86.33	53.25	40.07	58.88	10.39	1.87	30.96	17.98	-2.288	0.0492778
ENSMUSG00000040591	1110051M20Rik	112.09	28.08	148.15	162.16	25.98	1.87	14.86	100.05	-2.29	0.0416793
ENSMUSG00000026571	Dcaf6	263.86	141.36	239.23	125.92	44.69	26.21	70.59	22.67	-2.3	0.0107771
ENSMUSG00000033767	Tmem131l	52.91	52.28	30.36	62.51	47.81	3.74	0	32.83	-2.304	0.0498084
ENSMUSG00000085227	6330418K02Rik	23.67	22.27	25.5	24.46	20.79	0	7.43	3.13	-2.322	0.0373321
ENSMUSG00000031970	Dbndd1	95.38	20.33	74.08	44.39	29.1	0	18.58	11.72	-2.33	0.0250873
ENSMUSG00000021993	Mipep	49.43	30.01	18.22	35.33	6.24	9.36	1.24	14.07	-2.332	0.0234577
ENSMUSG00000109059	Gm9354	20.19	10.65	48.57	23.55	3.12	3.74	42.11	0	-2.337	0.0474219
ENSMUSG00000039740	Alg2	32.72	36.79	42.5	32.61	3.12	0	28.48	16.41	-2.35	0.0212582
ENSMUSG00000026035	Ppil3	50.13	43.57	41.29	39.86	27.02	0	18.58	5.47	-2.354	0.00851469
ENSMUSG00000020935	Dcakd	230.44	185.9	202.8	177.56	50.93	3.74	35.92	157.89	-2.357	0.039765
ENSMUSG00000022678	Nde1	78.67	130.71	59.5	86.06	18.71	5.62	28.48	17.2	-2.375	0.0362865
ENSMUSG00000034906	Ncaph	39.68	10.65	20.64	45.3	23.91	1.87	0	11.72	-2.381	0.0327703
ENSMUSG00000025229	Pitx3	52.91	8.71	26.72	26.27	13.51	0	8.67	4.69	-2.381	0.0420035
ENSMUSG00000061536	Sec22c	41.77	30.01	49.79	10.87	8.31	7.49	23.53	0	-2.386	0.0159636
ENSMUSG00000042303	Sgsm3	34.11	59.06	20.64	15.4	27.02	28.08	1.24	0	-2.395	0.035054
ENSMUSG00000039179	Tekt5	24.37	1.94	12.14	21.74	12.47	0	0	7.03	-2.396	0.0364714
ENSMUSG00000025790	Slco3a1	169.87	332.09	214.94	285.36	117.45	71.13	1.24	66.44	-2.406	0.0269239
ENSMUSG00000005580	Adcy9	16.01	45.51	17	31.71	1.04	28.08	0	14.07	-2.439	0.000106523
ENSMUSG00000075704	Txnrd2	19.49	27.11	12.14	29.89	7.28	1.87	0	19.54	-2.44	0.0224467
ENSMUSG00000027797	Dclk1	1371.53	2297.55	2210.12	1787.36	1083	196.56	343.06	318.9	-2.442	0.0379697
ENSMUSG00000031750	Il34	94.68	74.55	48.57	96.93	24.94	0	9.91	50.81	-2.445	0.00731886
ENSMUSG00000026333	Gin1	25.76	19.36	24.29	19.93	15.59	0	9.91	1.56	-2.449	0.00505681
ENSMUSG00000010392	Gosr1	13.92	22.27	35.22	23.55	6.24	0	7.43	5.47	-2.454	0.021012
ENSMUSG00000038296	Galnt18	28.54	27.11	23.07	9.06	5.2	0	4.95	6.25	-2.459	0.0443254
ENSMUSG00000060716	Plekhh1	34.11	21.3	40.07	26.27	15.59	0	3.72	11.72	-2.46	0.017582
ENSMUSG00000039231	Suv39h1	119.05	50.35	63.15	64.32	75.87	0	3.72	35.17	-2.467	0.00569561
ENSMUSG00000029851	Tcaf2	67.53	39.7	61.93	51.64	32.22	1.87	1.24	38.3	-2.482	0.0319839
ENSMUSG00000061143	Maml3	168.48	65.84	95.93	98.74	45.73	16.85	0	44.55	-2.483	0.0195714
ENSMUSG00000004631	Sgce	34.11	21.3	17	32.61	27.02	0	1.24	9.38	-2.489	0.0186719
ENSMUSG00000037845	Fdxacb1	15.32	91.98	36.43	34.42	0	59.9	1.24	18.76	-2.489	0.0187039
ENSMUSG00000041765	Ubac2	111.39	172.34	59.5	106.9	24.94	3.74	18.58	33.61	-2.497	0.0425259
ENSMUSG00000044938	Klhl31	254.12	306.92	205.23	303.48	106.01	13.1	52.02	46.12	-2.514	0.0102716
ENSMUSG00000028926	Cdk14	69.62	21.3	53.43	99.65	17.67	1.87	1.24	67.22	-2.52	0.0164911
ENSMUSG00000106424	Gm34866	18.1	9.68	1.21	19.02	5.2	0	0	5.47	-2.545	0.0460786
ENSMUSG00000010721	Lmbr1	5.57	12.59	18.22	35.33	4.16	0	0	21.89	-2.553	0.0490121
ENSMUSG00000051527	Usp29	91.9	66.81	72.86	96.03	19.75	0	26.01	24.23	-2.565	0.00170929
ENSMUSG00000038267	Slc22a23	64.05	51.31	72.86	54.35	40.53	1.87	1.24	33.61	-2.565	0.0410035
ENSMUSG00000106717	Gm42798	14.62	7.75	13.36	4.53	1.04	1.87	7.43	0	-2.579	0.0359231
ENSMUSG00000039828	Wdr70	65.44	36.79	18.22	64.32	18.71	7.49	0	14.85	-2.597	0.0166941
ENSMUSG00000010461	Eya4	169.87	260.45	236.8	177.56	116.41	1.87	48.3	29.7	-2.609	0.0323349
ENSMUSG00000104682	Gm42636	20.89	10.65	4.86	4.53	16.63	0	1.24	0	-2.613	0.0390188
ENSMUSG00000022309	Angpt1	29.24	23.24	12.14	46.2	9.35	1.87	0	17.98	-2.617	0.00850913
ENSMUSG00000010936	Vac14	41.08	52.28	42.5	61.6	30.14	0	2.48	25.01	-2.632	0.0275564
ENSMUSG00000051329	Nup160	11.14	20.33	21.86	19.02	4.16	1.87	0	8.6	-2.657	0.0249499
ENSMUSG00000004568	Arhgef18	53.61	37.76	46.15	52.54	25.98	1.87	0	34.39	-2.66	0.0126976
ENSMUSG00000028973	Abcb8	48.73	36.79	52.22	25.37	9.35	1.87	3.72	14.85	-2.678	0.0260995
ENSMUSG00000028229	Rmdn1	29.24	59.06	37.64	36.24	16.63	1.87	3.72	7.03	-2.699	0.0364565
ENSMUSG00000101225	1700008J07Rik	6.27	6.78	8.5	5.44	3.12	0	0	1.56	-2.704	0.0209793
ENSMUSG00000046417	Lrrc75a	33.42	19.36	31.57	20.84	20.79	0	1.24	7.03	-2.721	0.0181241
ENSMUSG00000044197	Gpr146	55.7	62.93	68	22.65	14.55	1.87	6.19	9.38	-2.732	0.0301819
ENSMUSG00000067575	Rpl35a-ps3	27.85	9.68	8.5	17.21	18.71	0	0	3.91	-2.749	0.00251912
ENSMUSG00000032109	Nlrx1	22.28	21.3	15.79	32.61	11.43	0	0	19.54	-2.756	0.00660065
ENSMUSG00000027737	Slc7a11	40.38	35.82	18.22	48.92	13.51	1.87	0	21.89	-2.763	0.00375095
ENSMUSG00000019303	Psmc3ip	34.11	18.4	20.64	20.84	24.94	0	12.38	0	-2.765	0.0212723
ENSMUSG00000052889	Prkcb	36.9	61	99.58	39.86	2.08	1.87	23.53	22.67	-2.766	0.0367641
ENSMUSG00000006215	Zbtb17	34.81	30.98	27.93	36.24	0	14.98	1.24	22.67	-2.772	0.0190322
ENSMUSG00000050503	Fbxl22	84.24	59.06	38.86	60.7	63.4	0	1.24	23.45	-2.785	0.0159276
ENSMUSG00000022556	Hsf1	55	69.71	59.5	75.19	20.79	0	3.72	40.64	-2.792	0.0112372
ENSMUSG00000103284	3110080O07Rik	72.41	43.57	30.36	55.26	9.35	0	19.82	8.6	-2.792	0.0337602
ENSMUSG00000102252	Snrpn	37.6	69.71	76.5	56.17	16.63	1.87	2.48	27.36	-2.8	0.037735
ENSMUSG00000074968	Ano3	81.46	38.73	52.22	44.39	24.94	0	2.48	25.01	-2.841	0.014855
ENSMUSG00000021619	Atg10	39.68	36.79	65.58	53.45	25.98	0	2.48	17.98	-2.854	0.0346013
ENSMUSG00000057672	Pkn1	97.47	66.81	74.08	75.19	7.28	0	23.53	33.61	-2.855	0.0100117
ENSMUSG00000062729	Ppox	20.89	24.21	19.43	15.4	11.43	0	0	10.16	-2.858	0.0446009
ENSMUSG00000050777	Tmem37	312.6	319.51	302.37	172.12	51.97	0	49.54	72.69	-2.87	0.0157171
ENSMUSG00000006191	Cdkal1	46.65	21.3	46.15	49.82	33.26	0	0	24.23	-2.875	0.031828
ENSMUSG00000094870	Zfp131	171.96	208.16	211.3	196.58	154.86	50.54	0	18.76	-2.893	0.0458115
ENSMUSG00000021268	Meg3	1498.93	1793.12	2035.25	1684.08	376.25	69.26	211.78	365.02	-2.899	0.00286671
ENSMUSG00000046573	Lyrm4	69.62	61	32.79	53.45	21.83	1.87	28.48	0.78	-2.904	0.0459494
ENSMUSG00000030720	Cln3	29.94	17.43	31.57	57.98	3.12	1.87	1.24	25.01	-2.912	0.00625574
ENSMUSG00000026942	Traf2	37.6	45.51	68	38.05	4.16	0	12.38	16.41	-2.922	0.0130922
ENSMUSG00000112908	AC126687.1	21.58	23.24	9.71	9.96	5.2	1.87	1.24	0.78	-2.925	0.0204982
ENSMUSG00000035392	Dennd1a	35.51	40.66	41.29	28.08	13.51	0	1.24	17.2	-2.929	0.0297812
ENSMUSG00000021027	Ralgapa1	59.18	67.77	92.29	43.48	8.31	1.87	42.11	3.91	-2.949	0.00244582
ENSMUSG00000033207	Mamdc2	22.28	28.08	14.57	25.37	8.31	0	0	16.41	-2.955	0.0279053
ENSMUSG00000038302	Afg1l	22.28	1.94	13.36	9.96	16.63	0	1.24	0	-2.963	0.0467397
ENSMUSG00000026649	Cfap126	18.8	15.49	13.36	19.02	0	1.87	1.24	14.85	-2.969	0.0276275
ENSMUSG00000061046	Haghl	74.49	53.25	81.36	83.34	23.91	0	2.48	52.37	-2.979	0.0122421
ENSMUSG00000033701	Acbd6	112.79	97.79	72.86	102.37	56.12	1.87	2.48	28.14	-2.988	0.00277157
ENSMUSG00000046532	Ar	106.52	101.66	74.08	67.04	85.23	1.87	0	32.05	-2.997	0.0493572
ENSMUSG00000091243	Vgll3	112.79	133.61	129.94	119.58	74.83	0	2.48	75.04	-3.033	0.0449186
ENSMUSG00000097412	1810014B01Rik	4.87	0.97	7.29	15.4	0	0	0	10.94	-3.034	0.0431685
ENSMUSG00000063873	Slc24a3	103.04	54.22	30.36	53.45	73.79	3.74	1.24	3.91	-3.041	0.00713148
ENSMUSG00000058729	Lin9	46.65	37.76	19.43	30.8	14.55	0	0	24.23	-3.05	0.0409905
ENSMUSG00000005899	Smpd4	33.42	10.65	29.14	28.99	9.35	0	0	14.07	-3.089	0.0184844
ENSMUSG00000020577	Tspan13	94.68	139.42	153.01	44.39	38.46	1.87	65.64	0.78	-3.103	0.0302959
ENSMUSG00000089992	G6pd2	10.44	3.87	10.93	18.12	0	0	4.95	2.34	-3.104	0.0418757
ENSMUSG00000029208	Guf1	63.35	34.86	46.15	26.27	25.98	0	1.24	8.6	-3.109	0.00992683
ENSMUSG00000028573	Fggy	40.38	80.36	43.72	62.51	7.28	1.87	2.48	24.23	-3.11	0.019254
ENSMUSG00000022231	Sema5a	80.76	51.31	42.5	43.48	36.38	3.74	2.48	3.13	-3.111	0.000158551
ENSMUSG00000057219	Armc7	14.62	24.21	25.5	7.25	1.04	1.87	4.95	0.78	-3.117	0.0224917
ENSMUSG00000079084	Ccdc82	9.05	12.59	10.93	12.68	0	0	2.48	4.69	-3.151	0.00280351
ENSMUSG00000032475	Nck1	68.23	56.16	48.57	63.41	5.2	3.74	2.48	27.36	-3.19	0.00316281
ENSMUSG00000002845	Tmem39a	29.24	32.92	44.93	45.3	11.43	0	0	30.48	-3.193	0.0290138
ENSMUSG00000038365	Fbxo25	48.73	53.25	42.5	72.47	40.53	3.74	1.24	4.69	-3.21	0.0442169
ENSMUSG00000028407	Toporsos	38.99	76.49	47.36	53.45	0	58.03	2.48	7.82	-3.217	0.0100873
ENSMUSG00000043760	Pkhd1	25.76	4.84	20.64	11.78	7.28	0	3.72	0	-3.248	0.0241838
ENSMUSG00000024206	Rfx2	18.8	22.27	15.79	6.34	6.24	0	0	2.34	-3.264	0.0369104
ENSMUSG00000051864	Tbc1d22a	99.56	32.92	77.72	100.56	17.67	0	1.24	64.09	-3.267	0.0216284
ENSMUSG00000024743	Syt7	9.05	5.81	6.07	4.53	0	1.87	1.24	0	-3.271	0.0174024
ENSMUSG00000032564	Cpne4	6.27	8.71	8.5	10.87	5.2	0	0	0.78	-3.273	0.0400632
ENSMUSG00000051910	Sox6	45.25	60.03	75.29	39.86	8.31	9.36	12.38	0	-3.284	0.00397456
ENSMUSG00000036568	Bicral	35.51	49.38	19.43	26.27	9.35	0	2.48	3.13	-3.297	0.0266207
ENSMUSG00000097203	4732419C18Rik	8.35	4.84	6.07	4.53	7.28	0	0	0	-3.315	0.0309376
ENSMUSG00000001173	Ocrl	86.33	44.54	52.22	42.58	10.39	0	2.48	25.01	-3.328	0.0294357
ENSMUSG00000026885	Ttll11	41.08	30.01	21.86	25.37	14.55	0	11.15	0	-3.335	0.0122551
ENSMUSG00000026179	Pnkd	311.2	132.64	116.58	184.81	63.4	1.87	1.24	128.19	-3.348	0.0413299
ENSMUSG00000051498	Tlr6	41.08	47.44	61.93	50.73	16.63	0	0	31.27	-3.35	0.0309362
ENSMUSG00000037190	Cyb561d2	41.08	28.08	13.36	16.31	4.16	0	1.24	4.69	-3.355	0.0376946
ENSMUSG00000103548	Gm37670	25.06	7.75	19.43	20.84	4.16	0	0	7.03	-3.361	0.0140484
ENSMUSG00000015709	Arnt2	66.14	84.23	60.72	42.58	30.14	0	0	28.92	-3.385	0.0498117
ENSMUSG00000042842	Serpinb6b	16.71	14.52	10.93	20.84	0	0	2.48	7.03	-3.404	0.0046771
ENSMUSG00000026399	Cd55	3.48	5.81	8.5	15.4	0	0	0	10.94	-3.406	0.014532
ENSMUSG00000036879	Phkb	41.77	84.23	64.36	62.51	34.3	0	2.48	8.6	-3.424	0.048751
ENSMUSG00000099492	Gm5525	8.35	15.49	7.29	10.87	2.08	0	0	1.56	-3.5	0.0188362
ENSMUSG00000033578	Tmem35a	36.9	26.14	25.5	13.59	24.94	0	1.24	0.78	-3.505	0.0149998
ENSMUSG00000022306	Zfpm2	7.66	7.75	2.43	25.37	0	0	0	11.72	-3.518	0.0414111
ENSMUSG00000061576	Dpp6	67.53	173.31	72.86	179.37	2.08	0	16.1	68.78	-3.53	0.0318816
ENSMUSG00000064586	Gm25132	22.97	67.77	82.58	28.99	0	16.85	32.2	0	-3.536	0.0131023
ENSMUSG00000031381	Piga	66.84	47.44	42.5	45.3	21.83	0	0	14.85	-3.554	0.0016235
ENSMUSG00000060594	Layn	30.63	30.01	25.5	24.46	0	1.87	2.48	9.38	-3.561	0.00585574
ENSMUSG00000107283	Mpv17	189.37	207.2	163.94	239.16	46.77	1.87	1.24	154.76	-3.561	0.00962528
ENSMUSG00000078444	Gm10941	4.87	8.71	7.29	8.15	0	0	0	6.25	-3.601	0.0316792
ENSMUSG00000035759	Bbs10	8.35	20.33	19.43	8.15	1.04	0	6.19	0	-3.655	0.0263229
ENSMUSG00000048078	Tenm4	31.33	42.6	18.22	34.42	3.12	1.87	3.72	0.78	-3.729	0.0132943
ENSMUSG00000039529	Atp8b1	9.75	6.78	10.93	14.49	2.08	0	1.24	0	-3.797	0.0112044
ENSMUSG00000039601	Rcan2	34.81	9.68	10.93	40.77	1.04	0	0	23.45	-3.893	0.0480191
ENSMUSG00000020325	Fstl3	25.76	28.08	15.79	24.46	0	3.74	0	7.03	-3.939	0.00352503
ENSMUSG00000034295	Fhod3	26.46	17.43	15.79	42.58	1.04	0	0	30.48	-3.97	0.00809397
ENSMUSG00000104871	Gm42639	13.23	20.33	36.43	28.99	1.04	0	1.24	3.91	-4.06	0.0169144
ENSMUSG00000105019	Gm43547	3.48	13.55	15.79	17.21	0	0	0	8.6	-4.081	0.0324256
ENSMUSG00000034438	Gbp8	8.35	46.47	32.79	36.24	2.08	0	0	6.25	-4.098	0.0407078
ENSMUSG00000021391	Cenpp	20.19	21.3	3.64	15.4	3.12	0	0	0.78	-4.107	0.03294
ENSMUSG00000044951	Mylk4	119.05	275.94	261.09	256.37	80.03	0	0	90.67	-4.166	0.0425293
ENSMUSG00000083325	Gm14121	21.58	56.16	49.79	25.37	1.04	0	1.24	10.16	-4.219	0.0404767
ENSMUSG00000024827	Gldc	11.84	8.71	17	7.25	7.28	0	0	0	-4.245	0.0395352
ENSMUSG00000038742	Angptl6	9.05	17.43	13.36	7.25	0	0	8.67	0	-4.271	0.0399598
ENSMUSG00000021245	Mlh3	7.66	17.43	14.57	29.89	2.08	0	1.24	0	-4.32	0.0471101
ENSMUSG00000027947	Il6ra	13.23	13.55	4.86	7.25	0	0	2.48	0	-4.433	0.0421105
ENSMUSG00000042429	Adora1	7.66	25.17	31.57	21.74	3.12	1.87	0	0	-4.436	0.0374214
ENSMUSG00000074629	4930518I15Rik	9.05	30.98	34	22.65	6.24	1.87	0	0	-4.448	0.0481333
ENSMUSG00000033182	Kbtbd12	15.32	32.92	9.71	7.25	0	13.1	0	0	-4.457	0.0191957
ENSMUSG00000084744	Gm25291	4.87	12.59	8.5	5.44	0	0	1.24	0	-4.459	0.0233267
ENSMUSG00000026707	Nsun6	16.71	11.62	17	10.87	12.47	0	0	0	-4.485	0.0249432
ENSMUSG00000083049	Gm14822	12.53	50.35	38.86	62.51	0	0	11.15	2.34	-4.499	0.039721
ENSMUSG00000048096	Lmod1	28.54	11.62	19.43	7.25	10.39	0	0	0	-4.501	0.0158985
ENSMUSG00000058728	Cd300c	9.75	17.43	8.5	20.84	0	0	0	4.69	-4.558	0.0103091
ENSMUSG00000091370	5730435O14Rik	4.18	13.55	6.07	11.78	1.04	0	0	0	-4.592	0.0379711
ENSMUSG00000002944	Cd36	21.58	35.82	9.71	12.68	2.08	0	0	0.78	-4.611	0.0474104
ENSMUSG00000035184	Fam124a	13.23	22.27	14.57	25.37	0	0	0	21.89	-4.634	0.0403078
ENSMUSG00000034278	Dnajc17	25.06	40.66	23.07	19.02	0	0	1.24	3.91	-4.675	0.0177739
ENSMUSG00000100481	Gm7114	17.41	13.55	20.64	24.46	0	0	0	18.76	-4.741	0.0211227
ENSMUSG00000070476	Fam217b	41.08	24.21	15.79	22.65	4.16	0	0	0.78	-4.819	0.0114904
ENSMUSG00000100680	1810044D09Rik	13.23	10.65	23.07	11.78	4.16	0	0	0	-4.819	0.0235026
ENSMUSG00000050605	Zfp61	20.19	13.55	18.22	14.49	0	0	0	7.03	-4.851	0.0134776
ENSMUSG00000072591	5930412G12Rik	15.32	21.3	14.57	9.06	0	0	0	3.13	-4.89	0.0203374
ENSMUSG00000045103	Dmd	132.28	253.67	149.37	139.51	63.4	0	11.15	0	-4.996	0.0295024
ENSMUSG00000027281	Slx4ip	16.01	13.55	23.07	32.61	0	0	13.62	0	-5.103	0.0388845
ENSMUSG00000105561	Gm43462	4.87	19.36	18.22	8.15	0	0	1.24	0	-5.116	0.0378151
ENSMUSG00000024998	Plce1	55	50.35	71.65	17.21	8.31	0	1.24	0	-5.177	0.0245017
ENSMUSG00000036030	Prtg	6.96	16.46	19.43	8.15	0	0	1.24	0	-5.192	0.0222911
ENSMUSG00000030826	Bcat2	18.1	9.68	17	6.34	1.04	0	0	0	-5.274	0.0187409
ENSMUSG00000031379	Pir	12.53	17.43	8.5	21.74	0	0	1.24	0	-5.392	0.018021
ENSMUSG00000031098	Syt8	16.01	15.49	43.72	38.05	0	0	0	5.47	-5.41	0.0293057
ENSMUSG00000024525	Impa2	53.61	17.43	46.15	52.54	37.42	0	0	0	-5.582	0.039849
ENSMUSG00000060427	Zfp868	16.01	23.24	20.64	9.96	1.04	0	0	0	-5.639	0.0102185
ENSMUSG00000004895	Prcc	13.92	24.21	27.93	23.55	2.08	0	0	0	-5.673	0.00814666
ENSMUSG00000109239	Gm45176	25.76	52.28	48.57	34.42	0	0	0	13.29	-5.674	0.0183692
ENSMUSG00000001930	Vwf	24.37	24.21	19.43	9.06	1.04	0	0	0	-5.814	0.0120092
ENSMUSG00000053897	Slc39a8	7.66	6.78	12.14	4.53	0	0	0	0	-5.89	0.0165282
ENSMUSG00000108920	Gm44678	10.44	8.71	6.07	8.15	0	0	0	0	-6.075	0.00266343
ENSMUSG00000091577	Gm6211	4.18	11.62	7.29	12.68	0	0	0	0	-6.124	0.0200042
ENSMUSG00000040093	Bmf	10.44	21.3	10.93	4.53	0	0	0	0	-6.319	0.0428908
ENSMUSG00000104704	Gm43133	15.32	12.59	7.29	11.78	0	0	0	0	-6.557	0.00587511
ENSMUSG00000103959	Gm37720	9.05	12.59	15.79	19.02	0	0	0	0	-6.84	0.00707658
ENSMUSG00000034265	Zdhhc14	16.71	29.05	10.93	9.06	0	0	0	0	-6.855	0.0355928
ENSMUSG00000010538	Tsacc	11.14	21.3	13.36	19.02	0	0	0	0	-6.987	0.00643277
ENSMUSG00000051238	Swsap1	12.53	29.05	15.79	12.68	0	0	0	0	-6.991	0.0208726
ENSMUSG00000040812	Agbl2	4.87	29.05	24.29	26.27	0	0	0	0	-7.274	0.0312071
ENSMUSG00000031220	Awat2	13.92	21.3	26.72	23.55	0	0	0	0	-7.403	0.00430098
ENSMUSG00000105431	Gm42640	22.97	9.68	24.29	31.71	0	0	0	0	-7.554	0.0168724
