# Supplementary material for: Epigenetic regulation of Wnt7b expression by the cis-acting long noncoding RNA Lnc-Rewind in muscle stem cells
Source: eLife. 2021 Jan 12;10:e54782. doi: 10.7554/eLife.54782 (PMC7837680; doi:10.7554/eLife.54782)
Supplement: Figure 2—source data 2. [file elife-54782-fig2-data2.xlsx]

## Sheet: sheet
2E	MuSCs Wt KD Lnc-Rewind
	EdU quantification		Scr					KD Lnc-Rewind
			DAPI	EdU	%EdU/DAPI			DAPI	EdU	%EdU/DAPI
	Wt1	Foto2	52	16	30.7692		Foto1	158	32	20.2532
		Foto3	44	12	27.2727		Foto2	92	9	9.78261
		Foto4	85	24	28.2353		Foto6	151	28	18.543
		Foto5	169	83	49.1124		Foto7	229	55	24.0175
		Foto6	119	60	50.4202		Foto8	165	33	20
		Foto10	55	27	49.0909		Foto9	178	53	29.7753
		Foto11	60	26	43.3333		Foto10	180	40	22.2222				Scr	20.391
		Foto12	161	65	40.3727		Foto11	187	32	17.1123				KD	9.15493
		Foto13	126	53	42.0635		Foto12	172	40	23.2558			SEM	Scr	1.97698
		Foto14	74	37	50		Foto13	18	3	16.6667				KD	1.21623
		Foto15	45	29	64.4444		Foto14	160	58	36.25
		Foto16	59	36	61.0169		Foto15	60	10	16.6667				T-test	3.76983e-06
		Foto17	72	45	62.5		Foto16	121	29	23.9669					***
	Wt2	Foto 1	816	241	29.5343		Foto 1	565	104	18.4071
		Foto 2	426	112	26.2911		Foto 2	532	112	21.0526
		Foto 3	559	145	25.9392		Foto 3	593	133	22.4283
		Foto 4	655	188	28.7023		Foto 4	604	133	22.0199
		Foto 5	818	247	30.1956		Foto 5	488	59	12.0902
		Foto 6	903	257	28.4607		Foto 6	581	126	21.6867
		Foto 7	775	220	28.3871		Foto 7	572	111	19.4056
		Foto 8	879	213	24.2321		Foto 8	512	107	20.8984
		Foto 9	478	108	22.5941		Foto 9	538	121	22.4907
		Foto 10	560	141	25.1786		Foto 10	554	84	15.1625
	wt3	Foto 1	183	13	7.10383		Foto 1	14	1	7.14286
		Foto 2	136	11	8.08824		Foto 2	17	1	5.88235
		Foto 4	152	10	6.57895		Foto 3	7	1	14.2857
		Foto 6	188	13	6.91489		Foto 4	22	0	0
		Foto 7	242	25	10.3306		Foto 5	19	0	0
		Foto 8	287	27	9.40767		Foto 6	17	0	0
		Foto 9	285	34	11.9298		Foto 7	20	0	0
		Foto 10	245	22	8.97959		Foto 8	15	1	6.66667
		Foto 11	393	41	10.4326		Foto 9	36	1	2.77778
		Foto 12	329	42	12.766		Foto 10	44	1	2.27273
	wt4	Foto 1	138	8	5.7971		Foto 1	47	0	0
		Foto 2	133	9	6.76692		Foto 2	177	2	1.12994
		Foto 4	269	21	7.80669		Foto 3	183	6	3.27869
		Foto 5	624	84	13.4615		Foto 4	102	3	2.94118
		Foto 6	317	26	8.20189		Foto 5	83	1	1.20482
		Foto 7	284	17	5.98592		Foto 6	94	0	0
		Foto 8	229	25	10.917		Foto 7	227	3	1.32159
		Foto 9	200	11	5.5		Foto 8	195	1	0.512821
		Foto 10	240	28	11.6667		Foto 9	106	3	2.83019
		Foto 11	220	24	10.9091		Foto 10	14	0	0
	Wt5	Foto 1	210	17	8.09524		Foto 1	124	1	0.806452
		Foto 2	179	16	8.93855		Foto 2	137	0	0
		Foto 3	196	18	9.18367		Foto 3	94	0	0
		Foto 4	215	21	9.76744		Foto 4	64	0	0
		Foto 5	221	15	6.78733		Foto 5	14	1	7.14286
		Foto 6	264	34	12.8788		Foto 6	149	2	1.34228
		Foto 7	217	22	10.1382		Foto 7	67	1	1.49254
		Foto 8	216	28	12.963		Foto 8	66	0	0
		Foto 9	275	40	14.5455		Foto 9	46	0	0
		Foto 10	259	49	18.9189		Foto 10	81	3	3.7037
	Wt6	Foto 1	372	60	16.129		Foto 1	69	1	1.44928
		Foto 2	393	56	14.2494		Foto 2	125	4	3.2
		Foto 3	389	57	14.653		Foto 3	109	2	1.83486
		Foto 4	367	41	11.1717		Foto 4	97	8	8.24742
		Foto 5	294	32	10.8844		Foto 5	91	2	2.1978
		Foto 6	429	69	16.0839		Foto 6	119	3	2.52101
		Foto 7	292	37	12.6712		Foto 7	142	2	1.40845
		Foto 8	314	23	7.32484		Foto 8	267	21	7.86517
		Foto 9	318	36	11.3208		Foto 10	136	7	5.14706
		Foto 10	293	30	10.2389		Foto 11	100	2	2
					Mean %	SEM		10946		Mean %	SEM	T-test
	TOT N6		18797		20.391	1.97698				9.15493	1.21623	6.13119e-14
												***
2F	Single Myofibers
	% PAX7+/Ki67+ per cluster		Cluster/foto	DAPI	PAX7+	Ki67+	% PAX7+/Ki67+ per cluster			Cluster/foto	DAPI	PAX7+	Ki67+	% PAX7+/Ki67+ per cluster
		Rep 1	1	6	6	6	100		Rep 1	1	2	2	2	100
			1.1	4	4	4	100			2	9	9	5	55.5556
			2	2	2	2	100			3	6	6	6	100
			6	7	7	6	85.7143			4	2	2	2	100
			7	5	5	4	80			5	10	10	8	80				N:3
			8	2	2	2	100			6	2	2	1	50					Scr	KD
			9	7	7	7	100			7	2	2	1	50				PAX7+/Ki67+	94.6629	85.6368
			10	7	7	6	85.7143			8	9	9	6	66.6667				PAX7+/Ki67-	5.33712	14.3632
			11	2	2	2	100			9	1	1	1	100
			12	2	2	2	100			10	6	6	2	33.3333
			13	2	2	2	100			11	2	2	2	100				SEM (PAX7+/Ki67+)	1.54959	3.35348
			14	5	5	5	100			12	2	2	2	100
			15	4	4	4	100			13	6	6	4	66.6667				t.test	0.00719812
			16	2	2	2	100			14	2	2	1	50					**
			17	2	2	2	100			15	1	1	1	100
			18	8	8	4	50			16	7	7	4	57.1429
			19	2	2	2	100			17	6	6	2	33.3333
			20	9	9	7	77.7778		Rep2	1	4	4	4	100
			21	4	4	4	100		Rep3	1	3	3	3	100
		Rep2	1	2	2	2	100			2	4	4	4	100
			1.2	2	2	2	100			3	3	3	3	100
			1.2	2	2	2	100			4	3	3	3	100
			2	5	5	5	100			5	3	3	3	100
			2.1	2	2	2	100				2	2	2	100
			3	2	2	2	100			6	4	4	4	100
			4	3	3	3	100			7	2	2	2	100
			5	2	2	1	50				2	2	1	50
			6	2	2	2	100			8	4	4	4	100
			7	1	1	1	100			9	2	2	2	100
			8	1	1	1	100			10	6	6	5	83.3333
			9	3	3	3	100				2	2	2	100
			10	4	4	4	100			11	7	7	7	100
			11	3	3	3	100			12	3	3	3	100
			12	6	6	6	100			13	4	4	3	75
			13	2	2	2	100			14	7	7	6	85.7143
			14	4	4	4	100				2	2	2	100
		Rep3	1	2	2	2	100				3	3	3	100
				2	2	2	100			17	4	4	4	100
			2	2	1	1	100			18	10	10	6	60
			3	2	2	2	100			19	2	2	2	100
			4	2	2	2	100			20	2	2	2	100
				2	2	2	100			21	1	1	1	100
			5	8	8	7	87.5
				4	4	2	50			37	164
				3	3	2	66.6667							Mean %	SEM	t.test Scr/KD
				4	4	3	75							85.6368	3.35348	2.3865e-54
				7	7	7	100
				6	6	6	100
				5	5	5	100
				2	2	2	100
			6	2	2	2	100
				6	6	5	83.3333
			7	4	4	4	100
			8	7	7	5	71.4286
			9	2	2	2	100
			10	5	5	5	100
				2	2	2	100
			11	6	6	6	100
			12	5	5	5	100
			13	13	13	11	84.6154
			14	8	8	8	100
			15	7	7	7	100
			16	4	4	4	100
			17	2	2	2	100
			18	2	2	2	100
				2	2	2	100
			54	256			Mean %
							94.6629	SEM
							1.54959
2G	Single myofibers
	Total Pax7			Sum per fiber
				SCR			KD
				0			2
				20			0
				1			8
				0			0
				10			6
				7			0
				6			5
				0			1			Fibers Wt 96h
				10			8		GAP-SCR	5.31111
				16			0		GAP-REW	2.67188
				3			0
				1			0	SEM	GAP-SCR	1.38492
				21			7		GAP-REW	0.589699
				1			0
				2			0		T-Test	0.0542672
				4			1			*
				1			0
				2			1
				0			10
				0			0
				8			0
				1			0
				4			0
				4			7
				0			0
				0			4
				0			0
				0			4
				6			6
				0			3
				2			0
				0			0
				0			8
				0			3
				55			0
				7			10
				7			0
				5			0
				13			0
				0			10
				0			25
				8			0
				11			0
				0			0
				3			0
							0
							0
							0
							0
							6
							4
							0
							0
							12
							17
							0
							0
							0
							0
							0
							2
							1
							0
							0
			TOT	239		TOT	171
			Mean	5.31111		Mean	2.67188
			SEM	1.38492		SEM	0.589699
						T-test	0.0542672
2G	Single myofibers			Scr						KD
	Cluster/Pairs/Single			Fiber	Cluster	Pairs	Single			Fiber	Cluster	Pairs	Single
			Rep1	1	2	0	0		Rep1	1	0	1	0
				1	2	2	0			1	1	4	0		TOT		Cluster	Pairs	Single
				1	1	0	0			1	0	1	0			Scr	0.852941	1.0625	0.30303
				1	1	3	0			1	0	0	0			KD	0.533333	0.52809	0.59375
				1	0	0	0			1	1	1	0
				1	0	0	0			1	0	0	0		SEM	Scr	0.165327	0.218076	0.0807012
				1	0	0	0			1	0	0	0			KD	0.138838	0.131862	0.167919
				1	0	0	0			1	0	0	0			T.test	Cluster Scr/KD	Pairs Scr/KD	Single Scr/KD
				1	1	6	0			1	0	0	0				0.0100476	0.00225442	0.248898
				1	1	7	0			1	0	1	0				**	***
			Rep2	1	0	0	0			1	1	1	0
				1	2	4	0			1	1	0	0
				1	0	1	1			1	0	0	0
				1	0	0	0			1	0	0	0
				1	0	1	0			1	0	0	0
				1	0	1	0			1	0	1	0
				1	0	1	0			1	0	1	0
				1	0	0	1			1	0	0	0
				1	0	0	0			1	0	0	0
				1	0	0	0			1	0	0	0
				1	0	0	0			1	0	0	0
				1	0	0	2			1	1	1	0
				1	0	0	0			1	0	0	0
				1	2	0	0			1	0	0	0
				1	1	0	0			1	0	0	0
				1	0	1	0			1	0	1	0
				1	0	0	0			1	0	0	0
				1	1	0	0			1	0	0	0
			Rep3	1	0	0	0			1	0	0	0
				1	0	0	0			1	0	0	0
				1	0	3	0			1	0	0	0
				1	0	0	0			1	0	0	0
				1	0	1	0			1	1	0	0
				1	0	0	0			1	0	0	0
				1	0	0	0			1	0	1	0
				1	0	0	0			1	0	0	0
				1	9	4	0		Rep2	1	1	0	0
				1	1	0	0			1	0	0	0
				1	2	2	0			1	0	0	0
				1	1	0	0			1	0	0	0
				1	1	0	0			1	0	0	0
				1	0	0	0		Rep3	1	2	0	1
				1	0	0	0			1	1	0	0
				1	1	0	0			1	0	0	0
				1	2	0	0			1	2	1	2
				1	0	0	0			1	0	0	0
				1	0	1	1			1	0	0	0
				1	0	2	0			1	0	0	0
				1	0	0	0			1	1	2	2
			Rep4	1	1	3	0			1	3	2	4
				1	1	2	0			1	0	0	0
				1	1	0	0			1	0	0	0
				1	0	1	0			1	0	0	0
				1	0	0	0			1	0	0	0
				1	0	0	0			1	0	0	0
			Rep5	1	1	0	0			1	0	0	0
				1	4	2	1			1	0	0	0
				1			1			1	0	0	0
				1	3	1	2			1	1	1	1
				1	1	1	2			1	1	0	0
				1	1					1	0	0	0
				1	1		3			1	0	0	0
				1	2					1	2	1	0
				1	1		1			1	3	1	1
				1	1	1	1			1	0	0	0
				1	2					1	0	0	0
				1	3	6	2			1	0	0	0
				1						1	0	0	0
				1		1	1			1	0	0	0
				1						1	0	1	0
				1		6				1	0	0	1
				1	2	4	1			1	0	0	0
				1	2					1	0	0	0
									Rep4	1	1	0	0
			Tot	N:	Mean Cluster per fiber	Mean pairs per fiber	Mean single per fiber			1	0	0	0
				73	0.852941	1.0625	0.30303			1	0	0	0
				SEM	0.165327	0.218076	0.0807012			1	0	1	2
										1	0	0	0
									Rep5	1			3
										1	1
										1			1
										1
										1			1
										1
										1		2	2
										1
										1
										1
									4	1	1
										1
									5	1	1
										1
										1	1
										1
										1
										1
										1
									8	1		1	3
										1
										1		1	4
										1		1	1
										1
									9	1		1
										1
										1
									10	1	2	3
										1			2
										1	1		1
										1	1		1
										1	1		2
										1
										1			2
										1		1	2
										1
										1	2	1	1
										1	1
										1	1
										1
										1		1
									11	1		1
										1			1
										1			1
										1			1
									Tot	N:	Mean Cluster per fiber	Mean pairs per fiber	Mean single per fiber
										123	0.41573	0.420455	0.452632
										SEM	0.0746271	0.077043	0.0919716
