# Supplementary material for: Epigenetic regulation of Wnt7b expression by the cis-acting long noncoding RNA Lnc-Rewind in muscle stem cells
Source: eLife. 2021 Jan 12;10:e54782. doi: 10.7554/eLife.54782 (PMC7837680; doi:10.7554/eLife.54782)
Supplement: Figure 3—figure supplement 1—source data 1. [file elife-54782-fig3-figsupp1-data1.xlsx]

## Sheet: Sheet1
3A
MuSCs Wt
Wnt7b	N4	Sample	Ct-GOI	Ct-GAPDH					Wnt7b
		WT1 scr	26.8508	16.9288	9.92201	0	Rep1	WT1 scr	1					SCR	KD
		WT1 KD	25.9743	17.7976	8.17669	-1.74532		WT1 KD	3.35269				rep1	1	3.35269	ttest
		WT1 scr	27.3576	18.4272	8.93045	0	Rep2	WT1 scr	1				rep2	1	2.35215	0.00141655
		WT1 KD	25.2194	17.5229	7.69647	-1.23398		WT1 KD	2.35215				rep3	1	3.71123
		WT2 scr	26.547	17.3452	9.20178	0	Rep3	WT2 scr	1				rep4	1	2.35129
		WT2 KD	25.1936	17.8837	7.30988	-1.8919		WT2 KD	3.71123
		WT3 scr	27.5618	17.0386	10.5232	0	Rep4	WT3 scr	1
		WT3 KD	27.1313	17.8415	9.28974	-1.23345		WT3 KD	2.35129
3B
	EnsemblGeneID	Symbol	SCRexp1	SCRexp2	SCRexp3	SCRexp4	GAPexp1	GAPexp2	GAPexp3	GAPexp4	logFC_EXPvsCTR	FDR_EXPvsCTR	T-Test paired
	ENSMUSG00000054863	Fam19a5	92.6	174.28	63.15	124.11	80.03	89.85	32.2	103.96	-0.591	0.655	0.107023
	ENSMUSG00000051864	Tbc1d22a	99.56	32.92	77.72	100.56	17.67	0	1.24	64.09	-3.267	0.076	0.0216284
	ENSMUSG00000035891	Cerk	38.99	47.44	20.64	71.57	58.2	284.54	45.82	53.15	0.952	0.54	0.338683
	ENSMUSG00000035900	Gramd4	11.14	45.51	27.93	17.21	10.39	0	59.45	7.03	-1.074	0.782	0.720496
	ENSMUSG00000022386	Trmu	16.71	23.24	12.14	50.73	42.61	3.74	64.4	24.23	0.114	0.983	0.69723
	ENSMUSG00000022385	Gtse1	44.56	99.73	55.86	72.47	164.22	361.29	61.92	59.4	0.911	0.482	0.235378
	ENSMUSG00000064284	Cdpf1	48.73	50.35	55.86	24.46	18.71	54.29	14.86	16.41	-0.931	0.679	0.163156
	ENSMUSG00000022382	Wnt7b	137.85	57.12	35.22	122.3	239.05	151.63	105.27	181.34	1.068	0.235	0.0038696
	ENSMUSG00000016541	Atxn10	429.56	399.87	365.52	528.14	341.95	400.6	286.09	396.28	-0.277	0.696	0.0737791
	ENSMUSG00000006369	Fbln1	61.27	15.49	8.5	23.55	31.18	3.74	0	46.9	-1.313	0.68	0.586232
	ENSMUSG00000022434	Fam118a	9.75	40.66	26.72	28.08	8.31	0	58.21	10.16	-1.163	0.759	0.670465
	ENSMUSG00000016619	Nup50	217.22	279.81	348.52	243.69	215.15	565.33	401.27	369.71	0.449	0.531	0.161296
	ENSMUSG00000036106	Prr5	6.27	0	3.64	3.62	25.98	0	39.63	23.45	2.579	0.406	0.082921
	ENSMUSG00000022438	Parvb	279.18	285.62	217.37	327.94	245.29	494.2	158.53	317.34	0.023	0.988	0.69784
	ENSMUSG00000022437	Samm50	826.4	547.04	771.11	977.48	703.64	271.44	402.5	699.56	-0.662	0.149	0.0143918
	ENSMUSG00000016757	Ttll12	181.01	228.5	262.3	254.56	198.52	394.99	307.14	182.12	0.164	0.882	0.485671
3C	MuSCs Wt Rescue
	N4					ΔCt	ΔΔCt	fold change	Media FC	SEM				Lnc Rewind
		Lnc Rewind	Scr + Ctr	Wt1	Scr+Ctr	11.2985	0	1	0.592876	0.150914			Scr+Ctr	0.592876
				Wt2	Scr+Ctr	11.9465	0.647944	0.638189					KD	0.176302
				Wt3	Scr+Ctr	12.5978	1.29926	0.406334					KD+ siWnt7b	0.155688
				Wt4	Scr+Ctr	12.9112	1.61272	0.326982				SEM	Scr+Ctr	0.150914
			KD	Wt1	KD	13.9207	2.62222	0.162418	0.176302	0.0102087			KD	0.0102087
				Wt2	KD	13.9385	2.64003	0.160425					KD+ siWnt7b	0.0341963
				Wt3	KD	13.5873	2.28875	0.204653
				Wt4	KD	13.7909	2.49239	0.177712
			KD+ siWnt7b	Wt1	KD+ siWnt7b	14.6195	3.32094	0.100068	0.155688	0.0341963		Tukey's multiple comparisons test	Mean Diff,	95,00% CI of diff,	Significant?	Summary	Adjusted P Value
				Wt2	KD+ siWnt7b	14.2111	2.91264	0.132803				siCtrl vs. KD	0.4166	0,06305 to 0,7701	Yes	*	0.023
				Wt3	KD+ siWnt7b	13.2671	1.96863	0.255496				siCtrl vs. KD siWnt7b	0.4372	0,08367 to 0,7907	Yes	*	0.0179
				Wt4	KD+ siWnt7b	14.194	2.89554	0.134387				KD vs. KD siWnt7b	0.02061	-0,3329 to 0,3741	No	ns	0.9855
	N4					ΔCt	ΔΔCt	fold change	Media FC	SEM				Wnt7b
		Wnt7b	Scr + Ctr	Wt1	Scr+Ctr	9.39857	0	1	1.00257	0.134859			Scr+Ctr	1.00257
				Wt2	Scr+Ctr	8.97014	-0.428429	1.34577					KD	1.81074
				Wt3	Scr+Ctr	9.43076	0.0321865	0.977937					KD+ siWnt7b	0.785262
				Wt4	Scr+Ctr	9.94106	0.542488	0.686586				SEM	Scr+Ctr	0.134859
			KD	Wt1	KD	8.73295	-0.665624	1.58625	1.81074	0.241063			KD	0.241063
				Wt2	KD	9.08113	-0.317443	1.24612					KD+ siWnt7b	0.119923
				Wt3	KD	8.19887	-1.1997	2.29692
				Wt4	KD	8.31881	-1.07976	2.11369
			KD+ siWnt7b	Wt1	KD+ siWnt7b	9.93471	0.536136	0.689616	0.785262	0.119923		Tukey's multiple comparisons test	Mean Diff,	95,00% CI of diff,	Significant?	Summary	Adjusted P Value
				Wt2	KD+ siWnt7b	10.1439	0.745302	0.596543				siCtrl vs. KD	-0.8082	-1,495 to -0,1217	Yes	*	0.0232
				Wt3	KD+ siWnt7b	9.21401	-0.18456	1.13647				siCtrl vs. KD siWnt7b	0.2173	-0,4692 to 0,9038	No	ns	0.6633
				Wt4	KD+ siWnt7b	9.87568	0.477102	0.718419				KD vs. KD siWnt7b	1.025	0,3390 to 1,712	Yes	**	0.0061
