# Supplementary material for: Epigenetic regulation of Wnt7b expression by the cis-acting long noncoding RNA Lnc-Rewind in muscle stem cells
Source: eLife. 2021 Jan 12;10:e54782. doi: 10.7554/eLife.54782 (PMC7837680; doi:10.7554/eLife.54782)
Supplement: Figure 3—source data 1. [file elife-54782-fig3-data1.xlsx]

## Sheet: TSS_Usage_Data
Figure3-Source Data1: 5'CAGE TSS expression profile of Wnt7b, Lnc-Rewind, Atxn10 and Cdpf1 genes. The table shows the relative logarithmic expression (rle) values of the Transcriptional Start Site (TSS) of Wnt7b, Lnc-Rewind, Atxn10 and Cdpf1 in the respective samples.
Sample name		Relative Logarithmic expression
	Wnt7b	Lnc-Rewind	Atxn10	Cdpf1
accessory axillary lymph node, adult : CNhs10475 ctss	0	0	33.921	0
adrenal gland, adult : CNhs10508 ctss	0	0	80.901	3.563
adrenal gland, embryo E14 : CNhs11038 ctss	0	0	115.541	2.602
adrenal gland, embryo E16 : CNhs11004 ctss	0	0	101.083	0.913
adrenal gland, embryo E17 : CNhs11043 ctss	0	0	113.693	3.92
adrenal gland, embryo E18 : CNhs11026 ctss	0	0	107.767	1.658
adrenal gland, neonate N00 : CNhs11191 ctss	0	0	107.358	1.764
adrenal gland, neonate N25 : CNhs11223 ctss	0	0.377	93.622	7.666
amnion, adult pregnant day17.5 : CNhs10488 ctss	0	0	636.28	5.191
aorta, adult : CNhs10498 ctss	2.966	0.434	55.526	1.88
Aortic Smooth Muscle cells - differentiated, biol rep1 : CNhs11055 ctss	0	8.057	229.132	1.511
Aortic Smooth Muscle cells - differentiated, biol rep2 : CNhs11056 ctss	0	7.401	210.459	3.345
Aortic Smooth Muscle cells, donor1 : CNhs11297 ctss	0	6.057	208.876	1.835
Astrocytes - cerebellar, donor1 : CNhs13077 ctss	0	0	75.892	4.694
Astrocytes - cerebellar, donor2 : CNhs12076 ctss	0	5.669	170.496	5.233
Astrocytes - hippocampus, donor1 : CNhs12129 ctss	11.991	0.659	226.277	2.856
Astrocytes - hippocampus, donor2 : CNhs12077 ctss	5.492	0	219.511	4.666
Astrocytes - hippocampus, donor3 : CNhs12106 ctss	2.528	0	56.236	0
Astrocytes, donor1 : CNhs11915 ctss	0	0.37	161.415	6.289
Astrocytes, donor2 : CNhs12078 ctss	1.726	0.42	187.162	10.219
Astrocytes, donor3 : CNhs12107 ctss	0.42	0	166.753	0
Atoh+ Inner ear hair cells - organ of corti, pool1 : CNhs12533 ctss	0	0	135.646	1.441
bone (os femoris), adult : CNhs10483 ctss	4.644	0	41.577	0
bone (os femoris), neonate N02 : CNhs11227 ctss	0	1.294	85.898	2.265
bone (os femoris), neonate N16 : CNhs11225 ctss	0	0	42.843	2.429
bone (os femoris), neonate N20 : CNhs11195 ctss	0	1.455	26.183	0
Cardiac Myocytes, donor1 : CNhs12355 ctss	0	0	146.123	1.544
Cardiac Myocytes, donor2 : CNhs12356 ctss	0	2.865	140.974	0.86
Cardiac Myocytes, donor3 : CNhs12353 ctss	0	0	114.479	1.547
CD19+ B Cells, donor1 : CNhs13531 ctss	0	0	32.718	0.839
CD326+ enterocyte isolated from mice, treated with RANKL, day03, pool1 : CNhs13242 ctss	0	0	3.839	2.443
CD326+ enterocyte isolated from mice, treated with RANKL, day03, pool2 : CNhs13233 ctss	0	0	5.005	0
CD326+ enterocyte, pool1 : CNhs13542 ctss	0	0	0	1.21
CD326+ enterocyte, pool2 : CNhs13197 ctss	0	0	0	0
CD326++ enterocyte isolated from mice, treated with RANKL, day03, pool1 : CNhs13236 ctss	0	0	16.452	0.504
CD326++ enterocyte isolated from mice, treated with RANKL, day03, pool2 : CNhs13210 ctss	0	0	19.39	1.402
CD4+ T Cells, donor1 : CNhs13509 ctss	0	0	58.754	0
CD4+CD25-CD44- naive conventional T cells, antiCD3 CD28 stimulation, 06hr, pool1 (C57BL 6J) : CNhs13218 ctss	0	0	99.991	2.568
CD4+CD25-CD44- naive conventional T cells, antiCD3 CD28 stimulation, 06hr, pool2 (Balb cAJcl) : CNhs13225 ctss	0	0	115.749	1.835
CD4+CD25-CD44- naive conventional T cells, PMA and ionomycin stimulation, 02hr, pool1 (C57BL 6J) : CNhs13219 ctss	0	0	36.605	1.126
CD4+CD25-CD44- naive conventional T cells, PMA and ionomycin stimulation, 02hr, pool2 (Balb cAJcl) : CNhs13226 ctss	0	0	35.11	0
CD4+CD25-CD44- naive conventional T cells, pool1 (C57BL 6J) : CNhs13217 ctss	0	0	65.399	2.739
CD4+CD25-CD44- naive conventional T cells, pool2 (Balb cAJcl) : CNhs13220 ctss	0	0	74.22	4.284
CD4+CD25+ regulatory T cells, antiCD3 CD28 stimulation, 06hr, pool1 (BalbcA) : CNhs14158 ctss	0	0	82.188	0
CD4+CD25+ regulatory T cells, antiCD3 CD28 stimulation, 06hr, pool1 (C57BL 6J) : CNhs14159 ctss	0	0	68.254	0
CD4+CD25+ regulatory T cells, PMA and ionomycin stimulation, 02hr, pool1 (BalbcA) : CNhs14160 ctss	0	0	29.161	0
CD4+CD25+ regulatory T cells, PMA and ionomycin stimulation, 02hr, pool1 (C57BL 6J) : CNhs14142 ctss	0	0	14.559	0
CD4+CD25+ regulatory T cells, pool1 (C57BL 6J) : CNhs13913 ctss	0	0	81.172	1.893
CD4+CD25+ regulatory T cells, pool2 (Balb cAJcl) : CNhs13221 ctss	0	0	72.567	3.099
CD41+ megakaryocyte cancer, donor1 : CNhs13079 ctss	0	0	7.662	1.332
CD41+ megakaryocyte cancer, donor2 : CNhs13213 ctss	0	0	11.541	1.62
CD41+ megakaryocyte cancer, donor3 : CNhs13506 ctss	0	0	6.296	0
CD41+ megakaryocyte control, donor1 : CNhs13212 ctss	0	0	42.114	0.473
CD41+ megakaryocyte control, donor2 : CNhs13214 ctss	0	0	40.997	1.234
CD41+ megakaryocyte control, donor3 : CNhs13201 ctss	0	0	28.434	0
CD8+ T Cells, donor1 : CNhs13511 ctss	0	0	38.315	1.344
cecum, adult : CNhs10467 ctss	0	0	0	0
cerebellar granule cells, embryo E13, biol rep1 (E13R1) : CNhs14143 ctss	0	0	0	0
cerebellar granule cells, embryo E13, biol rep2 (E13R2) : CNhs14144 ctss	0	0	0	0
cerebellar granule cells, embryo E13, biol rep3 (E13R3) : CNhs14146 ctss	0	0	0	0
cerebellar granule cells, embryo E15, biol rep1 (E15R1) : CNhs14162 ctss	0	0	103.827	0
cerebellar granule cells, embryo E15, biol rep2 (E15R2) : CNhs14163 ctss	0	0	44.194	0
cerebellar granule cells, embryo E15, biol rep3 (E15R3) : CNhs14164 ctss	0	0	182.065	0
cerebellar granule cells, embryo E18, biol rep1 (E18R1) : CNhs14165 ctss	0	0	94.32	0
cerebellar granule cells, embryo E18, biol rep2 (E18R2) : CNhs14166 ctss	0	0	80.97	0
cerebellar granule cells, embryo E18, biol rep3 (E13R3) : CNhs14167 ctss	0	0	240.457	0
cerebellum, adult : CNhs10494 ctss	0	9.369	148.44	0
cerebellum, embryo E11, biol rep1 (E11R1) : CNhs12956 ctss	1.757	0	229.449	0.981
cerebellum, embryo E11, biol rep2 (E11R2) : CNhs13002 ctss	20.852	0	179.202	0.646
cerebellum, embryo E11, biol rep3 (E11R3) : CNhs13014 ctss	9.692	0	173.742	0
cerebellum, embryo E12, biol rep1 (E12R1) : CNhs12957 ctss	6.351	0	269.613	0
cerebellum, embryo E12, biol rep2 (E12R2) : CNhs13003 ctss	10.409	0	205.605	0
cerebellum, embryo E12, biol rep3 (E12R3) : CNhs13015 ctss	5.102	0	145.777	1.268
cerebellum, embryo E13, biol rep1 (E13R1) : CNhs12958 ctss	7.968	0	280.541	0.404
cerebellum, embryo E13, biol rep2 (E13R2) : CNhs13004 ctss	7.804	0	259.383	0
cerebellum, embryo E13, biol rep3 (E13R3) : CNhs13016 ctss	2.421	0	235.413	0
cerebellum, embryo E14, biol rep1 (E14R1) : CNhs12960 ctss	3.567	0	314.575	0.773
cerebellum, embryo E14, biol rep2 (E14R2) : CNhs13005 ctss	9.385	0	246.171	0
cerebellum, embryo E14, biol rep3 (E14R3) : CNhs13017 ctss	7.532	0	208.934	0.978
cerebellum, embryo E15, biol rep1 (E15R1) : CNhs12961 ctss	5.086	0	291.553	0
cerebellum, embryo E15, biol rep2 (E15R2) : CNhs13006 ctss	11.056	0	234.928	0.727
cerebellum, embryo E15, biol rep3 (E15R3) : CNhs13018 ctss	7.266	0	206.456	0
cerebellum, embryo E16, biol rep1 (E16R1) : CNhs13000 ctss	7.018	0	207.729	0
cerebellum, embryo E16, biol rep2 (E16R2) : CNhs13007 ctss	4.69	0	199.348	0
cerebellum, embryo E16, biol rep3 (E16R3) : CNhs13019 ctss	7.523	0	223.231	0.821
cerebellum, embryo E17, biol rep1 (E17R1) : CNhs12818 ctss	9.028	1.079	225.083	1.079
cerebellum, embryo E17, biol rep2 (E17R2) : CNhs13008 ctss	12.487	0.829	192.252	0
cerebellum, embryo E17, biol rep3 (E17R3) : CNhs13020 ctss	4.765	0	186.748	0
cerebellum, embryo E18, biol rep1 (E18R1) : CNhs12962 ctss	2.606	1.191	239.896	2.144
cerebellum, embryo E18, biol rep2 (E18R2) : CNhs13009 ctss	3.573	0	212.806	0.818
cerebellum, embryo E18, biol rep3 (E18R3) : CNhs13021 ctss	5.724	0	141.175	0
cerebellum, neonate N00, biol rep1 (P0R1) : CNhs12963 ctss	4.183	1.648	264.167	0
cerebellum, neonate N00, biol rep2 (P0R2) : CNhs13010 ctss	0	1.896	198.499	0.632
cerebellum, neonate N00, biol rep3 (P0R3) : CNhs13022 ctss	5.057	1.09	170.769	0
cerebellum, neonate N03, biol rep1 (P3R1) : CNhs13001 ctss	2.18	1.006	179.236	0
cerebellum, neonate N03, biol rep2 (P3R2) : CNhs13011 ctss	6.437	3.177	197.79	0
cerebellum, neonate N03, biol rep3 (P3R3) : CNhs13024 ctss	2.78	4.109	176.683	0
cerebellum, neonate N06, biol rep1 (P6R1) : CNhs12819 ctss	3.082	6.016	217.999	0
cerebellum, neonate N06, biol rep2 (P6R2) : CNhs13012 ctss	1.289	2.239	181.601	0
cerebellum, neonate N06, biol rep3 (P6R3) : CNhs13025 ctss	0	0	104.116	0
cerebellum, neonate N09, biol rep1 (P9R1) : CNhs12820 ctss	3.288	3.851	159.443	1.541
cerebellum, neonate N09, biol rep2 (P9R2) : CNhs13013 ctss	1.155	2.331	172.234	0.699
cerebellum, neonate N09, biol rep3 (P9R3) : CNhs13026 ctss	0	2.469	189.736	0
cerebellum, neonate N30 : CNhs11135 ctss	0	8.378	187.874	3.561
Clontech Mouse Universal Reference Total RNA, pool1 : CNhs10609 ctss	0.628	1.191	124.333	5.613
colon, adult : CNhs10468 ctss	1.786	0	12.262	3.576
common myeloid progenitor CMP, biol rep1 : CNhs12550 ctss	0	0	96.451	0.359
common myeloid progenitor CMP, biol rep2 : CNhs12203 ctss	0	0	68.989	0
common myeloid progenitor CMP, biol rep3 : CNhs12551 ctss	0	0	91.363	1.271
corpora quadrigemina, adult : CNhs10501 ctss	0	0	252.247	1.348
corpus striatum, adult : CNhs10487 ctss	8.987	1.373	140.91	1.83
corpus striatum, neonate N00 : CNhs11226 ctss	8.235	2.01	228.691	2.01
cortex, adult : CNhs10473 ctss	4.649	2.781	227.015	1.217
cortex, neonate N30 : CNhs11107 ctss	5.041	2.301	235.258	1.023
diencephalon, adult : CNhs10482 ctss	3.58	0	234.593	1.87
diencephalon, neonate N30 : CNhs11201 ctss	5.402	1.298	241.091	4.543
EBF KO HPCs induced to T cell, 00hr00min, biol rep1 : CNhs11058 ctss	4.543	0	126	1.986
EBF KO HPCs induced to T cell, 00hr00min, biol rep2 : CNhs12980 ctss	0	0	121.197	1.828
EBF KO HPCs induced to T cell, 00hr00min, biol rep3 : CNhs13687 ctss	0	0	140.257	0.797
EBF KO HPCs induced to T cell, 00hr30min, biol rep1 : CNhs12231 ctss	0	0	107.407	1.506
EBF KO HPCs induced to T cell, 00hr30min, biol rep2 : CNhs12981 ctss	0	0	109.618	1.836
EBF KO HPCs induced to T cell, 00hr30min, biol rep3 : CNhs13688 ctss	0	0	154.372	0.859
EBF KO HPCs induced to T cell, 01hr, biol rep1 : CNhs12232 ctss	0	0	103.258	0.741
EBF KO HPCs induced to T cell, 01hr, biol rep2 : CNhs12982 ctss	0	0	105.017	1.085
EBF KO HPCs induced to T cell, 01hr, biol rep3 : CNhs13689 ctss	0	0	147.906	0.873
EBF KO HPCs induced to T cell, 02hr, biol rep1 : CNhs12233 ctss	0	0	103.967	0
EBF KO HPCs induced to T cell, 02hr, biol rep2 : CNhs12984 ctss	0	0	46.95	0
EBF KO HPCs induced to T cell, 02hr, biol rep3 : CNhs13690 ctss	0	0.894	141.505	0.511
EBF KO HPCs induced to T cell, 04hr, biol rep1 : CNhs12234 ctss	0	0	95.739	3.122
EBF KO HPCs induced to T cell, 04hr, biol rep2 : CNhs12985 ctss	0	0	104.344	2.455
EBF KO HPCs induced to T cell, 04hr, biol rep3 : CNhs13691 ctss	0	0.553	140.616	0.83
EBF KO HPCs induced to T cell, 06hr, biol rep1 : CNhs12235 ctss	0	0	102.165	3.438
EBF KO HPCs induced to T cell, 06hr, biol rep2 : CNhs12986 ctss	0	0	122.344	0.648
EBF KO HPCs induced to T cell, 06hr, biol rep3 : CNhs13587 ctss	0	0	87.688	0
EBF KO HPCs induced to T cell, 08hr, biol rep1 : CNhs12236 ctss	0	0	95.441	1.515
EBF KO HPCs induced to T cell, 08hr, biol rep2 : CNhs12987 ctss	0	1.228	114.206	0
EBF KO HPCs induced to T cell, 08hr, biol rep3 : CNhs13588 ctss	0	0.699	116.682	0
EBF KO HPCs induced to T cell, 10hr, biol rep1 : CNhs12237 ctss	0	0	113.709	1.147
EBF KO HPCs induced to T cell, 10hr, biol rep2 : CNhs12988 ctss	0	0	116.03	0.859
EBF KO HPCs induced to T cell, 10hr, biol rep3 : CNhs13589 ctss	0	0	85.992	0
EBF KO HPCs induced to T cell, 12hr, biol rep1 : CNhs12238 ctss	0	0	111.11	2.834
EBF KO HPCs induced to T cell, 12hr, biol rep2 : CNhs12989 ctss	0	0.596	105.144	1.988
EBF KO HPCs induced to T cell, 12hr, biol rep3 : CNhs13590 ctss	0	0	36.205	0
EBF KO HPCs induced to T cell, 24hr, biol rep1 : CNhs12239 ctss	0	1.052	106.624	0
EBF KO HPCs induced to T cell, 24hr, biol rep2 : CNhs12990 ctss	0	0	98.338	1.549
EBF KO HPCs induced to T cell, 24hr, biol rep3 : CNhs13591 ctss	0	0	15.697	0
EBF KO HPCs induced to T cell, day02, biol rep1 : CNhs12240 ctss	0	0.568	100.99	0
EBF KO HPCs induced to T cell, day02, biol rep2 : CNhs12991 ctss	0	0	80.616	1.536
EBF KO HPCs induced to T cell, day02, biol rep3 : CNhs13592 ctss	0	0	93.42	0
EBF KO HPCs induced to T cell, day03, biol rep1 : CNhs11059 ctss	0	0.467	110.889	0.748
EBF KO HPCs induced to T cell, day03, biol rep2 : CNhs13684 ctss	0	0	114.419	0
EBF KO HPCs induced to T cell, day03, biol rep3 : CNhs13593 ctss	0	0	60.073	0
EBF KO HPCs induced to T cell, day04, biol rep1 : CNhs12241 ctss	0	0	86.761	0
EBF KO HPCs induced to T cell, day04, biol rep2 : CNhs13686 ctss	0	0	121.112	0.547
EBF KO HPCs induced to T cell, day04, biol rep3 : CNhs13595 ctss	0	0	89.214	0
EBF KO HPCs induced to T cell, day05, biol rep1 : CNhs12242 ctss	0	1.69	93.815	0
EBF KO HPCs induced to T cell, day05, biol rep2 : CNhs12992 ctss	0	0	102.086	0
EBF KO HPCs induced to T cell, day05, biol rep3 : CNhs13596 ctss	0	1.046	89.577	1.046
EBF KO HPCs induced to T cell, day06, biol rep1 : CNhs11060 ctss	0	0.42	96.487	0
EBF KO HPCs induced to T cell, day06, biol rep2 : CNhs12993 ctss	0	0	96.91	0
EBF KO HPCs induced to T cell, day06, biol rep3 : CNhs13597 ctss	0	0	26.269	0
Embryonic fibroblasts, donor1 : CNhs12130 ctss	0	0	103.601	1.723
epididymis and seminiferous tubule, neonate N00 : CNhs11218 ctss	0	0	125.059	1.833
epididymis and seminiferous tubule, neonate N30 : CNhs11199 ctss	1.018	3.359	69.917	1.368
epididymis, adult : CNhs10490 ctss	0	1.516	49.281	0
ES-46C derived epistem cells, biol rep1 : CNhs14123 ctss	0	0	166.536	0.985
ES-46C derived epistem cells, biol rep2 : CNhs14124 ctss	0	0	159.313	0
ES-46C derived epistem cells, biol rep3 : CNhs14125 ctss	0	0	137.282	1.91
ES-46C derived epistem cells, neuronal differentiation, day05, biol rep1 : CNhs14126 ctss	0	0	202.867	0.318
ES-46C derived epistem cells, neuronal differentiation, day14, biol rep1 : CNhs14127 ctss	0.531	0	286.674	1.42
ES-46C embryonic stem cells, neuronal differentiation, day00, biol rep1 : CNhs14104 ctss	7.809	0	227.576	1.273
ES-46C embryonic stem cells, neuronal differentiation, day00, biol rep2 : CNhs14109 ctss	0.891	0	182.549	2.057
ES-46C embryonic stem cells, neuronal differentiation, day01, biol rep1 : CNhs14105 ctss	0.386	0	154.959	0.645
ES-46C embryonic stem cells, neuronal differentiation, day01, biol rep2 : CNhs14110 ctss	0	0	147.503	2.362
ES-46C embryonic stem cells, neuronal differentiation, day02, biol rep1 : CNhs14106 ctss	0	0	160.127	2.338
ES-46C embryonic stem cells, neuronal differentiation, day02, biol rep2 : CNhs14111 ctss	0	0	139.218	1.287
ES-46C embryonic stem cells, neuronal differentiation, day03, biol rep1 : CNhs14107 ctss	0	0	162.297	1.045
ES-46C embryonic stem cells, neuronal differentiation, day03, biol rep2 : CNhs14112 ctss	0	0	179.71	0.554
ES-46C embryonic stem cells, neuronal differentiation, day04, biol rep1 : CNhs14108 ctss	0.554	0	197.965	0
ES-46C embryonic stem cells, neuronal differentiation, day04, biol rep2 : CNhs14113 ctss	0	0	193.865	2.447
ES-Ert2 embryonic stem cells, tamoxifen treated, 48hr, biol rep1 : CNhs14101 ctss	1.762	0	289.818	3.623
ES-Ert2 embryonic stem cells, tamoxifen treated, 48hr, biol rep2 : CNhs14102 ctss	5.217	0	284.374	3.328
ES-Ert2 embryonic stem cells, tamoxifen treated, 48hr, biol rep3 : CNhs14103 ctss	2.589	0	215.36	2.536
ES-Ert2 embryonic stem cells, untreated control, 48hr, biol rep1 : CNhs14098 ctss	2.898	0	294.861	1.624
ES-Ert2 embryonic stem cells, untreated control, 48hr, biol rep2 : CNhs14099 ctss	1.972	0	230.947	1.778
ES-Ert2 embryonic stem cells, untreated control, 48hr, biol rep3 : CNhs14100 ctss	0	0	161.95	0.974
ES-OS25 embryonic stem cells, aminitin treatment for 7hr, biol rep1 : CNhs14094 ctss	0	0	287.207	0.929
ES-OS25 embryonic stem cells, aminitin treatment for 7hr, biol rep2 : CNhs14095 ctss	0	0	278.489	0
ES-OS25 embryonic stem cells, aminitin treatment for 7hr, biol rep3 : CNhs14097 ctss	0	0	362.261	0.549
ES-OS25 embryonic stem cells, DMSO control, biol rep1 : CNhs14085 ctss	0	0	158.628	1.217
ES-OS25 embryonic stem cells, DMSO control, biol rep2 : CNhs14086 ctss	0	0	250.853	0.753
ES-OS25 embryonic stem cells, DMSO control, biol rep3 : CNhs14087 ctss	0	0	238.238	0.666
ES-OS25 embryonic stem cells, flavopiridol treatment, 01hr, biol rep1 : CNhs14088 ctss	0	0	278.817	0
ES-OS25 embryonic stem cells, flavopiridol treatment, 01hr, biol rep2 : CNhs14089 ctss	0	0	285.625	1.083
ES-OS25 embryonic stem cells, flavopiridol treatment, 01hr, biol rep3 : CNhs14090 ctss	0	0	317.598	0
ES-OS25 embryonic stem cells, KD for exosomal component EXOSC3, biol rep1 : CNhs14118 ctss	0	0	228.629	1.396
ES-OS25 embryonic stem cells, KD for exosomal component EXOSC3, biol rep2 : CNhs14119 ctss	0.381	0	227.232	0.605
ES-OS25 embryonic stem cells, KD for exosomal component EXOSC5, biol rep1 : CNhs14121 ctss	0.908	0	203.265	0.429
ES-OS25 embryonic stem cells, KD for exosomal component EXOSC5, biol rep2 : CNhs14122 ctss	1	0	195.262	0.417
ES-OS25 embryonic stem cells, scrambled siRNA control, biol rep1 : CNhs14116 ctss	2.5	0	219.185	2.613
ES-OS25 embryonic stem cells, scrambled siRNA control, biol rep2 : CNhs14117 ctss	0	0	224.023	2.214
ES-OS25 embryonic stem cells, untreated control, biol rep1 : CNhs14091 ctss	0.385	0	208.425	0
ES-OS25 embryonic stem cells, untreated control, biol rep2 : CNhs14092 ctss	0	0	189.248	0
ES-OS25 embryonic stem cells, untreated control, biol rep3 : CNhs14093 ctss	0	0	183.933	0.983
ES-OS25 embryonic stem cells, untreated siRNA control, biol rep1 : CNhs14114 ctss	0	0	198.382	1.077
ES-OS25 embryonic stem cells, untreated siRNA control, biol rep2 : CNhs14115 ctss	0	0	208.523	0.468
eyeball, adult : CNhs10484 ctss	0	0	73.234	2.946
eyeball, embryo E12 : CNhs11016 ctss	1.263	0	159.918	2.082
eyeball, embryo E14 : CNhs10521 ctss	1.692	0	162.541	0.69
eyeball, embryo E15 : CNhs10593 ctss	1.15	0	135.947	0
eyeball, embryo E17 : CNhs11023 ctss	4.862	0	147.992	1.507
eyeball, neonate N00 : CNhs11207 ctss	4.672	0	148.115	1.157
eyeball, neonate N01 : CNhs11140 ctss	9.729	0	145.281	0.384
eyeball, neonate N02 : CNhs11205 ctss	4.612	0	157.794	0.656
eyeball, neonate N16 : CNhs11188 ctss	6.372	0	127.023	0.776
Follicle Associated Epithelium, pool2 : CNhs13211 ctss	1.294	0	51.358	2.24
Follicle Associated Epithelium, pool3 : CNhs13200 ctss	0	0	36.705	0.918
forelimb, embryo E11 : CNhs10596 ctss	0	0	145.293	0.647
forelimb, embryo E12 : CNhs10600 ctss	1.94	0	146.368	0
forelimb, embryo E13 : CNhs10589 ctss	2.837	0	133.899	0.88
forelimb, embryo E14 : CNhs10577 ctss	3.519	0	147.08	0.877
forelimb, embryo E15 : CNhs11007 ctss	3.507	0	125.121	0
forelimb, embryo E17 : CNhs10598 ctss	2.78	0	85.322	1.045
forelimb, embryo E18 : CNhs11008 ctss	4.527	0.617	98.981	1.235
gonad, embryo E13 : CNhs11044 ctss	5.145	0	107.678	2.189
GP2+ M cell, pool1 : CNhs13228 ctss	0.597	0	8.039	0
GP2+ M cell, pool2 : CNhs13231 ctss	0	0	4.308	0
GP2+ M cell, pool3 : CNhs13240 ctss	0	0	8.619	0
Granule cells, donor1 : CNhs12131 ctss	0	0	202.114	0
Granule cells, donor2 : CNhs12357 ctss	10.925	0	228.524	0
Granule cells, donor3 : CNhs12108 ctss	3.703	0	216.137	0
granulocyte macrophage progenitor GMP, biol rep1 : CNhs12206 ctss	3.169	0	67.412	0
granulocyte macrophage progenitor GMP, biol rep2 : CNhs12202 ctss	0	0	77.719	1.287
granulocyte macrophage progenitor GMP, biol rep3 : CNhs11928 ctss	0	0	74.735	1.137
heart, embryo E11 : CNhs10586 ctss	0	0	146.852	0.621
heart, embryo E12 : CNhs11015 ctss	0	0	136.963	2.345
heart, embryo E13 : CNhs11013 ctss	0	0	119.921	4.321
heart, embryo E14 : CNhs10597 ctss	0	0	110.086	0
heart, embryo E15 : CNhs11017 ctss	0	0	110.581	5.509
heart, embryo E16 : CNhs11021 ctss	0	0	115.083	6.942
heart, embryo E17 : CNhs11025 ctss	0	0	86.503	6.743
heart, embryo E18 : CNhs11030 ctss	0	0	105.968	4.292
heart, neonate N00 : CNhs11213 ctss	0	0	103.337	5.138
heart, neonate N03 : CNhs11221 ctss	0	0	103.673	3.127
heart, neonate N10 : CNhs11118 ctss	0	0	92.426	2.955
heart, neonate N16 : CNhs11209 ctss	0	0	86.014	4.621
heart, neonate N20 : CNhs11127 ctss	0	0	83.334	4.386
heart, neonate N25 : CNhs11196 ctss	0	0	77.282	1.317
heart, neonate N30 : CNhs11202 ctss	0	0.403	81.732	6.576
hematopoietic stem cell, aorta-gonad-mesonephros (AGM) region derived, embryo E10.5 : CNhs14374 ctss	0	0	45.405	0
hematopoietic stem cell, bone marrow derived, adult 2years : CNhs14157 ctss	0	0	45.459	0
hematopoietic stem cell, bone marrow derived, embryo E19.5 : CNhs14375 ctss	0	0	0	0
hematopoietic stem cell, bone marrow derived, newborn 2-3months : CNhs14156 ctss	0	0	62.116	0
hematopoietic stem cell, fetal liver derived, embryo E12.5 : CNhs14153 ctss	0	0	105.732	0
hematopoietic stem cell, fetal liver derived, embryo E14.5 : CNhs14154 ctss	0	0	86.258	0
hematopoietic stem cell, fetal liver derived, embryo E19.5 : CNhs14155 ctss	0	0	32.496	0
hematopoietic stem cell, placenta derived, embryo E10.5 : CNhs14150 ctss	0	0	92.888	0
hematopoietic stem cell, placenta derived, embryo E11.5 : CNhs14152 ctss	0	0	99.402	0
hematopoietic stem cell,aorta-gonad-mesonephros (AGM) region derived, embryo E11.5 : CNhs14151 ctss	0	0	43.756	0
hepatic Sinusoidal Endothelial Cells, donor1 : CNhs13209 ctss	0	0	77.394	0.87
hepatic Stellate Cells (lipocyte), donor1 : CNhs13196 ctss	0	0	42.161	0
hepatic stellate cells, partial hepatectomy, 02hr, biol rep1 : CNhs14393 ctss	0	0	38.123	0
hepatic stellate cells, partial hepatectomy, 30hr, biol rep1 : CNhs14511 ctss	0	0	27.503	0
hepatic stellate cells, partial hepatectomy, 30hr, biol rep2 : CNhs14512 ctss	0	0	96.443	0
hepatic stellate cells, partial hepatectomy, 30hr, biol rep3 : CNhs14513 ctss	0	0	149.732	0
hepatic stellate cells, partial hepatectomy, 48hr, biol rep1 : CNhs14514 ctss	0	0	160.044	0
hepatic stellate cells, partial hepatectomy, 48hr, biol rep2 : CNhs14515 ctss	0	0	69.191	0
hepatic stellate cells, partial hepatectomy, 48hr, biol rep3 : CNhs14516 ctss	0	0	92.315	0
hepatic stellate cells, partial hepatectomy, week01, biol rep1 : CNhs14517 ctss	0	0	105.103	2.236
hepatic stellate cells, sham operation, biol rep1 : CNhs14390 ctss	0	0	52.926	0
hepatic stellate cells, sham operation, biol rep2 : CNhs14391 ctss	0	0	42.251	0
hepatic stellate cells, sham operation, biol rep3 : CNhs14392 ctss	0	0	47.042	0
hepatocyte, donor1 : CNhs13078 ctss	0	0	11.56	0
hepatocyte, donor3 : CNhs12615 ctss	0	0	44.256	0
hepatocyte, donor6 : CNhs13090 ctss	0	0	79.273	0
hepatocyte, donor8 : CNhs13091 ctss	0	0	105.286	1.344
hepatocytes, partial hepatectomy, 02hr, biol rep1 : CNhs14450 ctss	0	0	78.13	0
hepatocytes, partial hepatectomy, 02hr, biol rep2 : CNhs14451 ctss	0	0	102.196	0
hepatocytes, partial hepatectomy, 02hr, biol rep3 : CNhs14452 ctss	0	0	81.205	0
hepatocytes, partial hepatectomy, 30hr, biol rep1 : CNhs14453 ctss	0	0	105.022	0
hepatocytes, partial hepatectomy, 30hr, biol rep2 : CNhs14454 ctss	0	0	161.318	0
hepatocytes, partial hepatectomy, 30hr, biol rep3 : CNhs14455 ctss	0	0	171.536	0
hepatocytes, partial hepatectomy, 48hr, biol rep1 : CNhs14456 ctss	0	0	144.998	0.589
hepatocytes, partial hepatectomy, 48hr, biol rep2 : CNhs14458 ctss	0	0	140.382	2.275
hepatocytes, partial hepatectomy, 48hr, biol rep3 : CNhs14459 ctss	0	0	129.039	1.024
hepatocytes, partial hepatectomy, week01, biol rep1 : CNhs14460 ctss	0	0	84.227	0
hepatocytes, partial hepatectomy, week01, biol rep2 : CNhs14461 ctss	0	0	0	0
hepatocytes, partial hepatectomy, week01, biol rep3 : CNhs14462 ctss	0	0	109.481	0
hepatocytes, sham operation, biol rep1 : CNhs14447 ctss	0	0	61.033	0
hepatocytes, sham operation, biol rep2 : CNhs14448 ctss	0	0	69.22	0
hepatocytes, sham operation, biol rep3 : CNhs14449 ctss	0	0	65.779	0
hippocampus, adult : CNhs10478 ctss	0	2.523	232.791	3.575
hippocampus, neonate N00 : CNhs11228 ctss	5.888	2.161	271.462	1.235
Ileum epithelium, pool1 : CNhs13199 ctss	11.011	0	5.511	0.76
Ileum epithelium, pool2 : CNhs13232 ctss	0	0	3.276	1.764
Ileum epithelium, treated with RANKL, day03, pool3 : CNhs13234 ctss	0	0	20.843	2.439
Inner ear stem cells, 1st generation stem cells, pool1 : CNhs11929 ctss	0	0.728	143.598	1.893
Inner ear stem cells, 4th generation stem cells, pool1 : CNhs12544 ctss	15.292	0	148.329	2.324
Inner ear stem cells, differentiation, day03, pool1 : CNhs12189 ctss	1.549	0	85.55	0
Inner ear stem cells, differentiation, day10, pool1 : CNhs12190 ctss	6.067	0	93.881	1.322
intestinal mucosa, adult : CNhs10506 ctss	3.636	0	3.965	0
intestine, adult : CNhs10496 ctss	0	0	1.322	0.793
intestine, embryo E12 : CNhs11019 ctss	0	0	118.588	0.64
intestine, embryo E13 : CNhs11010 ctss	0	0	112.17	1.858
intestine, embryo E15 : CNhs10602 ctss	0	0	95.104	2.706
intestine, embryo E16 : CNhs10585 ctss	0	0	78.455	4.84
intestine, embryo E17 : CNhs10582 ctss	0	0	75.386	2.891
intestine, embryo E18 : CNhs10526 ctss	0	0	79.895	7.799
intestine, neonate N00 : CNhs11126 ctss	0	0	11.389	4.745
intestine, neonate N01 : CNhs11192 ctss	0	0	72.138	6.423
intestine, neonate N06 : CNhs11102 ctss	0	0	58.561	7.54
intestine, neonate N07 : CNhs11095 ctss	0	0	64.263	5.173
intestine, neonate N10 : CNhs11098 ctss	0	0	60.244	4.679
intestine, neonate N20 : CNhs11187 ctss	0	0	13.482	0
intestine, neonate N25 : CNhs11121 ctss	0	0	15.13	6.7
intestine, neonate N30 : CNhs11131 ctss	0	0	11.351	4.779
J2E erythroblastic leukemia response to erythropoietin, 00hr00min, biol rep1 : CNhs12449 ctss	0	0	17.781	0
J2E erythroblastic leukemia response to erythropoietin, 00hr00min, biol rep2 : CNhs12668 ctss	0	0	14.762	0
J2E erythroblastic leukemia response to erythropoietin, 00hr00min, biol rep3, tech rep1 : CNhs12770 ctss	0	0	0	0
J2E erythroblastic leukemia response to erythropoietin, 00hr00min, biol rep3, tech rep2 : CNhs14547 ctss	0	0	28.352	3.195
J2E erythroblastic leukemia response to erythropoietin, 00hr15min, biol rep1 : CNhs12644 ctss	0	0	10.172	1.327
J2E erythroblastic leukemia response to erythropoietin, 00hr15min, biol rep2 : CNhs12669 ctss	0	0	18.591	0
J2E erythroblastic leukemia response to erythropoietin, 00hr15min, biol rep3 : CNhs12771 ctss	0	0	5.347	0
J2E erythroblastic leukemia response to erythropoietin, 00hr30min, biol rep1 : CNhs12645 ctss	0	0	14.704	0
J2E erythroblastic leukemia response to erythropoietin, 00hr30min, biol rep2, tech rep1 : CNhs12670 ctss	0	0	0	0
J2E erythroblastic leukemia response to erythropoietin, 00hr30min, biol rep2, tech rep2 : CNhs14544 ctss	0	0	0	0
J2E erythroblastic leukemia response to erythropoietin, 00hr30min, biol rep3 : CNhs12772 ctss	0	0	10.056	0
J2E erythroblastic leukemia response to erythropoietin, 00hr45min, biol rep1 : CNhs12646 ctss	0	0	13.278	0
J2E erythroblastic leukemia response to erythropoietin, 00hr45min, biol rep2 : CNhs12671 ctss	0	0	13.944	0
J2E erythroblastic leukemia response to erythropoietin, 00hr45min, biol rep3 : CNhs12773 ctss	0	0	12.426	0
J2E erythroblastic leukemia response to erythropoietin, 01hr00min, biol rep1 : CNhs12647 ctss	0	0	6.733	0
J2E erythroblastic leukemia response to erythropoietin, 01hr00min, biol rep2 : CNhs12672 ctss	0	0	9.257	0
J2E erythroblastic leukemia response to erythropoietin, 01hr00min, biol rep3 : CNhs12774 ctss	0	0	14.917	1.721
J2E erythroblastic leukemia response to erythropoietin, 01hr20min, biol rep1 : CNhs12648 ctss	0	0	9.321	0
J2E erythroblastic leukemia response to erythropoietin, 01hr20min, biol rep2 : CNhs12673 ctss	0	0	12.382	0
J2E erythroblastic leukemia response to erythropoietin, 01hr20min, biol rep3 : CNhs12775 ctss	0	0	11.46	1.698
J2E erythroblastic leukemia response to erythropoietin, 01hr40min, biol rep1 : CNhs12649 ctss	0	0	10.244	1.537
J2E erythroblastic leukemia response to erythropoietin, 01hr40min, biol rep2 : CNhs12674 ctss	0	0	17.906	0
J2E erythroblastic leukemia response to erythropoietin, 01hr40min, biol rep3 : CNhs12776 ctss	0	0	16.113	1.131
J2E erythroblastic leukemia response to erythropoietin, 02hr00min, biol rep1 : CNhs12650 ctss	0	0	14.742	0
J2E erythroblastic leukemia response to erythropoietin, 02hr00min, biol rep2 : CNhs12675 ctss	0	0	12.131	0
J2E erythroblastic leukemia response to erythropoietin, 02hr00min, biol rep3, tech rep1 : CNhs12777 ctss	0	0	8.752	0
J2E erythroblastic leukemia response to erythropoietin, 02hr00min, biol rep3, tech rep2 : CNhs14548 ctss	0	0	17.811	0
J2E erythroblastic leukemia response to erythropoietin, 02hr30min, biol rep1 : CNhs12651 ctss	0	0	14.579	1.411
J2E erythroblastic leukemia response to erythropoietin, 02hr30min, biol rep2 : CNhs12676 ctss	0	0	17.68	0
J2E erythroblastic leukemia response to erythropoietin, 02hr30min, biol rep3 : CNhs12778 ctss	0	0	16.811	2.242
J2E erythroblastic leukemia response to erythropoietin, 03hr00min, biol rep1 : CNhs12450 ctss	0	0	10.142	0
J2E erythroblastic leukemia response to erythropoietin, 03hr00min, biol rep2 : CNhs12677 ctss	0	0	13.783	1.654
J2E erythroblastic leukemia response to erythropoietin, 03hr00min, biol rep3 : CNhs12779 ctss	0	0	3.571	0
J2E erythroblastic leukemia response to erythropoietin, 03hr30min, biol rep1 : CNhs12451 ctss	0	0	9.016	3.182
J2E erythroblastic leukemia response to erythropoietin, 03hr30min, biol rep2 : CNhs12678 ctss	0	0	14.312	2.526
J2E erythroblastic leukemia response to erythropoietin, 03hr30min, biol rep3 : CNhs12780 ctss	0	0	10.301	0
J2E erythroblastic leukemia response to erythropoietin, 04hr00min, biol rep1 : CNhs12452 ctss	0	0	11.059	0
J2E erythroblastic leukemia response to erythropoietin, 04hr00min, biol rep2 : CNhs12679 ctss	0	0	6.278	0
J2E erythroblastic leukemia response to erythropoietin, 04hr00min, biol rep3 : CNhs12781 ctss	0	0	13.689	1.208
J2E erythroblastic leukemia response to erythropoietin, 06hr00min, biol rep1 : CNhs12453 ctss	0	0	15.062	0
J2E erythroblastic leukemia response to erythropoietin, 06hr00min, biol rep2 : CNhs12680 ctss	0	0	7.278	0
J2E erythroblastic leukemia response to erythropoietin, 06hr00min, biol rep3 : CNhs12782 ctss	0	0	10.628	1.386
J2E erythroblastic leukemia response to erythropoietin, 12hr00min, biol rep1 : CNhs12454 ctss	0	0	4.393	0
J2E erythroblastic leukemia response to erythropoietin, 12hr00min, biol rep2, tech rep1 : CNhs12681 ctss	0	0	0	0
J2E erythroblastic leukemia response to erythropoietin, 12hr00min, biol rep2, tech rep2 : CNhs14546 ctss	0	0	22.132	2.075
J2E erythroblastic leukemia response to erythropoietin, 12hr00min, biol rep3 : CNhs12783 ctss	0	0	6.638	0
J2E erythroblastic leukemia response to erythropoietin, 24hr00min, biol rep1 : CNhs12455 ctss	0	0	7.72	2.106
J2E erythroblastic leukemia response to erythropoietin, 24hr00min, biol rep2 : CNhs12682 ctss	0	0	0	0
J2E erythroblastic leukemia response to erythropoietin, 24hr00min, biol rep3 : CNhs12784 ctss	0	0	0	0
J2E erythroblastic leukemia response to erythropoietin, 48hr00min, biol rep1 : CNhs12456 ctss	0	0	11.139	0
J2E erythroblastic leukemia response to erythropoietin, 48hr00min, biol rep2 : CNhs12683 ctss	0	0	7.214	0
J2E erythroblastic leukemia response to erythropoietin, 48hr00min, biol rep3 : CNhs12785 ctss	0	0	8.159	0
kidney, embryo E14 : CNhs10606 ctss	0	0	161.787	1.707
kidney, embryo E15 : CNhs10997 ctss	0.569	0	126.13	0.343
kidney, embryo E16 : CNhs10584 ctss	0.343	0	82.277	0
kidney, embryo E17 : CNhs11028 ctss	0	0	107.935	1.018
kidney, embryo E18 : CNhs11001 ctss	1.833	0	117.147	1.164
kidney, neonate N00 : CNhs11214 ctss	1.94	0	113.48	2.314
kidney, neonate N10 : CNhs11206 ctss	4.629	0	108.957	4.553
kidney, neonate N20 : CNhs11113 ctss	3.352	0	63.915	4.133
kidney, neonate N25 : CNhs11122 ctss	2.214	0	81.011	4.553
kidney, neonate N30 : CNhs11203 ctss	2.198	0	85.514	5.553
Lgr5+ intestinal stem cells, pool1 : CNhs12555 ctss	1.357	0	17.62	4.333
Lgr5+ intestinal stem cells, pool2 : CNhs12556 ctss	0	0	17.953	6.982
Lgr5+ intestinal stem cells, pool3 : CNhs12557 ctss	0	0	15.517	4.288
liver sinusoidal endothelial cells, partial hepatectomy, 02hr, biol rep1 : CNhs14504 ctss	0	0	52.9	0
liver sinusoidal endothelial cells, partial hepatectomy, 02hr, biol rep2 : CNhs14399 ctss	0	0	78.58	0
liver sinusoidal endothelial cells, partial hepatectomy, 02hr, biol rep3 : CNhs14400 ctss	0	0	38.859	0
liver sinusoidal endothelial cells, partial hepatectomy, 30hr, biol rep1 : CNhs14402 ctss	0	0	84.384	0
liver sinusoidal endothelial cells, partial hepatectomy, 30hr, biol rep2 : CNhs14403 ctss	0	0	117.849	0
liver sinusoidal endothelial cells, partial hepatectomy, 30hr, biol rep3 : CNhs14506 ctss	0	0	52.182	0
liver sinusoidal endothelial cells, partial hepatectomy, 48hr, biol rep1 : CNhs14404 ctss	0	0	90.012	0
liver sinusoidal endothelial cells, partial hepatectomy, 48hr, biol rep2 : CNhs14405 ctss	4.246	0	12.411	0
liver sinusoidal endothelial cells, partial hepatectomy, 48hr, biol rep3 : CNhs14507 ctss	0	0	96.223	1.827
liver sinusoidal endothelial cells, partial hepatectomy, week01, biol rep1 : CNhs14508 ctss	0	0	58.99	0
liver sinusoidal endothelial cells, partial hepatectomy, week01, biol rep2 : CNhs14509 ctss	0	2.178	74.037	1.089
liver sinusoidal endothelial cells, partial hepatectomy, week01, biol rep3 : CNhs14510 ctss	0	0	66.035	0
liver sinusoidal endothelial cells, sham operation, biol rep1 : CNhs14503 ctss	0	0	40.135	0
liver sinusoidal endothelial cells, sham operation, biol rep2 : CNhs14502 ctss	0	0	21.625	0
liver sinusoidal endothelial cells, sham operation, biol rep3 : CNhs14398 ctss	0	0	50.578	0
liver, adult pregnant day01 : CNhs10466 ctss	0	0	50.1	0.889
liver, embryo E12 : CNhs10601 ctss	0	0	57.895	1.335
liver, embryo E13 : CNhs10524 ctss	0	0	59.361	2.752
liver, embryo E14 : CNhs10594 ctss	0	0	52.168	1.799
liver, embryo E15 : CNhs10520 ctss	0	0	54.772	1.623
liver, embryo E16 : CNhs10523 ctss	0	0	80.312	2.653
liver, embryo E17 : CNhs10510 ctss	0	0	96.503	1.528
liver, embryo E18 : CNhs10579 ctss	0	0	81.13	0.863
liver, neonate N00 : CNhs11117 ctss	0	0	90.309	0
liver, neonate N03 : CNhs11123 ctss	0	0	88.409	0.824
liver, neonate N06 : CNhs11101 ctss	0	0	30.191	0
liver, neonate N07 : CNhs11103 ctss	0	0	75.545	0
liver, neonate N10 : CNhs11115 ctss	0	0	89.867	0
liver, neonate N20 : CNhs11220 ctss	0	0	64.408	1.515
liver, neonate N25 : CNhs11198 ctss	0	0	64.583	2.332
liver, neonate N30 : CNhs11106 ctss	0	0	55.963	0
lung, adult : CNhs10474 ctss	0	0	125.078	3.695
lung, embryo E12 : CNhs10522 ctss	0	0	144.013	1.895
lung, embryo E14 : CNhs10604 ctss	9.285	0	139.498	1.141
lung, embryo E15 : CNhs11020 ctss	9.289	0	151.243	1.018
lung, embryo E16 : CNhs10998 ctss	4.413	0	144.335	1.878
lung, embryo E17 : CNhs10605 ctss	1.408	0	118.929	1.508
lung, embryo E18 : CNhs10583 ctss	2.01	0	141.636	1.19
lung, neonate N00 : CNhs11224 ctss	0	0	119.227	2.927
lung, neonate N06 : CNhs11212 ctss	4.488	0	135.566	0.788
lung, neonate N07 : CNhs11111 ctss	0.473	0	125.57	0
lung, neonate N10 : CNhs11219 ctss	0.886	0	132.985	2.073
lung, neonate N20 : CNhs11109 ctss	1.276	0	115.36	4.26
lung, neonate N25 : CNhs11119 ctss	0.819	0	113.799	1.9
lung, neonate N30 : CNhs11133 ctss	0.518	0	133.8	5.641
macrophage, bone marrow derived : CNhs14136 ctss	0	0	88.924	2.483
macrophage, bone marrow derived, pool1 : CNhs11457 ctss	0	0	33.174	0
macrophage, bone marrow derived, pool2 : CNhs11532 ctss	0	0	37.529	0
macrophage, bone marrow derived, pool3 : CNhs11632 ctss	0	0	39.93	1.338
macrophage, TB infection, non-stimulated BMDM, with Mtb, 028hr(004h after stimulation), biol rep1 : CNhs11507 ctss	0	0	17.456	0
macrophage, TB infection, non-stimulated BMDM, with Mtb, 028hr(004h after stimulation), biol rep2 : CNhs11582 ctss	0	0	9.967	0
macrophage, TB infection, non-stimulated BMDM, with Mtb, 028hr(004h after stimulation), biol rep4 : CNhs14347 ctss	0	0	41.349	0
macrophage, TB infection, non-stimulated BMDM, with Mtb, 036hr(012h after stimulation), biol rep1 : CNhs11508 ctss	0	0	15.741	0
macrophage, TB infection, non-stimulated BMDM, with Mtb, 036hr(012h after stimulation), biol rep2 : CNhs11583 ctss	0	0	23.096	0
macrophage, TB infection, non-stimulated BMDM, with Mtb, 036hr(012h after stimulation), biol rep4 : CNhs14348 ctss	0	0	39.993	0.597
macrophage, TB infection, non-stimulated BMDM, with Mtb, 048hr(024h after stimulation), biol rep1 : CNhs11509 ctss	0	0	23.321	0
macrophage, TB infection, non-stimulated BMDM, with Mtb, 048hr(024h after stimulation), biol rep2 : CNhs11584 ctss	0	0	22.845	0
macrophage, TB infection, non-stimulated BMDM, with Mtb, 048hr(024h after stimulation), biol rep4 : CNhs14349 ctss	0	0	43.443	1.459
macrophage, TB infection, non-stimulated BMDM, with Mtb, 072hr(048h after stimulation), biol rep1 : CNhs11510 ctss	0	0	8.673	0
macrophage, TB infection, non-stimulated BMDM, with Mtb, 072hr(048h after stimulation), biol rep2 : CNhs11585 ctss	0	0	0	0
macrophage, TB infection, non-stimulated BMDM, with Mtb, 072hr(048h after stimulation), biol rep4 : CNhs14350 ctss	0	0	48.115	1.418
macrophage, TB infection, non-stimulated BMDM, with Mtb, 120hr(096h after stimulation), biol rep1 : CNhs11511 ctss	0	0	34.799	0
macrophage, TB infection, non-stimulated BMDM, with Mtb, 120hr(096h after stimulation), biol rep2 : CNhs11586 ctss	0	0	0	0
macrophage, TB infection, non-stimulated BMDM, with Mtb, 120hr(096h after stimulation), biol rep4 : CNhs14351 ctss	0	0	0	0
macrophage, TB infection, non-stimulated BMDM, without Mtb, 004hr, biol rep3 : CNhs11633 ctss	0	0	43.701	0.953
macrophage, TB infection, non-stimulated BMDM, without Mtb, 006hr, biol rep3 : CNhs11634 ctss	0	0	45.85	1.131
macrophage, TB infection, non-stimulated BMDM, without Mtb, 012hr, biol rep3 : CNhs11635 ctss	0	0	58.169	1.284
macrophage, TB infection, non-stimulated BMDM, without Mtb, 024hr, biol rep1 : CNhs11458 ctss	0	0	16.826	0
macrophage, TB infection, non-stimulated BMDM, without Mtb, 024hr, biol rep2 : CNhs11533 ctss	0	0	34.581	0
macrophage, TB infection, non-stimulated BMDM, without Mtb, 024hr, biol rep3 : CNhs11636 ctss	0	0	63.874	1.751
macrophage, TB infection, non-stimulated BMDM, without Mtb, 024hr, biol rep4 : CNhs14342 ctss	0	0	66.068	3.054
macrophage, TB infection, non-stimulated BMDM, without Mtb, 028hr, biol rep1 : CNhs11459 ctss	0	0	14.091	0
macrophage, TB infection, non-stimulated BMDM, without Mtb, 028hr, biol rep2 : CNhs11534 ctss	0	0	45.197	1.832
macrophage, TB infection, non-stimulated BMDM, without Mtb, 028hr, biol rep3 : CNhs11637 ctss	0	0	68.061	1.793
macrophage, TB infection, non-stimulated BMDM, without Mtb, 036hr, biol rep1 : CNhs11460 ctss	0	0	16.946	0
macrophage, TB infection, non-stimulated BMDM, without Mtb, 036hr, biol rep2 : CNhs11535 ctss	0	0	38.665	0
macrophage, TB infection, non-stimulated BMDM, without Mtb, 036hr, biol rep3 : CNhs14298 ctss	0	0	60.892	3.294
macrophage, TB infection, non-stimulated BMDM, without Mtb, 048hr, biol rep1 : CNhs11461 ctss	0	0	11.697	0
macrophage, TB infection, non-stimulated BMDM, without Mtb, 048hr, biol rep2 : CNhs11536 ctss	0	0	61.844	0
macrophage, TB infection, non-stimulated BMDM, without Mtb, 048hr, biol rep3 : CNhs14299 ctss	0	0	72.248	1.892
macrophage, TB infection, non-stimulated BMDM, without Mtb, 072hr, biol rep1 : CNhs11462 ctss	0	0	0	0
macrophage, TB infection, non-stimulated BMDM, without Mtb, 072hr, biol rep2 : CNhs11537 ctss	0	0	29.284	0
macrophage, TB infection, non-stimulated BMDM, without Mtb, 072hr, biol rep3 : CNhs14300 ctss	0	0	86.013	2.978
macrophage, TB infection, non-stimulated BMDM, without Mtb, 120hr, biol rep1 : CNhs11463 ctss	0	0	4.684	0
macrophage, TB infection, non-stimulated BMDM, without Mtb, 120hr, biol rep2 : CNhs11538 ctss	0	0	68.595	0
macrophage, TB infection, non-stimulated BMDM, without Mtb, 120hr, biol rep3 : CNhs14301 ctss	0	0	89.578	2.942
macrophage, TB infection, stimulated BMDM+IFNg(caMph), with Mtb, 028hr(004h after stimulation), biol rep1 : CNhs11512 ctss	0	0	21.447	0
macrophage, TB infection, stimulated BMDM+IFNg(caMph), with Mtb, 028hr(004h after stimulation), biol rep2 : CNhs11587 ctss	0	0	0	0
macrophage, TB infection, stimulated BMDM+IFNg(caMph), with Mtb, 028hr(004h after stimulation), biol rep4 : CNhs14352 ctss	0	0	42.243	0
macrophage, TB infection, stimulated BMDM+IFNg(caMph), with Mtb, 036hr(012h after stimulation), biol rep1 : CNhs11513 ctss	0	0	11.102	0
macrophage, TB infection, stimulated BMDM+IFNg(caMph), with Mtb, 036hr(012h after stimulation), biol rep2 : CNhs11588 ctss	0	0	0	0
macrophage, TB infection, stimulated BMDM+IFNg(caMph), with Mtb, 036hr(012h after stimulation), biol rep4 : CNhs14353 ctss	0	0	27.287	0.555
macrophage, TB infection, stimulated BMDM+IFNg(caMph), with Mtb, 048hr(024h after stimulation), biol rep1 : CNhs11514 ctss	0	0	6.885	0
macrophage, TB infection, stimulated BMDM+IFNg(caMph), with Mtb, 048hr(024h after stimulation), biol rep2 : CNhs11614 ctss	0	0	31.404	1.193
macrophage, TB infection, stimulated BMDM+IFNg(caMph), with Mtb, 048hr(024h after stimulation), biol rep4 : CNhs14354 ctss	0	0	25.337	1.186
macrophage, TB infection, stimulated BMDM+IFNg(caMph), with Mtb, 072hr(048h after stimulation), biol rep1 : CNhs11515 ctss	0	0	22.701	0
macrophage, TB infection, stimulated BMDM+IFNg(caMph), with Mtb, 072hr(048h after stimulation), biol rep2 : CNhs11615 ctss	0	0	33.965	0.529
macrophage, TB infection, stimulated BMDM+IFNg(caMph), with Mtb, 072hr(048h after stimulation), biol rep4 : CNhs14355 ctss	0	0	42.268	5.696
macrophage, TB infection, stimulated BMDM+IFNg(caMph), with Mtb, 120hr(096h after stimulation), biol rep1 : CNhs11516 ctss	0	0	24.949	2.495
macrophage, TB infection, stimulated BMDM+IFNg(caMph), with Mtb, 120hr(096h after stimulation), biol rep2 : CNhs11616 ctss	0	0	81.633	3.68
macrophage, TB infection, stimulated BMDM+IFNg(caMph), with Mtb, 120hr(096h after stimulation), biol rep4 : CNhs14356 ctss	0	0	34.652	7.447
macrophage, TB infection, stimulated BMDM+IFNg(caMph), without Mtb, 002hr, biol rep1 : CNhs11464 ctss	0	0	24.673	0
macrophage, TB infection, stimulated BMDM+IFNg(caMph), without Mtb, 002hr, biol rep2 : CNhs11539 ctss	0	0	28.453	0
macrophage, TB infection, stimulated BMDM+IFNg(caMph), without Mtb, 002hr, biol rep3 : CNhs11638 ctss	0	0	49.275	1.633
macrophage, TB infection, stimulated BMDM+IFNg(caMph), without Mtb, 004hr, biol rep1 : CNhs11465 ctss	0	0	16.629	0
macrophage, TB infection, stimulated BMDM+IFNg(caMph), without Mtb, 004hr, biol rep2 : CNhs11540 ctss	0	0	23.099	0
macrophage, TB infection, stimulated BMDM+IFNg(caMph), without Mtb, 004hr, biol rep3 : CNhs11639 ctss	0	0	42.42	0.219
macrophage, TB infection, stimulated BMDM+IFNg(caMph), without Mtb, 006hr, biol rep1 : CNhs11466 ctss	0	0	12.048	0
macrophage, TB infection, stimulated BMDM+IFNg(caMph), without Mtb, 006hr, biol rep2 : CNhs11541 ctss	0	0	26.611	0
macrophage, TB infection, stimulated BMDM+IFNg(caMph), without Mtb, 006hr, biol rep3 : CNhs11640 ctss	0	0	49.688	1.343
macrophage, TB infection, stimulated BMDM+IFNg(caMph), without Mtb, 012hr, biol rep1 : CNhs11467 ctss	0	0	9.681	0
macrophage, TB infection, stimulated BMDM+IFNg(caMph), without Mtb, 012hr, biol rep2 : CNhs11542 ctss	0	0	28.002	0
macrophage, TB infection, stimulated BMDM+IFNg(caMph), without Mtb, 012hr, biol rep3 : CNhs11641 ctss	0	0	45.46	1.012
macrophage, TB infection, stimulated BMDM+IFNg(caMph), without Mtb, 024hr, biol rep1 : CNhs11468 ctss	0	0	4.963	0
macrophage, TB infection, stimulated BMDM+IFNg(caMph), without Mtb, 024hr, biol rep2 : CNhs11543 ctss	0	0	41.267	0
macrophage, TB infection, stimulated BMDM+IFNg(caMph), without Mtb, 024hr, biol rep3 : CNhs11642 ctss	0	0	53.114	1.885
macrophage, TB infection, stimulated BMDM+IFNg(caMph), without Mtb, 024hr, biol rep4 : CNhs14343 ctss	0	0	54.804	0.701
macrophage, TB infection, stimulated BMDM+IFNg(caMph), without Mtb, 028hr, biol rep1 : CNhs11469 ctss	0	0	12.161	0
macrophage, TB infection, stimulated BMDM+IFNg(caMph), without Mtb, 028hr, biol rep2 : CNhs11547 ctss	0	0	27.853	0
macrophage, TB infection, stimulated BMDM+IFNg(caMph), without Mtb, 028hr, biol rep3 : CNhs11643 ctss	0	0	56.695	1.246
macrophage, TB infection, stimulated BMDM+IFNg(caMph), without Mtb, 036hr, biol rep1 : CNhs11470 ctss	0	0	8.393	0
macrophage, TB infection, stimulated BMDM+IFNg(caMph), without Mtb, 036hr, biol rep2 : CNhs11548 ctss	0	0	22.576	0
macrophage, TB infection, stimulated BMDM+IFNg(caMph), without Mtb, 036hr, biol rep3 : CNhs14302 ctss	0	0	52.77	2.271
macrophage, TB infection, stimulated BMDM+IFNg(caMph), without Mtb, 048hr, biol rep1 : CNhs11471 ctss	0	0	5.339	0
macrophage, TB infection, stimulated BMDM+IFNg(caMph), without Mtb, 048hr, biol rep2 : CNhs11549 ctss	0	0	16.377	0
macrophage, TB infection, stimulated BMDM+IFNg(caMph), without Mtb, 048hr, biol rep3 : CNhs14303 ctss	0	0	53.589	2.57
macrophage, TB infection, stimulated BMDM+IFNg(caMph), without Mtb, 072hr, biol rep1 : CNhs11472 ctss	0	0	0	0
macrophage, TB infection, stimulated BMDM+IFNg(caMph), without Mtb, 072hr, biol rep2 : CNhs11550 ctss	0	0	40.461	0
macrophage, TB infection, stimulated BMDM+IFNg(caMph), without Mtb, 072hr, biol rep3 : CNhs14304 ctss	0	0	72.901	2.621
macrophage, TB infection, stimulated BMDM+IFNg(caMph), without Mtb, 120hr, biol rep1 : CNhs11473 ctss	0	0	7.417	0
macrophage, TB infection, stimulated BMDM+IFNg(caMph), without Mtb, 120hr, biol rep2 : CNhs11551 ctss	0	0	48.515	0
macrophage, TB infection, stimulated BMDM+IFNg(caMph), without Mtb, 120hr, biol rep3 : CNhs14305 ctss	0	0	74.778	4.167
macrophage, TB infection, stimulated BMDM+IL-13(aaMph), with Mtb, 028hr(004h after stimulation), biol rep1 : CNhs11517 ctss	0	0	10.639	0
macrophage, TB infection, stimulated BMDM+IL-13(aaMph), with Mtb, 028hr(004h after stimulation), biol rep2 : CNhs11617 ctss	0	0	37.743	0
macrophage, TB infection, stimulated BMDM+IL-13(aaMph), with Mtb, 028hr(004h after stimulation), biol rep4 : CNhs14357 ctss	0	0	57.754	0.397
macrophage, TB infection, stimulated BMDM+IL-13(aaMph), with Mtb, 036hr(012h after stimulation), biol rep1 : CNhs11518 ctss	0	0	22.66	0
macrophage, TB infection, stimulated BMDM+IL-13(aaMph), with Mtb, 036hr(012h after stimulation), biol rep2 : CNhs11618 ctss	0	0	35.995	1.54
macrophage, TB infection, stimulated BMDM+IL-13(aaMph), with Mtb, 048hr(024h after stimulation), biol rep1 : CNhs11519 ctss	0	0	3.307	0
macrophage, TB infection, stimulated BMDM+IL-13(aaMph), with Mtb, 048hr(024h after stimulation), biol rep2 : CNhs11619 ctss	0	0	42.717	3.126
macrophage, TB infection, stimulated BMDM+IL-13(aaMph), with Mtb, 048hr(024h after stimulation), biol rep4 : CNhs14359 ctss	0	0	0	0
macrophage, TB infection, stimulated BMDM+IL-13(aaMph), with Mtb, 072hr(048h after stimulation), biol rep1 : CNhs11520 ctss	0	0	29.055	0
macrophage, TB infection, stimulated BMDM+IL-13(aaMph), with Mtb, 072hr(048h after stimulation), biol rep2 : CNhs11620 ctss	0	0	45.117	0.915
macrophage, TB infection, stimulated BMDM+IL-13(aaMph), with Mtb, 072hr(048h after stimulation), biol rep4 : CNhs14360 ctss	0	0	60.693	0
macrophage, TB infection, stimulated BMDM+IL-13(aaMph), with Mtb, 120hr(096h after stimulation), biol rep1 : CNhs11521 ctss	0	0	16.159	0
macrophage, TB infection, stimulated BMDM+IL-13(aaMph), with Mtb, 120hr(096h after stimulation), biol rep2 : CNhs11621 ctss	0	0	61.173	2.008
macrophage, TB infection, stimulated BMDM+IL-13(aaMph), with Mtb, 120hr(096h after stimulation), biol rep4 : CNhs14361 ctss	0	0	65.972	0.89
macrophage, TB infection, stimulated BMDM+IL-13(aaMph), without Mtb, 002hr, biol rep1 : CNhs11474 ctss	0	0	31.156	0
macrophage, TB infection, stimulated BMDM+IL-13(aaMph), without Mtb, 002hr, biol rep2 : CNhs11552 ctss	0	0	18.53	0
macrophage, TB infection, stimulated BMDM+IL-13(aaMph), without Mtb, 002hr, biol rep3 : CNhs11644 ctss	0	0	47.175	0.214
macrophage, TB infection, stimulated BMDM+IL-13(aaMph), without Mtb, 004hr, biol rep1 : CNhs11475 ctss	0	0	12.903	0
macrophage, TB infection, stimulated BMDM+IL-13(aaMph), without Mtb, 004hr, biol rep2 : CNhs11553 ctss	0	0	20.109	0
macrophage, TB infection, stimulated BMDM+IL-13(aaMph), without Mtb, 004hr, biol rep3 : CNhs11645 ctss	0	0	50.079	1.003
macrophage, TB infection, stimulated BMDM+IL-13(aaMph), without Mtb, 006hr, biol rep1 : CNhs11476 ctss	0	0	10.694	0
macrophage, TB infection, stimulated BMDM+IL-13(aaMph), without Mtb, 006hr, biol rep2 : CNhs11554 ctss	0	0	33.877	0
macrophage, TB infection, stimulated BMDM+IL-13(aaMph), without Mtb, 006hr, biol rep3 : CNhs11646 ctss	0	0	53.868	2.455
macrophage, TB infection, stimulated BMDM+IL-13(aaMph), without Mtb, 012hr, biol rep1 : CNhs11477 ctss	0	0	0	0
macrophage, TB infection, stimulated BMDM+IL-13(aaMph), without Mtb, 012hr, biol rep2 : CNhs11555 ctss	0	0	19.237	0
macrophage, TB infection, stimulated BMDM+IL-13(aaMph), without Mtb, 012hr, biol rep3 : CNhs11647 ctss	0	0	65.985	0.333
macrophage, TB infection, stimulated BMDM+IL-13(aaMph), without Mtb, 024hr, biol rep1 : CNhs11478 ctss	0	0	14.949	0
macrophage, TB infection, stimulated BMDM+IL-13(aaMph), without Mtb, 024hr, biol rep2 : CNhs11556 ctss	0	0	27.188	0
macrophage, TB infection, stimulated BMDM+IL-13(aaMph), without Mtb, 024hr, biol rep3 : CNhs11648 ctss	0	0	66.526	1.071
macrophage, TB infection, stimulated BMDM+IL-13(aaMph), without Mtb, 024hr, biol rep4 : CNhs14344 ctss	0	0	11.552	0
macrophage, TB infection, stimulated BMDM+IL-13(aaMph), without Mtb, 028hr, biol rep1 : CNhs11479 ctss	0	0	19.207	0
macrophage, TB infection, stimulated BMDM+IL-13(aaMph), without Mtb, 028hr, biol rep2 : CNhs11557 ctss	0	0	20.499	0
macrophage, TB infection, stimulated BMDM+IL-13(aaMph), without Mtb, 028hr, biol rep3 : CNhs11649 ctss	0	0	66.42	2.558
macrophage, TB infection, stimulated BMDM+IL-13(aaMph), without Mtb, 036hr, biol rep1 : CNhs11480 ctss	0	0	15.067	0
macrophage, TB infection, stimulated BMDM+IL-13(aaMph), without Mtb, 036hr, biol rep2 : CNhs11558 ctss	0	0	11.77	0
macrophage, TB infection, stimulated BMDM+IL-13(aaMph), without Mtb, 036hr, biol rep3 : CNhs14306 ctss	0	0	61.415	1.067
macrophage, TB infection, stimulated BMDM+IL-13(aaMph), without Mtb, 048hr, biol rep1 : CNhs11481 ctss	0	0	7.952	0
macrophage, TB infection, stimulated BMDM+IL-13(aaMph), without Mtb, 048hr, biol rep2 : CNhs11559 ctss	0	0	35.53	0
macrophage, TB infection, stimulated BMDM+IL-13(aaMph), without Mtb, 048hr, biol rep3 : CNhs14307 ctss	0	0	73.625	2.384
macrophage, TB infection, stimulated BMDM+IL-13(aaMph), without Mtb, 072hr, biol rep1 : CNhs11482 ctss	0	0	13.664	0
macrophage, TB infection, stimulated BMDM+IL-13(aaMph), without Mtb, 072hr, biol rep2 : CNhs11560 ctss	0	0	45.004	0
macrophage, TB infection, stimulated BMDM+IL-13(aaMph), without Mtb, 072hr, biol rep3 : CNhs14308 ctss	0	0	106.115	1.617
macrophage, TB infection, stimulated BMDM+IL-13(aaMph), without Mtb, 120hr, biol rep1 : CNhs11483 ctss	0	0	3.3	3.3
macrophage, TB infection, stimulated BMDM+IL-13(aaMph), without Mtb, 120hr, biol rep2 : CNhs11561 ctss	0	0	32.281	0
macrophage, TB infection, stimulated BMDM+IL-13(aaMph), without Mtb, 120hr, biol rep3 : CNhs14309 ctss	0	0	92.188	1.08
macrophage, TB infection, stimulated BMDM+IL-4(aaMph), with Mtb, 028hr(004h after stimulation), biol rep1 : CNhs11527 ctss	0	0	15.501	0
macrophage, TB infection, stimulated BMDM+IL-4(aaMph), with Mtb, 028hr(004h after stimulation), biol rep2 : CNhs11627 ctss	0	0	32.101	0
macrophage, TB infection, stimulated BMDM+IL-4(aaMph), with Mtb, 028hr(004h after stimulation), biol rep4 : CNhs14367 ctss	0	0	50.509	0.432
macrophage, TB infection, stimulated BMDM+IL-4(aaMph), with Mtb, 036hr(012h after stimulation), biol rep1 : CNhs11528 ctss	0	0	32.791	0
macrophage, TB infection, stimulated BMDM+IL-4(aaMph), with Mtb, 036hr(012h after stimulation), biol rep2 : CNhs11628 ctss	0	0	37.802	1.8
macrophage, TB infection, stimulated BMDM+IL-4(aaMph), with Mtb, 036hr(012h after stimulation), biol rep4 : CNhs14368 ctss	0	0	42.939	0.907
macrophage, TB infection, stimulated BMDM+IL-4(aaMph), with Mtb, 048hr(024h after stimulation), biol rep1 : CNhs11529 ctss	0	0	16.717	0
macrophage, TB infection, stimulated BMDM+IL-4(aaMph), with Mtb, 048hr(024h after stimulation), biol rep2 : CNhs11629 ctss	0	0	42.735	1.309
macrophage, TB infection, stimulated BMDM+IL-4(aaMph), with Mtb, 048hr(024h after stimulation), biol rep4 : CNhs14369 ctss	0	0	31.611	2.107
macrophage, TB infection, stimulated BMDM+IL-4(aaMph), with Mtb, 072hr(048h after stimulation), biol rep1 : CNhs11530 ctss	0	0	27.755	0
macrophage, TB infection, stimulated BMDM+IL-4(aaMph), with Mtb, 072hr(048h after stimulation), biol rep2 : CNhs11630 ctss	0	0	38.792	0.318
macrophage, TB infection, stimulated BMDM+IL-4(aaMph), with Mtb, 072hr(048h after stimulation), biol rep4 : CNhs14370 ctss	0	0	51.648	3.705
macrophage, TB infection, stimulated BMDM+IL-4(aaMph), with Mtb, 120hr(096h after stimulation), biol rep1 : CNhs11531 ctss	0	0	52.498	0
macrophage, TB infection, stimulated BMDM+IL-4(aaMph), with Mtb, 120hr(096h after stimulation), biol rep2 : CNhs11631 ctss	0	0	54.386	0.755
macrophage, TB infection, stimulated BMDM+IL-4(aaMph), with Mtb, 120hr(096h after stimulation), biol rep4 : CNhs14371 ctss	0	0	68.944	3.451
macrophage, TB infection, stimulated BMDM+IL-4(aaMph), without Mtb, 002hr, biol rep1 : CNhs11494 ctss	0	0	28.407	0
macrophage, TB infection, stimulated BMDM+IL-4(aaMph), without Mtb, 002hr, biol rep2 : CNhs11572 ctss	0	0	0	0
macrophage, TB infection, stimulated BMDM+IL-4(aaMph), without Mtb, 002hr, biol rep3 : CNhs11655 ctss	0	0	43.878	0.754
macrophage, TB infection, stimulated BMDM+IL-4(aaMph), without Mtb, 004hr, biol rep1 : CNhs11495 ctss	0	0	23.746	0
macrophage, TB infection, stimulated BMDM+IL-4(aaMph), without Mtb, 004hr, biol rep2 : CNhs11573 ctss	0	0	18.452	0
macrophage, TB infection, stimulated BMDM+IL-4(aaMph), without Mtb, 004hr, biol rep3 : CNhs14259 ctss	0	0	32.587	2.607
macrophage, TB infection, stimulated BMDM+IL-4(aaMph), without Mtb, 006hr, biol rep1 : CNhs11496 ctss	0	0	25.133	0
macrophage, TB infection, stimulated BMDM+IL-4(aaMph), without Mtb, 006hr, biol rep2 : CNhs11574 ctss	0	0	29.65	0
macrophage, TB infection, stimulated BMDM+IL-4(aaMph), without Mtb, 006hr, biol rep3 : CNhs14260 ctss	0	0	45.046	2.79
macrophage, TB infection, stimulated BMDM+IL-4(aaMph), without Mtb, 012hr, biol rep1 : CNhs11497 ctss	0	0	32.513	0
macrophage, TB infection, stimulated BMDM+IL-4(aaMph), without Mtb, 012hr, biol rep2 : CNhs11575 ctss	0	0	33.716	0
macrophage, TB infection, stimulated BMDM+IL-4(aaMph), without Mtb, 012hr, biol rep3 : CNhs14261 ctss	0	0	61.884	0.788
macrophage, TB infection, stimulated BMDM+IL-4(aaMph), without Mtb, 024hr, biol rep1 : CNhs11498 ctss	0	0	20.849	0
macrophage, TB infection, stimulated BMDM+IL-4(aaMph), without Mtb, 024hr, biol rep2 : CNhs11576 ctss	0	0	39.097	0
macrophage, TB infection, stimulated BMDM+IL-4(aaMph), without Mtb, 024hr, biol rep3 : CNhs14262 ctss	0	0	65.829	1.797
macrophage, TB infection, stimulated BMDM+IL-4(aaMph), without Mtb, 024hr, biol rep4 : CNhs14346 ctss	0	0	61.169	2.942
macrophage, TB infection, stimulated BMDM+IL-4(aaMph), without Mtb, 028hr, biol rep1 : CNhs11502 ctss	0	0	18.105	0
macrophage, TB infection, stimulated BMDM+IL-4(aaMph), without Mtb, 028hr, biol rep2 : CNhs11577 ctss	0	0	0	0
macrophage, TB infection, stimulated BMDM+IL-4(aaMph), without Mtb, 028hr, biol rep3 : CNhs14263 ctss	0	0	63.624	2.499
macrophage, TB infection, stimulated BMDM+IL-4(aaMph), without Mtb, 036hr, biol rep1 : CNhs11503 ctss	0	0	21.954	1.062
macrophage, TB infection, stimulated BMDM+IL-4(aaMph), without Mtb, 036hr, biol rep2 : CNhs11578 ctss	0	0	18.441	0
macrophage, TB infection, stimulated BMDM+IL-4(aaMph), without Mtb, 036hr, biol rep3 : CNhs14264 ctss	0	0	82.65	2.931
macrophage, TB infection, stimulated BMDM+IL-4(aaMph), without Mtb, 048hr, biol rep1 : CNhs11504 ctss	0	0	19.238	0
macrophage, TB infection, stimulated BMDM+IL-4(aaMph), without Mtb, 048hr, biol rep2 : CNhs11579 ctss	0	0	37.698	0
macrophage, TB infection, stimulated BMDM+IL-4(aaMph), without Mtb, 048hr, biol rep3 : CNhs14265 ctss	0	0	79.388	1.817
macrophage, TB infection, stimulated BMDM+IL-4(aaMph), without Mtb, 072hr, biol rep1 : CNhs11505 ctss	0	0	19.734	0.918
macrophage, TB infection, stimulated BMDM+IL-4(aaMph), without Mtb, 072hr, biol rep2 : CNhs11580 ctss	0	0	39.074	0
macrophage, TB infection, stimulated BMDM+IL-4(aaMph), without Mtb, 072hr, biol rep3 : CNhs14266 ctss	0	0	95.028	0.86
macrophage, TB infection, stimulated BMDM+IL-4(aaMph), without Mtb, 120hr, biol rep1 : CNhs11506 ctss	0	0	20.44	0
macrophage, TB infection, stimulated BMDM+IL-4(aaMph), without Mtb, 120hr, biol rep2 : CNhs11581 ctss	0	0	16.424	0
macrophage, TB infection, stimulated BMDM+IL-4(aaMph), without Mtb, 120hr, biol rep3 : CNhs14267 ctss	0	0	98.215	1.31
macrophage, TB infection, stimulated BMDM+IL-4/IL-13(aaMph), with Mtb, 028hr(004h after stimulation), biol rep1 : CNhs11522 ctss	0	0	13.98	0
macrophage, TB infection, stimulated BMDM+IL-4/IL-13(aaMph), with Mtb, 028hr(004h after stimulation), biol rep2 : CNhs11622 ctss	0	0	39.803	0
macrophage, TB infection, stimulated BMDM+IL-4/IL-13(aaMph), with Mtb, 028hr(004h after stimulation), biol rep4 : CNhs14362 ctss	0	0	43.493	0.623
macrophage, TB infection, stimulated BMDM+IL-4/IL-13(aaMph), with Mtb, 036hr(012h after stimulation), biol rep1 : CNhs11523 ctss	0	0	24.173	0
macrophage, TB infection, stimulated BMDM+IL-4/IL-13(aaMph), with Mtb, 036hr(012h after stimulation), biol rep2 : CNhs11623 ctss	0	0	40.715	0.365
macrophage, TB infection, stimulated BMDM+IL-4/IL-13(aaMph), with Mtb, 036hr(012h after stimulation), biol rep4 : CNhs14363 ctss	0	0	36.471	1.67
macrophage, TB infection, stimulated BMDM+IL-4/IL-13(aaMph), with Mtb, 048hr(024h after stimulation), biol rep1 : CNhs11524 ctss	0	0	22.476	0
macrophage, TB infection, stimulated BMDM+IL-4/IL-13(aaMph), with Mtb, 048hr(024h after stimulation), biol rep2 : CNhs11624 ctss	0	0	47.485	1.552
macrophage, TB infection, stimulated BMDM+IL-4/IL-13(aaMph), with Mtb, 048hr(024h after stimulation), biol rep4 : CNhs14364 ctss	0	0	39.13	1.766
macrophage, TB infection, stimulated BMDM+IL-4/IL-13(aaMph), with Mtb, 072hr(048h after stimulation), biol rep1 : CNhs11525 ctss	0	0	27.935	0
macrophage, TB infection, stimulated BMDM+IL-4/IL-13(aaMph), with Mtb, 072hr(048h after stimulation), biol rep2 : CNhs11625 ctss	0	0	39.134	0.929
macrophage, TB infection, stimulated BMDM+IL-4/IL-13(aaMph), with Mtb, 072hr(048h after stimulation), biol rep4 : CNhs14365 ctss	0	0	29.652	1.57
macrophage, TB infection, stimulated BMDM+IL-4/IL-13(aaMph), with Mtb, 120hr(096h after stimulation), biol rep1 : CNhs11526 ctss	0	0	51.191	0
macrophage, TB infection, stimulated BMDM+IL-4/IL-13(aaMph), with Mtb, 120hr(096h after stimulation), biol rep2 : CNhs11626 ctss	0	0	48.261	0.373
macrophage, TB infection, stimulated BMDM+IL-4/IL-13(aaMph), with Mtb, 120hr(096h after stimulation), biol rep4 : CNhs14366 ctss	0	0	61.592	3.313
macrophage, TB infection, stimulated BMDM+IL-4/IL-13(aaMph), without Mtb, 002hr, biol rep1 : CNhs11484 ctss	0	0	18.754	0
macrophage, TB infection, stimulated BMDM+IL-4/IL-13(aaMph), without Mtb, 002hr, biol rep2 : CNhs11562 ctss	0	0	24.816	0
macrophage, TB infection, stimulated BMDM+IL-4/IL-13(aaMph), without Mtb, 002hr, biol rep3 : CNhs11650 ctss	0	0	48.177	0.504
macrophage, TB infection, stimulated BMDM+IL-4/IL-13(aaMph), without Mtb, 004hr, biol rep1 : CNhs11485 ctss	0	0	15.18	0
macrophage, TB infection, stimulated BMDM+IL-4/IL-13(aaMph), without Mtb, 004hr, biol rep2 : CNhs11563 ctss	0	0	17.45	0
macrophage, TB infection, stimulated BMDM+IL-4/IL-13(aaMph), without Mtb, 004hr, biol rep3 : CNhs11651 ctss	0	0	43.473	1.317
macrophage, TB infection, stimulated BMDM+IL-4/IL-13(aaMph), without Mtb, 006hr, biol rep1 : CNhs11486 ctss	0	0	19.337	0
macrophage, TB infection, stimulated BMDM+IL-4/IL-13(aaMph), without Mtb, 006hr, biol rep2 : CNhs11564 ctss	0	0	24.681	0
macrophage, TB infection, stimulated BMDM+IL-4/IL-13(aaMph), without Mtb, 006hr, biol rep3 : CNhs11652 ctss	0	0	51.539	2.346
macrophage, TB infection, stimulated BMDM+IL-4/IL-13(aaMph), without Mtb, 012hr, biol rep1 : CNhs11487 ctss	0	0	26.006	0
macrophage, TB infection, stimulated BMDM+IL-4/IL-13(aaMph), without Mtb, 012hr, biol rep2 : CNhs11565 ctss	0	0	23.008	0
macrophage, TB infection, stimulated BMDM+IL-4/IL-13(aaMph), without Mtb, 012hr, biol rep3 : CNhs11653 ctss	0	0	73.068	0.927
macrophage, TB infection, stimulated BMDM+IL-4/IL-13(aaMph), without Mtb, 024hr, biol rep1 : CNhs11488 ctss	0	0	24.492	0
macrophage, TB infection, stimulated BMDM+IL-4/IL-13(aaMph), without Mtb, 024hr, biol rep2 : CNhs11566 ctss	0	0	27.049	0
macrophage, TB infection, stimulated BMDM+IL-4/IL-13(aaMph), without Mtb, 024hr, biol rep3 : CNhs11654 ctss	0	0	79.231	1.337
macrophage, TB infection, stimulated BMDM+IL-4/IL-13(aaMph), without Mtb, 024hr, biol rep4 : CNhs14345 ctss	0	0	67.136	3.036
macrophage, TB infection, stimulated BMDM+IL-4/IL-13(aaMph), without Mtb, 028hr, biol rep1 : CNhs11489 ctss	0	0	8.956	0
macrophage, TB infection, stimulated BMDM+IL-4/IL-13(aaMph), without Mtb, 028hr, biol rep2 : CNhs11567 ctss	0	0	36.116	0
macrophage, TB infection, stimulated BMDM+IL-4/IL-13(aaMph), without Mtb, 028hr, biol rep3 : CNhs14254 ctss	0	0	66.319	2.167
macrophage, TB infection, stimulated BMDM+IL-4/IL-13(aaMph), without Mtb, 036hr, biol rep1 : CNhs11490 ctss	1.589	0	19.833	0
macrophage, TB infection, stimulated BMDM+IL-4/IL-13(aaMph), without Mtb, 036hr, biol rep2 : CNhs11568 ctss	0	0	30.67	0
macrophage, TB infection, stimulated BMDM+IL-4/IL-13(aaMph), without Mtb, 036hr, biol rep3 : CNhs14255 ctss	0	0	72.599	0.762
macrophage, TB infection, stimulated BMDM+IL-4/IL-13(aaMph), without Mtb, 048hr, biol rep1 : CNhs11491 ctss	0	0	0	0
macrophage, TB infection, stimulated BMDM+IL-4/IL-13(aaMph), without Mtb, 048hr, biol rep2 : CNhs11569 ctss	0	0	43.447	0
macrophage, TB infection, stimulated BMDM+IL-4/IL-13(aaMph), without Mtb, 048hr, biol rep3 : CNhs14256 ctss	0	0	81.958	0.955
macrophage, TB infection, stimulated BMDM+IL-4/IL-13(aaMph), without Mtb, 072hr, biol rep1 : CNhs11492 ctss	0.477	0	4.062	0
macrophage, TB infection, stimulated BMDM+IL-4/IL-13(aaMph), without Mtb, 072hr, biol rep2 : CNhs11570 ctss	0	0	37.724	0
macrophage, TB infection, stimulated BMDM+IL-4/IL-13(aaMph), without Mtb, 072hr, biol rep3 : CNhs14257 ctss	0	0	91.561	0
macrophage, TB infection, stimulated BMDM+IL-4/IL-13(aaMph), without Mtb, 120hr, biol rep1 : CNhs11493 ctss	0	0	9.828	0
macrophage, TB infection, stimulated BMDM+IL-4/IL-13(aaMph), without Mtb, 120hr, biol rep2 : CNhs11571 ctss	0	0	42.111	0
macrophage, TB infection, stimulated BMDM+IL-4/IL-13(aaMph), without Mtb, 120hr, biol rep3 : CNhs14258 ctss	0	0	93.621	0.792
mammary gland, adult lactating day02 : CNhs10480 ctss	0	0	13.278	2.951
mammary gland, adult pregnant day19 : CNhs10476 ctss	0	1.656	36.148	1.38
MC1+Gr1+ myeloid-derived suppressor cells cancer, donor1 (10,11,12 3LL) : CNhs12539 ctss	0	0	739.964	0
MC1+Gr1+ myeloid-derived suppressor cells cancer, donor2 (0127 3LL) : CNhs12198 ctss	0	0	427.39	3.125
MC1+Gr1+ myeloid-derived suppressor cells cancer, donor3 (0128 3LL) : CNhs12542 ctss	0	0	464.366	0
MC1+Gr1+ myeloid-derived suppressor cells control, donor1 (4,5,6PBS) : CNhs12540 ctss	0	0	675.878	0
MC1+Gr1+ myeloid-derived suppressor cells control, donor2 (0127 PBS) : CNhs12541 ctss	0	0	591.517	0
MC1+Gr1+ myeloid-derived suppressor cells control, donor3 (0128 PBS) : CNhs12543 ctss	0	0	539.888	0
medulla oblongata, adult : CNhs10477 ctss	0	0	267.959	1.124
medulla oblongata, neonate N30 : CNhs11200 ctss	6.904	0	273.455	3.985
Meningeal cells, donor1 : CNhs12132 ctss	7.033	0	167.728	2.372
Meningeal cells, donor2 : CNhs12358 ctss	0	0	146.818	2.506
Meningeal cells, donor3 : CNhs12109 ctss	2.506	0	144.955	0
Mesenchymal stem cells - bone marrow derived, donor1 : CNhs12628 ctss	0	0	25.647	3.15
Mesenchymal stem cells - bone marrow derived, donor2 : CNhs12633 ctss	0	0	15.822	0
Mesenchymal stem cells - bone marrow derived, donor3 : CNhs12616 ctss	0	0	10.657	4.263
Mesoderm, embryo E8.5 : CNhs14148 ctss	0	0	179.708	0
Microglia, donor1 : CNhs12629 ctss	0	0	70.406	1.798
Microglia, donor2 : CNhs12634 ctss	4.194	0	81.07	7.684
Microglia, donor3 : CNhs12617 ctss	17.674	0	0	0
mouse fibroblast cell line: CRL-1658 NIH/3T3 : CNhs11093 ctss	0	0	151.804	1.148
Mouse hepatocyte, donor5 : CNhs14553 ctss	0	0	0	0
Mouse hepatocyte, donor7 : CNhs14554 ctss	0	0	120.902	0
Mouse Renal epithelial cells, donor1 : CNhs14555 ctss	0	0	147.758	0
muscle (biceps femoris), neonate N30 : CNhs11129 ctss	100.95	0	40.9	3.03
natural helper cells, IL2 treated, day15, biol rep1, tech rep1 : CNhs12576 ctss	0	0	69.394	1.15
natural helper cells, IL2 treated, day15, biol rep1, tech rep2 : CNhs14330 ctss	0	0	21.47	0
natural helper cells, IL2 treated, day15, biol rep1, tech rep3 : CNhs14378 ctss	0	0	60.737	3.213
natural helper cells, IL2 treated, day15, biol rep2, tech rep1 : CNhs12508 ctss	0	0	61.758	1.7
natural helper cells, IL2 treated, day15, biol rep2, tech rep2 : CNhs14334 ctss	0	0	46.259	0
natural helper cells, IL2 treated, day15, biol rep2, tech rep3 : CNhs14388 ctss	0	0	48.151	5.441
natural helper cells, IL2 treated, day15, biol rep3, tech rep1 : CNhs12509 ctss	0	0	52.359	2.909
natural helper cells, IL2 treated, day15, biol rep3, tech rep2 : CNhs14335 ctss	0	0	0	0
natural helper cells, IL2 treated, day15, biol rep3, tech rep3 : CNhs14389 ctss	0	0	51.48	2.124
natural helper cells, IL33 treated, 01hr, biol rep1, tech rep1 : CNhs12579 ctss	0	0	14.337	0
natural helper cells, IL33 treated, 01hr, biol rep1, tech rep2 : CNhs14332 ctss	0	0	0	0
natural helper cells, IL33 treated, 01hr, biol rep1, tech rep3 : CNhs14383 ctss	0	0	21.43	0
natural helper cells, IL33 treated, 01hr, biol rep2, tech rep2 : CNhs14338 ctss	0	0	0	0
natural helper cells, IL33 treated, 01hr, biol rep2, tech rep3 : CNhs14384 ctss	0	0	17.801	0
natural helper cells, IL33 treated, 01hr, biol rep3, tech rep2 : CNhs14339 ctss	0	0	0	0
natural helper cells, IL33 treated, 01hr, biol rep3, tech rep3 : CNhs14380 ctss	0	0	22.374	1.398
natural helper cells, IL33 treated, day02, biol rep1, tech rep2 : CNhs14336 ctss	0	0	32.052	0
natural helper cells, IL33 treated, day02, biol rep1, tech rep3 : CNhs14386 ctss	0	0	65.042	9.662
natural helper cells, IL33 treated, day02, biol rep2, tech rep2 : CNhs14337 ctss	0	0	29.103	0
natural helper cells, IL33 treated, day02, biol rep2, tech rep3 : CNhs14385 ctss	0	0	72.988	10.534
natural helper cells, IL33 treated, day02, biol rep3, tech rep1 : CNhs12578 ctss	0	0	66.452	1.815
natural helper cells, IL33 treated, day02, biol rep3, tech rep2 : CNhs14331 ctss	0	0	33.398	0
natural helper cells, IL33 treated, day02, biol rep3, tech rep3 : CNhs14379 ctss	0	0	70.675	8.664
natural helper cells, naive, biol rep1, tech rep2 : CNhs14340 ctss	0	0	0	0
natural helper cells, naive, biol rep1, tech rep3 : CNhs14381 ctss	0	0	24.872	0.811
natural helper cells, naive, biol rep2, tech rep1 : CNhs12515 ctss	0	0	55.769	1.751
natural helper cells, naive, biol rep2, tech rep2 : CNhs14341 ctss	0	0	0	0
natural helper cells, naive, biol rep2, tech rep3 : CNhs14382 ctss	0	0	26.69	0
natural helper cells, naive, biol rep3, tech rep1 : CNhs12580 ctss	0	0	37.745	0
natural helper cells, naive, biol rep3, tech rep2 : CNhs14333 ctss	0	0	30.323	0
natural helper cells, naive, biol rep3, tech rep3 : CNhs14387 ctss	0	0	25.607	0
Neurons - cortical, donor1 : CNhs12025 ctss	0	1.244	231.539	1.555
Neurons - cortical, donor2 : CNhs11947 ctss	91.454	1.62	234.1	1.08
Neurons - cortical, donor3 : CNhs12112 ctss	84.244	0.631	259.962	0.631
Neurons - dorsal spinal cord, donor1 : CNhs12630 ctss	78.451	0	97.324	0
Neurons - dorsal spinal cord, donor2 : CNhs12635 ctss	0	0	232.52	0
Neurons - dorsal spinal cord, donor3 : CNhs12618 ctss	10.283	0	235.446	0.883
Neurons - hippocampal, donor1 : CNhs12133 ctss	11.043	0.612	225.383	0.98
Neurons - hippocampal, donor2 : CNhs12359 ctss	21.926	1.054	178.081	0.767
Neurons - hippocampal, donor3 : CNhs12110 ctss	19.744	0	166.379	0
Neurons - raphe, donor1 : CNhs12631 ctss	7.354	0	222.434	0
Neurons - raphe, donor2 : CNhs12636 ctss	0	0	243.244	1.788
Neurons - raphe, donor3 : CNhs12619 ctss	7.15	0	249.457	0.768
Neurons - spiral ganglion, pool1 : CNhs14147 ctss	8.756	0	0	0
Neurons - striatal, donor1 : CNhs12134 ctss	0	0.396	274.719	0.396
Neurons - striatal, donor2 : CNhs12360 ctss	12.397	0	262.844	1.189
Neurons - striatal, donor3 : CNhs12111 ctss	10.43	0	240.662	0
Neurons - substantia nigra, donor4, tech rep1 : CNhs12612 ctss	3.125	0	255.732	2.513
Neurons - substantia nigra, donor4, tech rep2 : CNhs12821 ctss	5.304	0	237.091	0.657
Neurons - substantia nigra, donor5 : CNhs12614 ctss	7.231	0	220.603	0
Neurons - substantia nigra, donor5, tech rep2 : CNhs12923 ctss	2.251	0	262.03	0
Neurons - substantia nigra, donor6 : CNhs12643 ctss	2.559	0.458	281.913	3.209
Neurons - ventral spinal cord, donor1 : CNhs12632 ctss	6.265	0	283.433	0
Neurons - ventral spinal cord, donor2 : CNhs12638 ctss	6.776	0.854	256.127	0.427
Neurons - ventral spinal cord, donor3 : CNhs12113 ctss	5.695	0.932	267.856	1.305
neurospheres - enteric neuron derived, biol rep1 : CNhs13087 ctss	2.61	0	151.128	0.947
neurospheres - enteric neuron derived, biol rep2 : CNhs13088 ctss	0	0	144.072	0
neurospheres - enteric neuron derived, biol rep3 : CNhs13089 ctss	0	2.37	155.536	0
neurospheres - parasympathetic neuron derived, biol rep1 : CNhs13084 ctss	0	0.717	156.047	0
neurospheres - parasympathetic neuron derived, biol rep2 : CNhs13085 ctss	0	0	158.187	0.668
neurospheres - parasympathetic neuron derived, biol rep3 : CNhs13086 ctss	0	0	162.486	1.132
neurospheres - sympathetic neuron derived, biol rep1 : CNhs13081 ctss	0	1.619	134.802	1.214
neurospheres - sympathetic neuron derived, biol rep2 : CNhs13082 ctss	0	0	158.987	0
neurospheres - sympathetic neuron derived, biol rep3 : CNhs13083 ctss	0	1.186	159.696	0
olfactory brain, adult : CNhs10489 ctss	0	21.207	180.261	0
osteoclast, bone marrow derived : CNhs14137 ctss	2.892	0	83.104	0
ovary, adult : CNhs10507 ctss	0	0.426	86.867	4.542
ovary, embryo E18 : CNhs11040 ctss	0	0	142.452	3.383
ovary, neonate N00 : CNhs11217 ctss	0	0	114.184	1.955
oviduct, adult pregnant day01 : CNhs10500 ctss	0.977	0.66	75.556	2.31
pancreas, adult : CNhs10486 ctss	0	0	46.461	3.982
pancreas, embryo E14 : CNhs11012 ctss	0	0	204.179	2.428
pancreas, embryo E15 : CNhs11042 ctss	4.127	0	158.72	5.442
pancreas, embryo E16 : CNhs11003 ctss	1.512	0	146.546	5.092
pancreas, embryo E17 : CNhs10599 ctss	0.566	0	124.027	5.02
pancreas, embryo E18 : CNhs10580 ctss	0	0	112.214	5.534
pancreas, neonate N00 : CNhs11105 ctss	0	0	99.236	3.876
pancreas, neonate N01 : CNhs11138 ctss	0	0	92.701	1.454
pancreas, neonate N02 : CNhs11139 ctss	0	0	100.532	4.991
pancreas, neonate N16 : CNhs11136 ctss	0	0	66.684	4.741
pancreas, neonate N25 : CNhs11094 ctss	0	0	45.33	3.163
pancreas, neonate N30 : CNhs11182 ctss	0	0	63.944	4.125
pituitary gland, adult : CNhs10493 ctss	0	1.362	122.558	1.021
pituitary gland, embryo E12 : CNhs11018 ctss	0	0	130.184	2.701
pituitary gland, embryo E13 : CNhs11009 ctss	2.161	0	160.405	2.717
pituitary gland, embryo E14 : CNhs11037 ctss	1.294	0	149.607	1.072
pituitary gland, embryo E15 : CNhs10592 ctss	0	0	128.749	1.951
pituitary gland, embryo E16 : CNhs11036 ctss	0	0	156.429	1.962
pituitary gland, embryo E17 : CNhs11039 ctss	0.535	0	156.815	1.975
pituitary gland, neonate N00 : CNhs11190 ctss	0	0	172.023	2.131
placenta, adult pregnant day10 : CNhs10472 ctss	0	5.163	317.041	2.347
placenta, adult pregnant day17 : CNhs10464 ctss	0.704	0	548.01	6.355
Pre-hematopoietic stem cell, aorta-gonad-mesonephros (AGM) region derived, embryo E9.5 : CNhs14149 ctss	14.193	0	91.781	0
prostate, adult : CNhs10470 ctss	0	0.662	90.417	12.35
SABiosciences XpressRef Mouse Universal Total RNA, pool1 : CNhs10611 ctss	1.323	0	52.386	1.685
Schwann, donor1 : CNhs12507 ctss	0.421	0	306.994	2.499
Schwann, donor2 : CNhs12573 ctss	0	0.453	290.497	1.285
Schwann, donor3 : CNhs12115 ctss	0	0	134.517	0
skin, adult : CNhs10492 ctss	0	2.144	35.615	1.649
skin, neonate N00 : CNhs11124 ctss	3.133	0	68.299	3.391
skin, neonate N03 : CNhs11215 ctss	10.334	0	88.238	2.232
skin, neonate N06 : CNhs11097 ctss	6.333	0	80.696	1.671
skin, neonate N10 : CNhs11108 ctss	2.626	0	60.076	1.149
small intestine, neonate N16 : CNhs11114 ctss	1.149	0	20.112	2.915
Sox2+ Supporting cells - organ of corti, pool1 : CNhs12532 ctss	0	0	144.365	1.268
spinal cord, adult : CNhs10505 ctss	15.211	0	250.51	1.669
spleen, adult : CNhs10465 ctss	11.496	0	34.345	1.88
spleen, embryo E16 : CNhs11035 ctss	0	0	114.132	1.445
spleen, embryo E18 : CNhs11011 ctss	0	0	82.412	1.111
spleen, neonate N10 : CNhs11116 ctss	0	0	33.53	1.695
spleen, neonate N20 : CNhs11112 ctss	0	0	22.144	1.777
spleen, neonate N25 : CNhs11099 ctss	0	0	25.623	2.974
ST2 (Mesenchymal stem cells) cells, differentiation to adipocytes, 00hr15min, biol rep1 (015mA1) : CNhs13114 ctss	0	2.651	163.045	0
ST2 (Mesenchymal stem cells) cells, differentiation to adipocytes, 00hr15min, biol rep2 (015mA2) : CNhs13243 ctss	0	0	190.85	0
ST2 (Mesenchymal stem cells) cells, differentiation to adipocytes, 00hr15min, biol rep3 (015mA3) : CNhs13292 ctss	0	0	136.347	0
ST2 (Mesenchymal stem cells) cells, differentiation to adipocytes, 00hr30min, biol rep1 (030mA1) : CNhs13115 ctss	0	0	123.84	0
ST2 (Mesenchymal stem cells) cells, differentiation to adipocytes, 00hr30min, biol rep2 (030mA2) : CNhs13244 ctss	0	2.259	191.749	0
ST2 (Mesenchymal stem cells) cells, differentiation to adipocytes, 00hr30min, biol rep3 (030mA3) : CNhs13293 ctss	0	1.934	147.988	0
ST2 (Mesenchymal stem cells) cells, differentiation to adipocytes, 01hr, biol rep1 (001hA1) : CNhs13116 ctss	0	2.759	145.323	0
ST2 (Mesenchymal stem cells) cells, differentiation to adipocytes, 01hr, biol rep2 (001hA2) : CNhs13245 ctss	0	3.792	180.488	0.758
ST2 (Mesenchymal stem cells) cells, differentiation to adipocytes, 01hr, biol rep3 (001hA3) : CNhs13295 ctss	0	4.554	170.216	0
ST2 (Mesenchymal stem cells) cells, differentiation to adipocytes, 02hr, biol rep1 (002hA1) : CNhs13117 ctss	0	0	140.522	0
ST2 (Mesenchymal stem cells) cells, differentiation to adipocytes, 02hr, biol rep2 (002hA2) : CNhs13247 ctss	0	1.744	204.48	0
ST2 (Mesenchymal stem cells) cells, differentiation to adipocytes, 02hr, biol rep3 (002hA3) : CNhs13296 ctss	0	2.779	148.652	0
ST2 (Mesenchymal stem cells) cells, differentiation to adipocytes, 03hr, biol rep1 (003hA1) : CNhs13118 ctss	0	1.456	157.258	0
ST2 (Mesenchymal stem cells) cells, differentiation to adipocytes, 03hr, biol rep2 (003hA2) : CNhs13248 ctss	0	6.854	180.758	0
ST2 (Mesenchymal stem cells) cells, differentiation to adipocytes, 03hr, biol rep3 (003hA3) : CNhs13297 ctss	0	5.033	152.807	0
ST2 (Mesenchymal stem cells) cells, differentiation to adipocytes, 06hr, biol rep1 (006hA1) : CNhs13120 ctss	0	0	119.037	0
ST2 (Mesenchymal stem cells) cells, differentiation to adipocytes, 06hr, biol rep2 (006hA2) : CNhs13249 ctss	0	7.503	130.236	0
ST2 (Mesenchymal stem cells) cells, differentiation to adipocytes, 06hr, biol rep3 (006hA3) : CNhs13298 ctss	0	4.256	103.218	0
ST2 (Mesenchymal stem cells) cells, differentiation to adipocytes, 12hr, biol rep1 (012hA1) : CNhs13121 ctss	0	0	166.956	1.149
ST2 (Mesenchymal stem cells) cells, differentiation to adipocytes, 12hr, biol rep2 (012hA2) : CNhs13250 ctss	0	4.254	165.197	1.063
ST2 (Mesenchymal stem cells) cells, differentiation to adipocytes, 12hr, biol rep3 (012hA3) : CNhs13299 ctss	0	4.704	141.708	0
ST2 (Mesenchymal stem cells) cells, differentiation to adipocytes, 18hr, biol rep1 (018hA1) : CNhs13122 ctss	0	0	145.735	0
ST2 (Mesenchymal stem cells) cells, differentiation to adipocytes, 18hr, biol rep2 (018hA2) : CNhs13251 ctss	0	1.478	177.642	2.069
ST2 (Mesenchymal stem cells) cells, differentiation to adipocytes, 18hr, biol rep3 (018hA3) : CNhs13300 ctss	0	4.279	147.612	0
ST2 (Mesenchymal stem cells) cells, differentiation to adipocytes, 24hr, biol rep1 (024hA1) : CNhs13123 ctss	0	0	89.344	0
ST2 (Mesenchymal stem cells) cells, differentiation to adipocytes, 24hr, biol rep2 (024hA2) : CNhs13252 ctss	0	5.557	177.562	0
ST2 (Mesenchymal stem cells) cells, differentiation to adipocytes, 24hr, biol rep3 (024hA3) : CNhs13301 ctss	0	4.65	124.379	1.744
ST2 (Mesenchymal stem cells) cells, differentiation to adipocytes, 36hr, biol rep1 (036hA1) : CNhs13124 ctss	0	0	87.069	0
ST2 (Mesenchymal stem cells) cells, differentiation to adipocytes, 36hr, biol rep2 (036hA2) : CNhs13253 ctss	0	1.465	155.838	0
ST2 (Mesenchymal stem cells) cells, differentiation to adipocytes, 36hr, biol rep3 (036hA3) : CNhs13302 ctss	0	1.78	120.424	0
ST2 (Mesenchymal stem cells) cells, differentiation to adipocytes, day02, biol rep1 (048hA1) : CNhs13125 ctss	0	0	135.68	0
ST2 (Mesenchymal stem cells) cells, differentiation to adipocytes, day02, biol rep2 (048hA2) : CNhs13254 ctss	0	4.291	155.493	1.767
ST2 (Mesenchymal stem cells) cells, differentiation to adipocytes, day02, biol rep3 (048hA3) : CNhs13303 ctss	0	0	138.278	0
ST2 (Mesenchymal stem cells) cells, differentiation to adipocytes, day03, biol rep1 (072hA1) : CNhs13126 ctss	0	3.245	185.603	0
ST2 (Mesenchymal stem cells) cells, differentiation to adipocytes, day03, biol rep2 (072hA2) : CNhs13255 ctss	0	1.309	161.435	0
ST2 (Mesenchymal stem cells) cells, differentiation to adipocytes, day03, biol rep3 (072hA3) : CNhs13304 ctss	0	3.206	130.805	0
ST2 (Mesenchymal stem cells) cells, differentiation to adipocytes, day04, biol rep1 (096hA1) : CNhs13127 ctss	0	0	135.047	0
ST2 (Mesenchymal stem cells) cells, differentiation to adipocytes, day04, biol rep2 (096hA2) : CNhs13256 ctss	0	4.97	194.769	1.657
ST2 (Mesenchymal stem cells) cells, differentiation to adipocytes, day04, biol rep3 (096hA3) : CNhs13305 ctss	0	2.359	177.835	2.83
ST2 (Mesenchymal stem cells) cells, differentiation to adipocytes, day05, biol rep1 (120hA1) : CNhs13128 ctss	0	3.278	148.352	0
ST2 (Mesenchymal stem cells) cells, differentiation to adipocytes, day05, biol rep2 (120hA2) : CNhs13257 ctss	0	3.117	187.03	0.85
ST2 (Mesenchymal stem cells) cells, differentiation to adipocytes, day05, biol rep3 (120hA3) : CNhs13306 ctss	0	3.409	155.094	0
ST2 (Mesenchymal stem cells) cells, differentiation to adipocytes, day06, biol rep1 (144hA1) : CNhs13129 ctss	0	0	129.497	0
ST2 (Mesenchymal stem cells) cells, differentiation to adipocytes, day06, biol rep2 (144hA2) : CNhs13258 ctss	0	1.955	164.492	0
ST2 (Mesenchymal stem cells) cells, differentiation to adipocytes, day06, biol rep3 (144hA3) : CNhs13307 ctss	0	0	139.801	0
ST2 (Mesenchymal stem cells) cells, differentiation to osteocytes, 00hr15min, biol rep1 (015mB1) : CNhs13130 ctss	0	2.896	152.785	0
ST2 (Mesenchymal stem cells) cells, differentiation to osteocytes, 00hr15min, biol rep2 (015mB2) : CNhs13259 ctss	0	2.982	185.159	0
ST2 (Mesenchymal stem cells) cells, differentiation to osteocytes, 00hr15min, biol rep3 (015mB3) : CNhs13308 ctss	0	2.661	155.012	0
ST2 (Mesenchymal stem cells) cells, differentiation to osteocytes, 00hr30min, biol rep1 (030mB1) : CNhs13131 ctss	0	0	135.436	0
ST2 (Mesenchymal stem cells) cells, differentiation to osteocytes, 00hr30min, biol rep2 (030mB2) : CNhs13260 ctss	0	4.752	191.744	0
ST2 (Mesenchymal stem cells) cells, differentiation to osteocytes, 00hr30min, biol rep3 (030mB3) : CNhs13309 ctss	0	8.422	163.292	0
ST2 (Mesenchymal stem cells) cells, differentiation to osteocytes, 01hr, biol rep1 (001hB1) : CNhs13132 ctss	0	3.265	133.849	0
ST2 (Mesenchymal stem cells) cells, differentiation to osteocytes, 01hr, biol rep2 (001hB2) : CNhs13261 ctss	0	2.46	184.518	0.615
ST2 (Mesenchymal stem cells) cells, differentiation to osteocytes, 01hr, biol rep3 (001hB3) : CNhs13310 ctss	0	0	139.24	0
ST2 (Mesenchymal stem cells) cells, differentiation to osteocytes, 02hr, biol rep1 (002hB1) : CNhs13133 ctss	0	1.876	158.837	0
ST2 (Mesenchymal stem cells) cells, differentiation to osteocytes, 02hr, biol rep2 (002hB2) : CNhs13262 ctss	0	3.666	191.472	0
ST2 (Mesenchymal stem cells) cells, differentiation to osteocytes, 02hr, biol rep3 (002hB3) : CNhs13311 ctss	0	0	176.855	0
ST2 (Mesenchymal stem cells) cells, differentiation to osteocytes, 03hr, biol rep1 (003hB1) : CNhs13134 ctss	0	3.49	186.722	0
ST2 (Mesenchymal stem cells) cells, differentiation to osteocytes, 03hr, biol rep2 (003hB2) : CNhs13263 ctss	0	2.062	181.081	0.825
ST2 (Mesenchymal stem cells) cells, differentiation to osteocytes, 03hr, biol rep3 (003hB3) : CNhs13312 ctss	0	4.523	162.83	0
ST2 (Mesenchymal stem cells) cells, differentiation to osteocytes, 06hr, biol rep1 (006hB1) : CNhs13135 ctss	0	2.881	148.664	0
ST2 (Mesenchymal stem cells) cells, differentiation to osteocytes, 06hr, biol rep2 (006hB2) : CNhs13264 ctss	0	2.763	191.724	0.638
ST2 (Mesenchymal stem cells) cells, differentiation to osteocytes, 06hr, biol rep3 (006hB3) : CNhs13313 ctss	0	4.133	142.289	0
ST2 (Mesenchymal stem cells) cells, differentiation to osteocytes, 12hr, biol rep1 (012hB1) : CNhs13136 ctss	0	0	172.166	0
ST2 (Mesenchymal stem cells) cells, differentiation to osteocytes, 12hr, biol rep2 (012hB2) : CNhs13265 ctss	0	1.563	192.658	0.67
ST2 (Mesenchymal stem cells) cells, differentiation to osteocytes, 12hr, biol rep3 (012hB3) : CNhs13314 ctss	0	0	172.899	1.742
ST2 (Mesenchymal stem cells) cells, differentiation to osteocytes, 18hr, biol rep1 (018hB1) : CNhs13137 ctss	0	1.834	158.293	0
ST2 (Mesenchymal stem cells) cells, differentiation to osteocytes, 18hr, biol rep2 (018hB2) : CNhs13266 ctss	0	1.536	201.982	1.28
ST2 (Mesenchymal stem cells) cells, differentiation to osteocytes, 18hr, biol rep3 (018hB3) : CNhs13315 ctss	0	0	191.968	1.114
ST2 (Mesenchymal stem cells) cells, differentiation to osteocytes, 24hr, biol rep1 (024hB1) : CNhs13138 ctss	0	2.326	151.963	0
ST2 (Mesenchymal stem cells) cells, differentiation to osteocytes, 24hr, biol rep2 (024hB2) : CNhs13267 ctss	0	1.286	181.982	0
ST2 (Mesenchymal stem cells) cells, differentiation to osteocytes, 24hr, biol rep3 (024hB3) : CNhs13316 ctss	0	3.097	193.738	1.376
ST2 (Mesenchymal stem cells) cells, differentiation to osteocytes, 36hr, biol rep1 (036hB1) : CNhs13139 ctss	0	0	174.969	0
ST2 (Mesenchymal stem cells) cells, differentiation to osteocytes, 36hr, biol rep2 (036hB2) : CNhs13268 ctss	0	3.039	202.376	0.608
ST2 (Mesenchymal stem cells) cells, differentiation to osteocytes, 36hr, biol rep3 (036hB3) : CNhs13317 ctss	0	2.316	200.783	0
ST2 (Mesenchymal stem cells) cells, differentiation to osteocytes, day02, biol rep1 (048hB1) : CNhs13140 ctss	0	0	191.582	0
ST2 (Mesenchymal stem cells) cells, differentiation to osteocytes, day02, biol rep2 (048hB2) : CNhs13269 ctss	0	0.907	176.378	0.907
ST2 (Mesenchymal stem cells) cells, differentiation to osteocytes, day02, biol rep3 (048hB3) : CNhs13319 ctss	0	1.769	171.571	0
ST2 (Mesenchymal stem cells) cells, differentiation to osteocytes, day03, biol rep1 (072hB1) : CNhs13141 ctss	0	2.348	193.91	0
ST2 (Mesenchymal stem cells) cells, differentiation to osteocytes, day03, biol rep2 (072hB2) : CNhs13271 ctss	0	1.403	190.447	0.601
ST2 (Mesenchymal stem cells) cells, differentiation to osteocytes, day03, biol rep3 (072hB3) : CNhs13320 ctss	0	1.579	172.85	0
ST2 (Mesenchymal stem cells) cells, differentiation to osteocytes, day04, biol rep1 (096hB1) : CNhs13142 ctss	0	1.534	156.514	0
ST2 (Mesenchymal stem cells) cells, differentiation to osteocytes, day04, biol rep2 (096hB2) : CNhs13272 ctss	0	0	169.003	0.792
ST2 (Mesenchymal stem cells) cells, differentiation to osteocytes, day04, biol rep3 (096hB3) : CNhs13321 ctss	0	2.431	181.868	0
ST2 (Mesenchymal stem cells) cells, differentiation to osteocytes, day05, biol rep1 (120hB1) : CNhs13144 ctss	0	1.942	152.236	0
ST2 (Mesenchymal stem cells) cells, differentiation to osteocytes, day05, biol rep2 (120hB2) : CNhs13273 ctss	0	0	167.46	0
ST2 (Mesenchymal stem cells) cells, differentiation to osteocytes, day05, biol rep3 (120hB3) : CNhs13322 ctss	0	0	104.63	0
ST2 (Mesenchymal stem cells) cells, differentiation to osteocytes, day06, biol rep1 (144hB1) : CNhs11940 ctss	0	2.302	185.212	0
ST2 (Mesenchymal stem cells) cells, differentiation to osteocytes, day06, biol rep2 (144hB2) : CNhs13274 ctss	0	0	170.173	0
ST2 (Mesenchymal stem cells) cells, differentiation to osteocytes, day06, biol rep3 (144hB3) : CNhs13323 ctss	0	0	161.86	1.935
ST2 (Mesenchymal stem cells) cells, medium change (without induction), 00hr, biol rep1 (000hC4) : CNhs11939 ctss	0	5.965	185.428	0.511
ST2 (Mesenchymal stem cells) cells, medium change (without induction), 00hr, biol rep2 (000hC5) : CNhs13275 ctss	0	2.858	166.523	0.779
ST2 (Mesenchymal stem cells) cells, medium change (without induction), 00hr, biol rep3 (000hC6) : CNhs13324 ctss	0	5.3	186.21	1.06
ST2 (Mesenchymal stem cells) cells, medium change (without induction), day06, biol rep1 (144hC1) : CNhs14197 ctss	0	0	161.525	0
ST2 (Mesenchymal stem cells) cells, medium change (without induction), day06, biol rep2 (144hC2) : CNhs14198 ctss	0	1.926	174.992	0
ST2 (Mesenchymal stem cells) cells, medium change (without induction), day06, biol rep3 (144hC3) : CNhs14199 ctss	0	1.016	206.655	0
stem cell (cKit+ Sca1- lineage-) KSL, biol rep1 : CNhs12534 ctss	0	0	97.568	0
stem cell (cKit+ Sca1- lineage-) KSL, biol rep2 : CNhs12535 ctss	0	0	102.444	0.98
stem cell (cKit+ Sca1- lineage-) KSL, biol rep3 : CNhs12536 ctss	0	0	94.391	0
stomach, adult : CNhs10503 ctss	0	0	20.048	0
stomach, embryo E12 : CNhs10588 ctss	0	0	132.387	1.265
stomach, embryo E15 : CNhs10603 ctss	0	0	104.303	1.627
stomach, embryo E16 : CNhs11022 ctss	0	0	96.557	3.24
stomach, embryo E17 : CNhs11006 ctss	0.648	0	79.872	0.627
stomach, embryo E18 : CNhs10999 ctss	0.836	0	73.37	3.931
stomach, neonate N03 : CNhs11193 ctss	2.184	0	105.194	3.776
stomach, neonate N07 : CNhs11210 ctss	3.506	0.331	96.87	3.885
stomach, neonate N25 : CNhs11104 ctss	1.901	0	56.016	4.188
stomach, neonate N30 : CNhs11134 ctss	2.618	0	20.22	3.888
submandibular gland, adult : CNhs10469 ctss	0	0	27.96	3.728
testis, adult : CNhs10504 ctss	0	0	338.216	12.965
testis, embryo E13 : CNhs11031 ctss	0	0	115.576	1.794
testis, embryo E15 : CNhs11034 ctss	0	0	110.692	2.647
testis, embryo E16 : CNhs11033 ctss	0	0	100.337	2.139
testis, embryo E17 : CNhs11029 ctss	0	0	127.481	3.746
testis, embryo E18 : CNhs11027 ctss	0	0	116.918	2.872
testis, neonate N00 : CNhs11189 ctss	0	0	104.917	2.112
testis, neonate N07 : CNhs11222 ctss	0	0	88.799	1.823
testis, neonate N10 : CNhs11204 ctss	0.391	0	104.125	4.194
testis, neonate N20 : CNhs11110 ctss	0	0	157.03	7.489
testis, neonate N30 : CNhs11130 ctss	0	0	207.958	7.201
thymus, adult : CNhs10471 ctss	0	0	77.739	0.948
thymus, embryo E14 : CNhs11041 ctss	0	0	144.543	1.216
thymus, embryo E15 : CNhs11005 ctss	0	0	149.136	1.849
thymus, embryo E16 : CNhs11002 ctss	0	0	137.196	2.209
thymus, embryo E17 : CNhs10581 ctss	0	0	108.49	2.864
thymus, embryo E18 : CNhs10595 ctss	0	0	86.426	2.185
thymus, neonate N02 : CNhs11181 ctss	0	0	112.503	2.524
thymus, neonate N03 : CNhs11137 ctss	0	0	105.303	2.658
thymus, neonate N06 : CNhs11197 ctss	0	0	100.26	4.342
thymus, neonate N07 : CNhs11211 ctss	0	0	110.652	4.42
thymus, neonate N10 : CNhs11194 ctss	0	0	111.211	3.428
thymus, neonate N20 : CNhs11186 ctss	0	0	111.687	4.093
thymus, neonate N25 : CNhs11125 ctss	0	0	99.483	4.714
thymus, neonate N30 : CNhs11132 ctss	0	0	100.514	4.324
tongue, adult : CNhs10499 ctss	0	0	40.811	6.802
Tracheal epithelial cells, differentiation to ciliated epithelial cells, 000hr, biol rep1 : CNhs13739 ctss	20.179	0	169.945	1.732
Tracheal epithelial cells, differentiation to ciliated epithelial cells, 000hr, biol rep2 : CNhs13740 ctss	31.608	0	150.749	0
Tracheal epithelial cells, differentiation to ciliated epithelial cells, 000hr, biol rep3 : CNhs13741 ctss	26.856	0	142.052	0
Tracheal epithelial cells, differentiation to ciliated epithelial cells, 004hr, biol rep1 : CNhs13742 ctss	24.265	0	195.454	1.664
Tracheal epithelial cells, differentiation to ciliated epithelial cells, 004hr, biol rep2 : CNhs13743 ctss	35.429	0	184.51	2.389
Tracheal epithelial cells, differentiation to ciliated epithelial cells, 004hr, biol rep3 : CNhs13744 ctss	42.084	0	175.977	2.937
Tracheal epithelial cells, differentiation to ciliated epithelial cells, 008hr, biol rep1 : CNhs13745 ctss	40.436	0	200.908	2.507
Tracheal epithelial cells, differentiation to ciliated epithelial cells, 008hr, biol rep2 : CNhs13746 ctss	46.66	0	193.954	1.828
Tracheal epithelial cells, differentiation to ciliated epithelial cells, 008hr, biol rep3 : CNhs13747 ctss	38.891	0	201.369	2.655
Tracheal epithelial cells, differentiation to ciliated epithelial cells, 012hr, biol rep1 : CNhs13696 ctss	40.956	0	331.261	1.301
Tracheal epithelial cells, differentiation to ciliated epithelial cells, 012hr, biol rep2 : CNhs13748 ctss	45.96	0	254.966	1.772
Tracheal epithelial cells, differentiation to ciliated epithelial cells, 012hr, biol rep3 : CNhs13749 ctss	53.509	0	217.533	0
Tracheal epithelial cells, differentiation to ciliated epithelial cells, 016hr, biol rep1 : CNhs13750 ctss	35.964	0	232.486	2.283
Tracheal epithelial cells, differentiation to ciliated epithelial cells, 016hr, biol rep2 : CNhs13751 ctss	43.384	0	244.818	3.649
Tracheal epithelial cells, differentiation to ciliated epithelial cells, 016hr, biol rep3 : CNhs13752 ctss	37.486	0	238	4.813
Tracheal epithelial cells, differentiation to ciliated epithelial cells, 020hr, biol rep1 : CNhs13697 ctss	48.848	0	293.626	2.191
Tracheal epithelial cells, differentiation to ciliated epithelial cells, 020hr, biol rep2 : CNhs13753 ctss	45.233	0	230.711	5.607
Tracheal epithelial cells, differentiation to ciliated epithelial cells, 020hr, biol rep3 : CNhs13754 ctss	53.266	0	209.563	5.226
Tracheal epithelial cells, differentiation to ciliated epithelial cells, 024hr, biol rep1 : CNhs13755 ctss	50.17	0	263.114	3.388
Tracheal epithelial cells, differentiation to ciliated epithelial cells, 024hr, biol rep2 : CNhs13756 ctss	58.79	0	263.214	4.62
Tracheal epithelial cells, differentiation to ciliated epithelial cells, 024hr, biol rep3 : CNhs13757 ctss	64.533	0	237.876	4.836
Tracheal epithelial cells, differentiation to ciliated epithelial cells, 030hr, biol rep1 : CNhs13758 ctss	46.245	0	281.346	2.802
Tracheal epithelial cells, differentiation to ciliated epithelial cells, 030hr, biol rep2 : CNhs13759 ctss	49.6	0	307.209	2.31
Tracheal epithelial cells, differentiation to ciliated epithelial cells, 030hr, biol rep3 : CNhs13760 ctss	83.574	0	286.951	5.141
Tracheal epithelial cells, differentiation to ciliated epithelial cells, 036hr, biol rep1 : CNhs13762 ctss	54.305	0	239.046	6.47
Tracheal epithelial cells, differentiation to ciliated epithelial cells, 036hr, biol rep2 : CNhs13763 ctss	58.91	0	234.93	2.085
Tracheal epithelial cells, differentiation to ciliated epithelial cells, 036hr, biol rep3 : CNhs13764 ctss	61.86	0	245.523	3.908
Tracheal epithelial cells, differentiation to ciliated epithelial cells, 042hr, biol rep1 : CNhs13765 ctss	67.818	0	268.617	0
Tracheal epithelial cells, differentiation to ciliated epithelial cells, 042hr, biol rep2 : CNhs13766 ctss	51.404	0	213.99	0
Tracheal epithelial cells, differentiation to ciliated epithelial cells, 042hr, biol rep3 : CNhs13767 ctss	26.749	0	287.848	1.657
Tracheal epithelial cells, differentiation to ciliated epithelial cells, 048hr, biol rep1 : CNhs13768 ctss	73.619	0	249.53	5.776
Tracheal epithelial cells, differentiation to ciliated epithelial cells, 048hr, biol rep2 : CNhs13769 ctss	62.217	0	282.654	3.375
Tracheal epithelial cells, differentiation to ciliated epithelial cells, 048hr, biol rep3 : CNhs13770 ctss	72.393	0	283.714	5.196
Tracheal epithelial cells, differentiation to ciliated epithelial cells, 054hr, biol rep1 : CNhs13771 ctss	80.715	0	204.817	3.382
Tracheal epithelial cells, differentiation to ciliated epithelial cells, 054hr, biol rep2 : CNhs13772 ctss	38.681	0	237.057	2.983
Tracheal epithelial cells, differentiation to ciliated epithelial cells, 054hr, biol rep3 : CNhs13773 ctss	45.438	0	188.002	1.486
Tracheal epithelial cells, differentiation to ciliated epithelial cells, 060hr, biol rep1 : CNhs13774 ctss	40.127	0	177.884	0
Tracheal epithelial cells, differentiation to ciliated epithelial cells, 060hr, biol rep2 : CNhs13775 ctss	30.699	0	256.692	1.287
Tracheal epithelial cells, differentiation to ciliated epithelial cells, 060hr, biol rep3 : CNhs13776 ctss	36.992	0	221.099	0.959
Tracheal epithelial cells, differentiation to ciliated epithelial cells, 066hr, biol rep1 : CNhs13777 ctss	48.246	0	248.134	7.598
Tracheal epithelial cells, differentiation to ciliated epithelial cells, 066hr, biol rep2 : CNhs13778 ctss	34.791	0	214.698	5.045
Tracheal epithelial cells, differentiation to ciliated epithelial cells, 066hr, biol rep3 : CNhs13779 ctss	33.698	0	221.572	9.099
Tracheal epithelial cells, differentiation to ciliated epithelial cells, 072hr, biol rep1 : CNhs13780 ctss	23.659	2.29	269.038	1.526
Tracheal epithelial cells, differentiation to ciliated epithelial cells, 072hr, biol rep2 : CNhs13781 ctss	73.27	0	270.979	1.792
Tracheal epithelial cells, differentiation to ciliated epithelial cells, 072hr, biol rep3 : CNhs13782 ctss	49.269	0	194.526	5.379
Tracheal epithelial cells, differentiation to ciliated epithelial cells, 084hr, biol rep1 : CNhs13783 ctss	61.256	1.015	211.09	1.015
Tracheal epithelial cells, differentiation to ciliated epithelial cells, 084hr, biol rep2 : CNhs13784 ctss	34.167	0	218.729	4.925
Tracheal epithelial cells, differentiation to ciliated epithelial cells, 084hr, biol rep3 : CNhs13786 ctss	31.868	0	221.071	9.4
Tracheal epithelial cells, differentiation to ciliated epithelial cells, 096hr, biol rep1 : CNhs13787 ctss	35.657	0	262.175	1.785
Tracheal epithelial cells, differentiation to ciliated epithelial cells, 096hr, biol rep2 : CNhs13788 ctss	43.356	0	227.564	5.928
Tracheal epithelial cells, differentiation to ciliated epithelial cells, 096hr, biol rep3 : CNhs13789 ctss	37.872	0	213.282	1.981
Tracheal epithelial cells, differentiation to ciliated epithelial cells, 120hr, biol rep1 : CNhs13790 ctss	31.035	0	233.857	7.342
Tracheal epithelial cells, differentiation to ciliated epithelial cells, 120hr, biol rep2 : CNhs13791 ctss	26.066	0	245.564	11.998
Tracheal epithelial cells, differentiation to ciliated epithelial cells, 120hr, biol rep3 : CNhs13792 ctss	32.123	0	235.174	8.071
trophoblast stem cell line B1 differentiation, day00, biol rep1 : CNhs13526 ctss	38.852	0	435.092	1.332
trophoblast stem cell line B1 differentiation, day01, biol rep1 : CNhs13527 ctss	37.072	0	567.789	0
trophoblast stem cell line B1 differentiation, day02, biol rep1 : CNhs13528 ctss	17.69	0	565.903	0
trophoblast stem cell line B1 differentiation, day03, biol rep1 : CNhs13529 ctss	18.117	0	598.68	0
trophoblast stem cell line B1 differentiation, day04, biol rep1 : CNhs13635 ctss	14.508	0	368.089	0.793
trophoblast stem cell line B1 differentiation, day05, biol rep1 : CNhs13636 ctss	0.793	0	784.425	0.912
trophoblast stem cell line B1 differentiation, day06, biol rep1 : CNhs13530 ctss	7.753	0	790.173	2.702
trophoblast stem cell line R1AB differentiation, day00, biol rep1 : CNhs13481 ctss	10.229	0	220.158	0.538
trophoblast stem cell line R1AB differentiation, day01, biol rep1 : CNhs13514 ctss	71.233	0	303.088	0
trophoblast stem cell line R1AB differentiation, day02, biol rep1 : CNhs13515 ctss	37.089	0	368.294	1.233
trophoblast stem cell line R1AB differentiation, day03, biol rep1 : CNhs13516 ctss	12.505	0	362.701	1.183
trophoblast stem cell line R1AB differentiation, day04, biol rep1 : CNhs13517 ctss	5.07	0	271.592	1.199
trophoblast stem cell line R1AB differentiation, day05, biol rep1 : CNhs13518 ctss	0.6	0	353.747	0
trophoblast stem cell line R1AB differentiation, day06, biol rep1 : CNhs13482 ctss	1.41	0	400.346	0
trophoblast stem cell line Rybp differentiation, day00, biol rep1 : CNhs13519 ctss	0.39	0	447.245	1.007
trophoblast stem cell line Rybp differentiation, day01, biol rep1 : CNhs13520 ctss	22.161	0	628.822	0
trophoblast stem cell line Rybp differentiation, day02, biol rep1 : CNhs13521 ctss	7.5	0	653.346	1.479
trophoblast stem cell line Rybp differentiation, day03, biol rep1 : CNhs13522 ctss	5.915	0	716.23	0
trophoblast stem cell line Rybp differentiation, day04, biol rep1 : CNhs13523 ctss	3.276	0	754.433	1.985
trophoblast stem cell line Rybp differentiation, day05, biol rep1 : CNhs13524 ctss	1.191	0	757.789	1.267
trophoblast stem cell line Rybp differentiation, day06, biol rep1 : CNhs13525 ctss	1.478	0	762.06	3.321
TSt-4/DLL1 feeder cells, biol rep1 : CNhs13407 ctss	2.699	0	148.859	0
TSt-4/DLL1 feeder cells, biol rep2 : CNhs13408 ctss	0	0	104.47	0
TSt-4/DLL1 feeder cells, biol rep3 : CNhs13409 ctss	0	0	78.217	0
unclassified : CNhs12510 ctss	0	0	0	0
unclassified : CNhs12511 ctss	0	0	0	0
unclassified : CNhs12512 ctss	0	0	0	0
unclassified : CNhs12513 ctss	0	0	0	0
unclassified : CNhs12514 ctss	0	0	0	0
Universal RNA - Mouse Normal Tissues Biochain, pool1 : CNhs10613 ctss	0	0	53.552	0.571
urinary bladder, adult : CNhs10481 ctss	0.457	0	103.936	1.932
uterus, adult : CNhs10509 ctss	1.546	0	71.612	1.832
uterus, adult pregnant day19 : CNhs10497 ctss	2.198	1.877	88.398	2.252
vagina, adult : CNhs10502 ctss	0	0	56.808	2.358
vesicular gland, adult : CNhs10491 ctss	9.861	0	84.264	8.025
visual cortex - Mecp knockout, neonate N15, donor1 : CNhs13040 ctss	2.006	0	170.467	0
visual cortex - Mecp knockout, neonate N15, donor2 : CNhs13041 ctss	2.841	0	154.988	0
visual cortex - Mecp knockout, neonate N15, donor3 : CNhs13821 ctss	0	3.65	358.268	1.095
visual cortex - Mecp knockout, neonate N30, donor1 : CNhs13042 ctss	2.19	0	164.816	0
visual cortex - Mecp knockout, neonate N30, donor2 : CNhs13043 ctss	0	0	147.326	0
visual cortex - Mecp knockout, neonate N30, donor3 : CNhs13044 ctss	2.511	2.139	173.665	1.283
visual cortex - Mecp knockout, neonate N60-70, donor1 : CNhs13045 ctss	0	0	146.674	0
visual cortex - Mecp knockout, neonate N60-70, donor2 : CNhs13046 ctss	0	5.069	209.505	2.365
visual cortex - Mecp knockout, neonate N60-70, donor3 : CNhs13048 ctss	0	2.333	176.381	0
visual cortex - wildtype, neonate N15, donor1 : CNhs13031 ctss	0	0	197.663	0
visual cortex - wildtype, neonate N15, donor2 : CNhs13032 ctss	0	0	181.368	1.381
visual cortex - wildtype, neonate N15, donor3 : CNhs13033 ctss	0	0	197.649	0
visual cortex - wildtype, neonate N15, donor5 : CNhs13820 ctss	0	1.719	325.834	0.516
visual cortex - wildtype, neonate N30, donor1 : CNhs13034 ctss	0.516	0	173.326	0
visual cortex - wildtype, neonate N30, donor2 : CNhs13035 ctss	2.055	0	142.014	0
visual cortex - wildtype, neonate N30, donor3 : CNhs13036 ctss	0	0	181.581	2.7
visual cortex - wildtype, neonate N60-70, donor1 : CNhs13037 ctss	0	0	190.036	1.351
visual cortex - wildtype, neonate N60-70, donor2 : CNhs13038 ctss	3.603	0	167.663	2.266
visual cortex - wildtype, neonate N60-70, donor3 : CNhs13039 ctss	0	4.142	177.074	0
whole body, embryo E11 : CNhs11014 ctss	0	0	171.56	1.142
whole body, embryo E12 : CNhs10587 ctss	6.123	0	129.284	0
whole body, embryo E13 : CNhs10512 ctss	1.596	0	147.855	2.732
whole body, embryo E14 : CNhs10519 ctss	3.073	0	118.641	0.629
whole body, embryo E14.5 : CNhs10578 ctss	0	0.729	95.541	0.729
whole body, embryo E16 : CNhs10514 ctss	0	0	94.679	1.655
whole body, embryo E17 : CNhs10517 ctss	1.655	0	163.126	1.499
whole body, embryo E17.5 : CNhs10513 ctss	8.494	0.772	88.737	0.965
whole body, embryo E17.5, pool1 (internal control) : CNhs10479 ctss	2.894	0	0	0
whole body, embryo E17.5, pool1 (internal control) : CNhs10495 ctss	0	0	0	0
whole body, embryo E17.5, pool1 (internal control) : CNhs10511 ctss	0	0	0	0
whole body, embryo E17.5, pool1 (internal control) : CNhs10527 ctss	0	0	0	0
whole body, embryo E17.5, pool1 (internal control) : CNhs10591 ctss	0	0	0	0
whole body, embryo E17.5, pool1 (internal control) : CNhs10607 ctss	0	0	0	0
whole body, embryo E17.5, pool1 (internal control) : CNhs10623 ctss	0	0	0	0
whole body, embryo E17.5, pool1 (internal control) : CNhs10639 ctss	0	0	0	0
whole body, embryo E17.5, pool1 (internal control) : CNhs10655 ctss	0	0	0	0
whole body, embryo E17.5, pool1 (internal control) : CNhs10725 ctss	0	0	0	0
whole body, embryo E17.5, pool1 (internal control) : CNhs10749 ctss	0	0	0	0
whole body, embryo E17.5, pool1 (internal control) : CNhs10840 ctss	0	0	0	0
whole body, embryo E17.5, pool1 (internal control) : CNhs10856 ctss	0	0	0	0
whole body, embryo E17.5, pool1 (internal control) : CNhs10880 ctss	0	0	0	0
whole body, embryo E17.5, pool1 (internal control) : CNhs11000 ctss	0	0	0	0
whole body, embryo E17.5, pool1 (internal control) : CNhs11024 ctss	0	0	0	0
whole body, embryo E17.5, pool1 (internal control) : CNhs11032 ctss	0	0	0	0
whole body, embryo E17.5, pool1 (internal control) : CNhs11048 ctss	0	0	0	0
whole body, embryo E17.5, pool1 (internal control) : CNhs11072 ctss	0	0	0	0
whole body, embryo E17.5, pool1 (internal control) : CNhs11080 ctss	0	0	0	0
whole body, embryo E17.5, pool1 (internal control) : CNhs11096 ctss	0	0	0	0
whole body, embryo E17.5, pool1 (internal control) : CNhs11120 ctss	0	0	0	0
whole body, embryo E17.5, pool1 (internal control) : CNhs11128 ctss	0	0	0	0
whole body, embryo E17.5, pool1 (internal control) : CNhs11184 ctss	0	0	0	0
whole body, embryo E17.5, pool1 (internal control) : CNhs11208 ctss	0	0	0	0
whole body, embryo E17.5, pool1 (internal control) : CNhs11216 ctss	0	0	0	0
whole body, embryo E17.5, pool1 (internal control) : CNhs11246 ctss	0	0	0	0
whole body, embryo E17.5, pool1 (internal control) : CNhs11262 ctss	0	0	0	0
whole body, embryo E17.5, pool1 (internal control) : CNhs11278 ctss	0	0	0	0
whole body, embryo E17.5, pool1 (internal control) : CNhs11294 ctss	0	0	0	0
whole body, embryo E17.5, pool1 (internal control) : CNhs11318 ctss	0	0	0	0
whole body, embryo E17.5, pool1 (internal control) : CNhs11326 ctss	0	0	0	0
whole body, embryo E17.5, pool1 (internal control) : CNhs11342 ctss	0	0	0	0
whole body, embryo E17.5, pool1 (internal control) : CNhs11374 ctss	0	0	0	0
whole body, embryo E17.5, pool1 (internal control) : CNhs11668 ctss	0	0	0	0
whole body, embryo E17.5, pool1 (internal control) : CNhs11706 ctss	0	0	0	0
whole body, embryo E17.5, pool1 (internal control) : CNhs11730 ctss	0	0	0	0
whole body, embryo E17.5, pool1 (internal control) : CNhs11754 ctss	0	0	0	0
whole body, embryo E17.5, pool1 (internal control) : CNhs11778 ctss	0	0	0	0
whole body, embryo E17.5, pool1 (internal control) : CNhs11802 ctss	0	0	0	0
whole body, embryo E17.5, pool1 (internal control) : CNhs11826 ctss	0	0	0	0
whole body, embryo E17.5, pool1 (internal control) : CNhs11850 ctss	0	0	0	0
whole body, embryo E17.5, pool1 (internal control) : CNhs11874 ctss	0	0	0	0
whole body, embryo E17.5, pool1 (internal control) : CNhs11898 ctss	0	0	0	0
whole body, embryo E17.5, pool1 (internal control) : CNhs11916 ctss	0	0	0	0
whole body, embryo E17.5, pool1 (internal control) : CNhs11938 ctss	0	0	0	0
whole body, embryo E17.5, pool1 (internal control) : CNhs11946 ctss	0	0	0	0
whole body, embryo E17.5, pool1 (internal control) : CNhs11970 ctss	0	0	0	0
whole body, embryo E17.5, pool1 (internal control) : CNhs11994 ctss	0	0	0	0
whole body, embryo E17.5, pool1 (internal control) : CNhs12018 ctss	0	0	0	0
whole body, embryo E17.5, pool1 (internal control) : CNhs12042 ctss	0	0	0	0
whole body, embryo E17.5, pool1 (internal control) : CNhs12066 ctss	0	0	0	0
whole body, embryo E17.5, pool1 (internal control) : CNhs12090 ctss	0	0	0	0
whole body, embryo E17.5, pool1 (internal control) : CNhs12114 ctss	0	0	0	0
whole body, embryo E17.5, pool1 (internal control) : CNhs12186 ctss	0	0	0	0
whole body, embryo E17.5, pool1 (internal control) : CNhs12194 ctss	0	0	0	0
whole body, embryo E17.5, pool1 (internal control) : CNhs12230 ctss	0	0	0	0
whole body, embryo E17.5, pool1 (internal control) : CNhs12313 ctss	0	0	0	0
whole body, embryo E17.5, pool1 (internal control) : CNhs12337 ctss	0	0	0	0
whole body, embryo E17.5, pool1 (internal control) : CNhs12361 ctss	0	0	0	0
whole body, embryo E17.5, pool1 (internal control) : CNhs12385 ctss	0	0	0	0
whole body, embryo E17.5, pool1 (internal control) : CNhs12409 ctss	0	0	0	0
whole body, embryo E17.5, pool1 (internal control) : CNhs12433 ctss	0	0	0	0
whole body, embryo E17.5, pool1 (internal control) : CNhs12457 ctss	0	0	0	0
whole body, embryo E17.5, pool1 (internal control) : CNhs12481 ctss	0	0	0	0
whole body, embryo E17.5, pool1 (internal control) : CNhs12505 ctss	0	0	0	0
whole body, embryo E17.5, pool1 (internal control) : CNhs12521 ctss	0	0	0	0
whole body, embryo E17.5, pool1 (internal control) : CNhs12537 ctss	0	0	0	0
whole body, embryo E17.5, pool1 (internal control) : CNhs12561 ctss	0	0	0	0
whole body, embryo E17.5, pool1 (internal control) : CNhs12577 ctss	0	0	0	0
whole body, embryo E17.5, pool1 (internal control) : CNhs12585 ctss	0	0	0	0
whole body, embryo E17.5, pool1 (internal control) : CNhs12613 ctss	0	0	0	0
whole body, embryo E17.5, pool1 (internal control) : CNhs12637 ctss	0	0	0	0
whole body, embryo E17.5, pool1 (internal control) : CNhs12661 ctss	0	0	0	0
whole body, embryo E17.5, pool1 (internal control) : CNhs12685 ctss	0	0	0	0
whole body, embryo E17.5, pool1 (internal control) : CNhs12729 ctss	0	0	0	0
whole body, embryo E17.5, pool1 (internal control) : CNhs12745 ctss	0	0	0	0
whole body, embryo E17.5, pool1 (internal control) : CNhs12769 ctss	0	0	0	0
whole body, embryo E17.5, pool1 (internal control) : CNhs12793 ctss	0	0	0	0
whole body, embryo E17.5, pool1 (internal control) : CNhs12817 ctss	0	0	0	0
whole body, embryo E17.5, pool1 (internal control) : CNhs12841 ctss	0	0	0	0
whole body, embryo E17.5, pool1 (internal control) : CNhs12865 ctss	0	0	0	0
whole body, embryo E17.5, pool1 (internal control) : CNhs12889 ctss	0	0	0	0
whole body, embryo E17.5, pool1 (internal control) : CNhs12913 ctss	0	0	0	0
whole body, embryo E17.5, pool1 (internal control) : CNhs12959 ctss	0	0	0	0
whole body, embryo E17.5, pool1 (internal control) : CNhs12983 ctss	0	0	0	0
whole body, embryo E17.5, pool1 (internal control) : CNhs12999 ctss	0	0	0	0
whole body, embryo E17.5, pool1 (internal control) : CNhs13023 ctss	0	0	0	0
whole body, embryo E17.5, pool1 (internal control) : CNhs13047 ctss	0	0	0	0
whole body, embryo E17.5, pool1 (internal control) : CNhs13071 ctss	0	0	0	0
whole body, embryo E17.5, pool1 (internal control) : CNhs13095 ctss	0	0	0	0
whole body, embryo E17.5, pool1 (internal control) : CNhs13119 ctss	0	0	0	0
whole body, embryo E17.5, pool1 (internal control) : CNhs13143 ctss	0	0	0	0
whole body, embryo E17.5, pool1 (internal control) : CNhs13167 ctss	0	0	0	0
whole body, embryo E17.5, pool1 (internal control) : CNhs13198 ctss	0	0	0	0
whole body, embryo E17.5, pool1 (internal control) : CNhs13222 ctss	0	0	0	0
whole body, embryo E17.5, pool1 (internal control) : CNhs13230 ctss	0	0	0	0
whole body, embryo E17.5, pool1 (internal control) : CNhs13246 ctss	0	0	0	0
whole body, embryo E17.5, pool1 (internal control) : CNhs13270 ctss	0	0	0	0
whole body, embryo E17.5, pool1 (internal control) : CNhs13294 ctss	0	0	0	0
whole body, embryo E17.5, pool1 (internal control) : CNhs13318 ctss	0	0	0	0
whole body, embryo E17.5, pool1 (internal control) : CNhs13342 ctss	0	0	0	0
whole body, embryo E17.5, pool1 (internal control) : CNhs13366 ctss	0	0	0	0
whole body, embryo E17.5, pool1 (internal control) : CNhs13390 ctss	0	0	0	0
whole body, embryo E17.5, pool1 (internal control) : CNhs13414 ctss	0	0	0	0
whole body, embryo E17.5, pool1 (internal control) : CNhs13438 ctss	0	0	0	0
whole body, embryo E17.5, pool1 (internal control) : CNhs13462 ctss	0	0	0	0
whole body, embryo E17.5, pool1 (internal control) : CNhs13486 ctss	0	0	0	0
whole body, embryo E17.5, pool1 (internal control) : CNhs13510 ctss	0	0	0	0
whole body, embryo E17.5, pool1 (internal control) : CNhs13534 ctss	0	0	0	0
whole body, embryo E17.5, pool1 (internal control) : CNhs13558 ctss	0	0	0	0
whole body, embryo E17.5, pool1 (internal control) : CNhs13570 ctss	0	0	0	0
whole body, embryo E17.5, pool1 (internal control) : CNhs13594 ctss	0	0	0	0
whole body, embryo E17.5, pool1 (internal control) : CNhs13618 ctss	0	0	0	0
whole body, embryo E17.5, pool1 (internal control) : CNhs13642 ctss	0	0	0	0
whole body, embryo E17.5, pool1 (internal control) : CNhs13685 ctss	0	0	0	0
whole body, embryo E17.5, pool1 (internal control) : CNhs13713 ctss	0	0	0	0
whole body, embryo E17.5, pool1 (internal control) : CNhs13737 ctss	0	0	0	0
whole body, embryo E17.5, pool1 (internal control) : CNhs13761 ctss	0	0	0	0
whole body, embryo E17.5, pool1 (internal control) : CNhs13785 ctss	0	0	0	0
whole body, embryo E17.5, pool1 (internal control) : CNhs13810 ctss	0	0	0	0
whole body, embryo E17.5, pool1 (internal control) : CNhs13834 ctss	0	0	0	0
whole body, embryo E17.5, pool1 (internal control) : CNhs13923 ctss	0	0	0	0
whole body, embryo E17.5, pool1 (internal control) : CNhs13928 ctss	0	0	0	0
whole body, embryo E17.5, pool1 (internal control) : CNhs13929 ctss	0	0	0	0
whole body, embryo E17.5, pool1 (internal control) : CNhs13930 ctss	0	0	0	0
whole body, embryo E17.5, pool1 (internal control) : CNhs13931 ctss	0	0	0	0
whole body, embryo E17.5, pool1 (internal control) : CNhs13932 ctss	0	0	0	0
whole body, embryo E17.5, pool1 (internal control) : CNhs13933 ctss	0	0	0	0
whole body, embryo E17.5, pool1 (internal control) : CNhs13934 ctss	0	0	0	0
whole body, embryo E17.5, pool1 (internal control) : CNhs13935 ctss	0	0	0	0
whole body, embryo E17.5, pool1 (internal control) : CNhs13967 ctss	0	0	0	0
whole body, embryo E17.5, pool1 (internal control) : CNhs14048 ctss	0	0	0	0
whole body, embryo E17.5, pool1 (internal control) : CNhs14072 ctss	0	0	0	0
whole body, embryo E17.5, pool1 (internal control) : CNhs14096 ctss	0	0	0	0
whole body, embryo E17.5, pool1 (internal control) : CNhs14120 ctss	0	0	0	0
whole body, embryo E17.5, pool1 (internal control) : CNhs14145 ctss	0	0	0	0
whole body, embryo E17.5, pool1 (internal control) : CNhs14161 ctss	0	0	0	0
whole body, embryo E17.5, pool1 (internal control) : CNhs14185 ctss	0	0	0	0
whole body, embryo E17.5, pool1 (internal control) : CNhs14209 ctss	0	0	0	0
whole body, embryo E17.5, pool1 (internal control) : CNhs14372 ctss	0	0	0	0
whole body, embryo E17.5, pool1 (internal control) : CNhs14373 ctss	0	0	0	0
whole body, embryo E17.5, pool1 (internal control) : CNhs14377 ctss	0	0	0	0
whole body, embryo E17.5, pool1 (internal control) : CNhs14401 ctss	0	0	0	0
whole body, embryo E17.5, pool1 (internal control) : CNhs14409 ctss	0	0	0	0
whole body, embryo E17.5, pool1 (internal control) : CNhs14433 ctss	0	0	0	0
whole body, embryo E17.5, pool1 (internal control) : CNhs14457 ctss	0	0	0	0
whole body, embryo E17.5, pool1 (internal control) : CNhs14521 ctss	0	0	0	0
whole body, embryo E17.5, pool1 (internal control) : CNhs14545 ctss	0	0	0	0
whole body, embryo E17.5, pool1 (internal control) : CNhs14569 ctss	0	0	0	0
whole body, embryo E17.5, pool1 (internal control) : CNhs14593 ctss	0	0	0	0
whole body, embryo E18 : CNhs10516 ctss	0	0	106.907	1.871
whole body, neonate N00 : CNhs10525 ctss	0	0	92.18	0.645
whole body, neonate N01 : CNhs10576 ctss	2.578	0	89.332	2.869
whole body, neonate N06 : CNhs10515 ctss	0.574	0.662	74.56	1.324
whole body, neonate N10 : CNhs10518 ctss	0	1.159	78.139	2.319
