# Supplementary material for: Epigenetic regulation of Wnt7b expression by the cis-acting long noncoding RNA Lnc-Rewind in muscle stem cells
Source: eLife. 2021 Jan 12;10:e54782. doi: 10.7554/eLife.54782 (PMC7837680; doi:10.7554/eLife.54782)
Supplement: Figure 3—source data 2. [file elife-54782-fig3-data2.xlsx]

## Sheet: Sheet1
3C	MuSCs Wt GAP-SCR vs GAP-REW
	Ttll12		ΔCt	ΔΔCt	fold change	Average FC	SEM	t-test
		Scr 1	9.87612	0	1	2.02206	0.97576	0.800425
		Scr 2	7.69962	-2.1765	4.52055
		Scr 3	8.5436	-1.33251	2.51841
		Scr 4	14.2192	4.3431	0.0492716
		KD 1	8.42559	-1.45052	2.73307	1.82573	0.743105
		KD 2	8.13926	-1.73685	3.33307
		KD 3	9.6456	-0.230515	1.17325
		KD 4	13.8527	3.97662	0.0635213
	Samm50		ΔCt	ΔΔCt	fold change	Average FC	SEM	t-test
		Scr 1	6.50814	0	1	1.18586	0.591817	0.99585
		Scr 2	5.00845	-1.49969	2.82782
		Scr 3	6.64125	0.133111	0.911863
		Scr 4	14.5576	8.04943	0.00377468
		KD 1	16.5167	10.0086	0.000970772	1.18281	1.05249
		KD 2	4.39454	-2.1136	4.32769
		KD 3	7.82934	1.32121	0.4002
		KD 4	15.221	8.7129	0.00238318
	Parvb		ΔCt	ΔΔCt	fold change	Average FC	SEM	t-test
		Scr 1	3.43405	-2.57964	5.97792	2.64175	1.24578	0.769301
		Scr 2	4.38552	-1.62817	3.09121
		Scr 3	6.01369	0	1
		Scr 4	7.01986	1.00617	0.497866
		KD 1	5.76608	-0.247609	1.18724	3.51073	1.99703
		KD 2	4.35012	-1.66357	3.16799
		KD 3	2.8046	-3.20909	9.24766
		KD 4	7.19804	1.18435	0.440023
	Prr5		ΔCt	ΔΔCt	fold change	Average FC	SEM	t-test
		Scr 1	10.492	0	1	0.879483	0.164871	0.477642
		Scr 2	10.5027	0.0107689	0.992563
		Scr 3	10.3141	-0.177842	1.13119
		Scr 4	11.835	1.34308	0.394177
		KD 1	9.17814	-1.31382	2.48598	1.21226	0.425682
		KD 2	10.6884	0.196472	0.872682
		KD 3	10.8869	0.394974	0.760503
		KD 4	10.9462	0.454268	0.72988
	Nup50		ΔCt	ΔΔCt	fold change	Average FC	SEM	t-test
		Scr 1	5.1721	-2.77708	6.85462	2.52753	1.49945	0.859649
		Scr 2	6.85909	-1.09008	2.12886
		Scr 3	7.94917	0	1
		Scr 4	10.9303	2.98112	0.126647
		KD 1	7.2354	-0.713774	1.64009	2.9405	1.29864
		KD 2	5.9643	-1.98488	3.95829
		KD 3	5.35525	-2.59392	6.03738
		KD 4	10.9348	2.98561	0.126253
	Fam118a		ΔCt	ΔΔCt	fold change	Average FC	SEM	t-test
		Scr 1	9.47347	-0.999945	1.99992	1.99822	1.07843	0.321586
		Scr 2	8.15357	-2.31985	4.9928
		Scr 3	10.4734	0	1
		Scr 4	22.9614	12.488	0.000174077
		KD 1	18.5585	8.08509	0.00368252	1.29782	0.859132
		KD 2	8.61416	-1.85926	3.6282
		KD 3	9.83272	-0.640694	1.55908
		KD 4	22.1585	11.6851	0.000303703
	Fbln1		ΔCt	ΔΔCt	fold change	Average FC	SEM	t-test
		Scr 1	9.79325	0.298886	0.81288	1.58248	0.99228	0.806333
		Scr 2	9.49436	0	1
		Scr 3	7.32726	-2.1671	4.49121
		Scr 4	14.7692	5.27484	0.0258295
		KD 1	9.24246	-0.251903	1.19078	1.50063	0.729719
		KD 2	9.16519	-0.329167	1.25629
		KD 3	7.67822	-1.81614	3.52138
		KD 4	14.3689	4.87453	0.0340894
	Atxn10		ΔCt	ΔΔCt	fold change	Average FC	SEM	t-test
		Scr 1	6.57488	0.111806	0.925429	0.931477	0.314089	0.723728
		Scr 2	6.46307	0	1
		Scr 3	5.72545	-0.737619	1.66742
		Scr 4	9.37294	2.90987	0.133058
		KD 1	6.43986	-0.0232182	1.01622	0.964253	0.302221
		KD 2	6.16301	-0.300062	1.2312
		KD 3	5.87652	-0.586557	1.50166
		KD 4	9.67489	3.21182	0.107931
	Wnt7b		ΔCt	ΔΔCt	fold change	Average FC	SEM	t-test
		Scr 1	9.92201	0.720227	0.607002	0.803516	0.183181	0.0383869
		Scr 2	8.93045	-0.271328	1.20692			*
		Scr 3	9.20178	0	1
		Scr 4	10.5232	1.3214	0.400145
		KD 1	8.17669	-1.02509	2.03509	2.38151	0.58969
		KD 2	7.69647	-1.50531	2.83885
		KD 3	7.30988	-1.8919	3.71123
		KD 4	9.28974	0.0879548	0.940856
	Cdpf1		ΔCt	ΔΔCt	fold change	Average FC	SEM	t-test
		Scr 1	7.63258	-3.11445	8.6605	3.90508	2.05099	0.684823
		Scr 2	8.1727	-2.57433	5.95593
		Scr 3	10.747	0	1
		Scr 4	18.7446	7.99761	0.00391274
		KD 1	14.4435	3.69648	0.0771347	2.67969	1.52856
		KD 2	8.42211	-2.32492	5.01038
		KD 3	8.25494	-2.49209	5.62592
		KD 4	18.2946	7.54758	0.00534505
	Gtse1		ΔCt	ΔΔCt	fold change	Average FC	SEM	t-test
		Scr 1	7.48074	1.71895	0.303769	1.33364	0.871699	0.502214
		Scr 2	3.80258	-1.9592	3.88847
		Scr 3	5.76179	0	1
		Scr 4	8.57438	2.81259	0.142339
		KD 1	6.43125	0.669464	0.62874	0.643444	0.232127
		KD 2	6.81323	1.05144	0.482485
		KD 3	5.40419	-0.357601	1.28129
		KD 4	8.22568	2.4639	0.181256
	Trmu		ΔCt	ΔΔCt	fold change	Average FC	SEM	t-test
		Scr 1	9.33577	0	1	1.34415	0.471318	0.101418
		Scr 2	8.50218	-0.833591	1.78212
		Scr 3	8.08392	-1.25184	2.38146
		Scr 4	11.5666	2.23086	0.213032
		KD 1	10.1268	0.791081	0.577911	0.728575	0.306468
		KD 2	10.2631	0.927368	0.525817
		KD 3	8.64631	-0.68946	1.61268
		KD 4	11.673	2.3372	0.197894
	Gramd4		ΔCt	ΔΔCt	fold change	Average FC	SEM	t-test
		Scr 1	13.2891	2.04106	0.242985	0.657954	0.217015	0.520451
		Scr 2	11.2481	0	1
		Scr 3	11.1585	-0.0895958	1.06407
		Scr 4	12.8706	1.62256	0.324759
		KD 1	10.883	-0.365067	1.28794	0.870919	0.239728
		KD 2	11.7733	0.525261	0.694833
		KD 3	10.952	-0.296057	1.22778
		KD 4	13.1205	1.87241	0.273118
	Cerk		ΔCt	ΔΔCt	fold change	Average FC	SEM	t-test
		Scr 1	10.4557	-0.578525	1.49332	1.09393	0.156307	0.14634
		Scr 2	11.0342	0	1
		Scr 3	11.4619	0.427651	0.743471
		Scr 4	10.8465	-0.187665	1.13892
		KD 1	10.2839	-0.750318	1.68216	1.74819	0.312958
		KD 2	9.63119	-1.40301	2.64453
		KD 3	10.74	-0.294219	1.22622
		KD 4	10.5083	-0.525909	1.43984
	Tbc1d22a		ΔCt	ΔΔCt	fold change	Average FC	SEM	t-test
		Scr 1	11.0111	2.83289	0.14035	0.681751	0.335588	0.23051
		Scr 2	8.17822	0	1
		Scr 3	7.61651	-0.561711	1.47602
		Scr 4	11.3543	3.17612	0.110635
		KD 1	10.1545	1.97624	0.254152	0.251827	0.0632815
		KD 2	10.2416	2.06337	0.239257
		KD 3	9.45887	1.28066	0.411608
		KD 4	11.4675	3.28926	0.10229
	Fam19a5		ΔCt	ΔΔCt	fold change	Average FC	SEM	t-test
		Scr 1	4.01023	-3.14714	8.85898	2.87506	2.01066	0.549801
		Scr 2	6.63894	-0.518436	1.4324
		Scr 3	7.15737	0	1
		Scr 4	9.41687	2.2595	0.208844
		KD 1	3.64254	-3.51483	11.4306	3.37866	2.69851
		KD 2	8.24539	1.08802	0.470406
		KD 3	6.6075	-0.549872	1.46396
		KD 4	9.89721	2.73984	0.149701
3D			Ctr+Scr					KD Lnc-Rewind					KD Lnc-Rewind+siWnt7b
	MuSCs Wt		DAPI	EdU	%EdU/DAPI			DAPI	EdU	%EdU/DAPI			DAPI	EdU	%EdU/DAPI
	Wt 1	Foto 1	816	241	29.5343		Foto 1	565	104	18.4071		Foto 1	1215	332	27.3251			N5		Rescue
		Foto 2	426	112	26.2911		Foto 2	532	112	21.0526		Foto 2	604	141	23.3444				GAP-SCR/si-CTR	13.7201
		Foto 3	559	145	25.9392		Foto 3	593	133	22.4283		Foto 3	537	143	26.6294				GAP-REW	5.96496
		Foto 4	655	188	28.7023		Foto 4	604	133	22.0199		Foto 4	603	132	21.8905				GAP-REW/si-Wnt7b	9.74729
		Foto 5	818	247	30.1956		Foto 5	488	59	12.0902		Foto 5	648	216	33.3333
		Foto 6	903	257	28.4607		Foto 6	581	126	21.6867		Foto 6	971	269	27.7034			SEM	GAP-SCR/si-CTR	1.03767
		Foto 7	775	220	28.3871		Foto 7	572	111	19.4056		Foto 7	858	160	18.648				GAP-REW	1.06795
		Foto 8	879	213	24.2321		Foto 8	512	107	20.8984		Foto 8	771	153	19.8444				GAP-REW/si-Wnt7b	1.19236
		Foto 9	478	108	22.5941		Foto 9	538	121	22.4907		Foto 9	656	205	31.25
		Foto 10	560	141	25.1786		Foto 10	554	84	15.1625		Foto 10	587	124	21.1244
	Wt2	Foto 1	183	13	7.10383		Foto 1	14	1	7.14286		Foto 2	108	12	11.1111
		Foto 2	136	11	8.08824		Foto 2	17	1	5.88235		Foto 3	225	12	5.33333
		Foto 4	152	10	6.57895		Foto 3	7	1	14.2857		Foto 4	178	11	6.17978		Tukey's multiple comparisons test	Mean Diff,	95,00% CI of diff,	Significant?	Summary	Adjusted P Value
		Foto 6	188	13	6.91489		Foto 4	22	0	0		Foto 5	147	6	4.08163		siCtrl vs. KD	7.755	4,067 to 11,44	Yes	****	<0,0001
		Foto 7	242	25	10.3306		Foto 5	19	0	0		Foto 6	331	39	11.7825		siCtrl vs. KD/siWnt7b	3.973	0,2849 to 7,661	Yes	*	0.0314
		Foto 8	287	27	9.40767		Foto 6	17	0	0		Foto 7	256	15	5.85938		KD vs. KD/siWnt7b	-3.782	-7,470 to -0,09449	Yes	*	0.043
		Foto 9	285	34	11.9298		Foto 7	20	0	0		Foto 8	270	13	4.81481
		Foto 10	245	22	8.97959		Foto 8	15	1	6.66667		Foto 9	193	10	5.18135
		Foto 11	393	41	10.4326		Foto 9	36	1	2.77778		Foto 10	105	14	13.3333
		Foto 12	329	42	12.766		Foto 10	44	1	2.27273		Foto 11	312	38	12.1795
	Wt3	Foto 1	138	8	5.7971		Foto 1	47	0	0		Foto 1	81	1	1.23457
		Foto 2	133	9	6.76692		Foto 2	177	2	1.12994		Foto 2	179	6	3.35196
		Foto 4	269	21	7.80669		Foto 3	183	6	3.27869		Foto 3	208	5	2.40385
		Foto 5	624	84	13.4615		Foto 4	102	3	2.94118		Foto 4	66	3	4.54545
		Foto 6	317	26	8.20189		Foto 5	83	1	1.20482		Foto 5	248	5	2.01613
		Foto 7	284	17	5.98592		Foto 6	94	0	0		Foto 6	218	13	5.9633
		Foto 8	229	25	10.917		Foto 7	227	3	1.32159		Foto 7	142	7	4.92958
		Foto 9	200	11	5.5		Foto 8	195	1	0.512821		Foto 8	114	4	3.50877
		Foto 10	240	28	11.6667		Foto 9	106	3	2.83019		Foto 9	214	10	4.6729
		Foto 11	220	24	10.9091		Foto 10	14	0	0		Foto 10	117	7	5.98291
	Wt4	Foto 1	210	17	8.09524		Foto 1	124	1	0.806452		Foto 1	127	7	5.51181
		Foto 2	179	16	8.93855		Foto 2	137	0	0		Foto 2	126	4	3.1746
		Foto 3	196	18	9.18367		Foto 3	94	0	0		Foto 3	195	10	5.12821
		Foto 4	215	21	9.76744		Foto 4	64	0	0		Foto 4	143	6	4.1958
		Foto 5	221	15	6.78733		Foto 5	14	1	7.14286		Foto 5	158	7	4.43038
		Foto 6	264	34	12.8788		Foto 6	149	2	1.34228		Foto 6	186	7	3.76344
		Foto 7	217	22	10.1382		Foto 7	67	1	1.49254		Foto 7	61	4	6.55738
		Foto 8	216	28	12.963		Foto 8	66	0	0		Foto 8	126	7	5.55556
		Foto 9	275	40	14.5455		Foto 9	46	0	0		Foto 9	93	4	4.30108
		Foto 10	259	49	18.9189		Foto 10	81	3	3.7037		Foto 10	193	9	4.66321
	Wt5	Foto 1	372	60	16.129		Foto 1	69	1	1.44928		Foto 2	149	12	8.05369
		Foto 2	393	56	14.2494		Foto 2	125	4	3.2		Foto 3	196	11	5.61224
		Foto 3	389	57	14.653		Foto 3	109	2	1.83486		Foto 4	224	15	6.69643
		Foto 4	367	41	11.1717		Foto 4	97	8	8.24742		Foto 5	242	14	5.78512
		Foto 5	294	32	10.8844		Foto 5	91	2	2.1978		Foto 6	142	16	11.2676
		Foto 6	429	69	16.0839		Foto 6	119	3	2.52101		Foto 7	76	3	3.94737
		Foto 7	292	37	12.6712		Foto 7	142	2	1.40845		Foto 8	119	8	6.72269
		Foto 8	314	23	7.32484		Foto 8	267	21	7.86517		Foto 9	95	4	4.21053
		Foto 9	318	36	11.3208		Foto 10	136	7	5.14706		Foto 10	212	22	10.3774
		Foto 10	293	30	10.2389		Foto 11	100	2	2		Foto 11	242	19	7.85124
					Mean %	SEM		9075		Mean %	SEM				Mean %	SEM
	Mean 5 mice	tot cells:	17676		13.7201	1.03767				5.96496	1.06795		14267		9.74729	1.19236
3E	Single myofibers
	Total Pax7	Ctr			KD			KD/siWnt7b
		0			2			9
		20			0			4
		1			8			2
		0			0			13
		10			6			17					Fibers Wt 96h
		7			0			1				GAP-SCR/si-SCR	10.3731
		6			5			3				GAP-REW	3.73973
		0			1			59				GAP-REW/si-Wnt7b	19.5
		10			8			16
		16			0			47			SEM	GAP-SCR/si-SCR	2.11131
		3			0			37				GAP-REW	0.849395
		1			0			43				GAP-REW/si-Wnt7b	3.97398
		21			7			17
		1			0			4
		2			0			25
		4			1			22
		1			0			13
		2			1			19
		0			10
		0			0		Mean	19.5
		8			0		SEM	3.97398
		1			0						Tukey's multiple comparisons test	Mean Diff,	95,00% CI of diff,	Significant?	Summary	Adjusted P Value
		4			0						siCtrl vs. KD	6.633	1,220 to 12,05	Yes	*	0.0118
		4			7						siCtrl vs. KD/siWnt7b	-9.127	-17,62 to -0,6324	Yes	*	0.032
		0			0						KD 023 vs. KD/siWnt7b	-15.76	-24,18 to -7,340	Yes	****	<0,0001
		0			4
		0			0
		0			4
		6			6
		0			3
		2			0
		0			0
		0			8
		0			3
		55			0
		7			10
		7			0
		5			0
		13			0
		0			10
		0			25
		8			0
		11			0
		0			0
		3			0
		4			0
		0			0
		48			0
		7			0
		0			6
		55			4
		80			0
		0			0
		0			12
		51			17
		1			0
		0			0
		4			0
		6			0
		37			0
		51			2
		0			1
		5			0
		21			0
		19			2
		20			42
		47			0
					0
	Mean	10.3731			30
	SEM	2.11131			1
					8
					5
					14
				Mean	3.73973
				SEM	0.849395
	Single myofibers
	Cluster/Pairs/Single		Scr					KD Lnc Rewind					KD/siWnt7b
			Fiber	Cluster	Pairs	Single		Fiber	Cluster	Pairs	Single		Fiber	Cluster	Pairs	Single
			1	2	0	0		1	0	1	0		1	0	3	3			TOT		Cluster	Pairs	Single
			1	2	2	0		1	1	4	0		1	0	2	0				Ctr	1.11236	1.4	0.827586
			1	1	0	0		1	0	1	0		1	0	0	2				KD023	0.520408	0.43299	0.576923
			1	1	3	0		1	0	0	0		1	2	2	1				Rescue	2.16667	1.55556	1.94444
			1	0	0	0		1	1	1	0		1	3	3	0
			1	0	0	0		1	0	0	0		1	0	0	1			SEM	Ctr	0.176099	0.252827	0.190812
			1	0	0	0		1	0	0	0		1	0	1	1				KD023	0.0953689	0.0801459	0.118879
			1	0	0	0		1	0	0	0		1	8	0	2				Rescue	0.561569	0.381108	0.467731
			1	1	6	0		1	0	0	0		1	2	0	2
			1	1	7	0		1	0	1	0		1	6	1	2
			1	0	0	0		1	1	1	0		1	2	0	3
			1	2	4	0		1	1	0	0		1	6	5	5
			1	0	1	1		1	0	0	0		1	1	1	2			Clusters
			1	0	0	0		1	0	0	0		1	0	2	0			Tukey's multiple comparisons test	Mean Diff,	95,00% CI of diff,	Significant?	Summary	Adjusted P Value
			1	0	1	0		1	0	0	0		1	3	0	2			siCtrl vs. KD 023	0.5859	0,09357 to 1,078	Yes	*	0.015
			1	0	1	0		1	0	1	0		1	1	5	8			siCtrl vs. KD023 siWnt7b	-1.065	-1,941 to -0,1879	Yes	*	0.0127
			1	0	1	0		1	0	1	0		1	2	2	1			KD 023 vs. KD023 siWnt7b	-1.651	-2,521 to -0,7804	Yes	****	<0,0001
			1	0	0	1		1	0	0	0		1	3	1	0
			1	0	0	0		1	0	0	0
			1	0	0	0		1	0	0	0		N:	Mean Cluster per fiber	Mean pairs per fiber	Mean single per fiber			Pairs
			1	0	0	0		1	0	0	0		18	2.16667	1.55556	1.94444			Tukey's multiple comparisons test	Mean Diff,	95,00% CI of diff,	Significant?	Summary	Adjusted P Value
			1	0	0	2		1	1	1	0		SEM	0.561569	0.381108	0.467731			siCtrl vs. KD 023	0.9574	0,3771 to 1,538	Yes	***	0.0004
			1	0	0	0		1	0	0	0								siCtrl vs. KD023 siWnt7b	-0.1687	-1,191 to 0,8537	No	ns	0.9197
			1	2	0	0		1	0	0	0								KD 023 vs. KD023 siWnt7b	-1.126	-2,138 to -0,1144	Yes	*	0.025
			1	1	0	0		1	0	0	0
			1	0	1	0		1	0	1	0
			1	0	0	0		1	0	0	0								Single
			1	1	0	0		1	0	0	0								Tukey's multiple comparisons test	Mean Diff,	95,00% CI of diff,	Significant?	Summary	Adjusted P Value
			1	0	0	0		1	0	0	0								siCtrl vs. KD 023	0.2478	-0,2713 to 0,7669	No	ns	0.4986
			1	0	0	0		1	0	0	0								siCtrl vs. KD023 siWnt7b	-1.124	-2,057 to -0,1909	Yes	*	0.0135
			1	0	3	0		1	0	0	0								KD 023 vs. KD023 siWnt7b	-1.372	-2,292 to -0,4514	Yes	**	0.0015
			1	0	0	0		1	0	0	0
			1	0	1	0		1	1	0	0
			1	0	0	0		1	0	0	0
			1	0	0	0		1	0	1	0
			1	0	0	0		1	0	0	0
			1	9	4	0		1	1	0	0
			1	1	0	0		1	0	0	0
			1	2	2	0		1	0	0	0
			1	1	0	0		1	0	0	0
			1	1	0	0		1	0	0	0
			1	0	0	0		1	2	0	1
			1	0	0	0		1	1	0	0
			1	1	0	0		1	0	0	0
			1	2	0	0		1	2	1	2
			1	0	0	0		1	0	0	0
			1	0	1	1		1	0	0	0
			1	0	2	0		1	0	0	0
			1	0	0	0		1	1	2	2
			1	1	3	0		1	3	2	4
			1	1	2	0		1	0	0	0
			1	1	0	0		1	0	0	0
			1	0	1	0		1	0	0	0
			1	0	0	0		1	0	0	0
			1	0	0	0		1	0	0	0
			1	1	0	0		1	0	0	0
			1	4	2	1		1	0	0	0
			1			1		1	0	0	0
			1	3	1	2		1	1	1	1
			1	1	1	2		1	1	0	0
			1	1				1	0	0	0
			1	1		3		1	0	0	0
			1	2				1	2	1	0
			1	1		1		1	3	1	1
			1	1	1	1		1	0	0	0
			1	2				1	0	0	0
			1	3	6	2		1	0	0	0
			1					1	0	0	0
			1		1	1		1	0	0	0
			1					1	0	1	0
			1		6			1	0	0	1
			1	2	4	1		1	0	0	0
			1	2				1	0	0	0
			1	6	3	4		1	1	0	0
			1	0	3	1		1	0	0	0
			1	0	0	0		1	0	0	0
			1	3	4	7		1	0	1	2
			1	6	9	5		1	0	0	0
			1	0	0	0		1			3
			1	0	0	0		1	1
			1	5	6	7		1			1
			1	0	0	1		1
			1	0	0	0		1			1
			1	0	2	0		1
			1	0	2	2		1		2	2
			1	5	5	5		1
			1	3	2	2		1
			1	0	0	0		1
			1	1	0	0		1	1
			1	3	1	2		1
			1	4	0	2		1	1
			1	2	1	4		1
			1	0	0	0		1	1
			1	3	13	10		1
								1
			N:	Mean Cluster per fiber	Mean pairs per fiber	Mean single per fiber		1
			94	1.11236	1.4	0.827586		1
			SEM	0.176099	0.252827	0.190812		1		1	3
								1
								1		1	4
								1		1	1
								1
								1		1
								1
								1
								1	2	3
								1			2
								1	1		1
								1	1		1
								1	1		2
								1
								1			2
								1		1	2
								1
								1	2	1	1
								1	1
								1	1
								1
								1		1
								1		1
								1			1
								1			1
								1			1
								1	0	0	2
								1	6	4	6
								1	0	0	0
								1	0	0	0
								1	3	0	7
								1	0	0	1
								1	2	0	0
								1	1	0	1
								1	2	1	0
								N:	Mean Cluster per fiber	Mean pairs per fiber	Mean single per fiber
								132	0.520408	0.43299	0.576923
								SEM	0.0953689	0.0801459	0.118879
