# Supplementary material for: Epigenetic regulation of Wnt7b expression by the cis-acting long noncoding RNA Lnc-Rewind in muscle stem cells
Source: eLife. 2021 Jan 12;10:e54782. doi: 10.7554/eLife.54782 (PMC7837680; doi:10.7554/eLife.54782)
Supplement: Figure 4—figure supplement 1—source data 1. [file elife-54782-fig4-figsupp1-data1.xlsx]

## Sheet: Sheet1
4B	C2C12 GM RIP
		rep1	rep2	rep3	rep4	average	sem
Lnc-Rew		%input	%input	%input	%input	%input		TTEST
GM	IgG	0.000104189	0.00765516	0.00390729	0.00085773	0.00313109	0.00171756	0.0123139
	G9a	0.0605376	0.0332215	0.0847631	0.0259061	0.0511071	0.013468	0.012573
	Ezh2	0.00111763	0.00296004	0.00863847	0.00048723	0.00330084	0.00185493	0.948646
gapdh
GM	IgG		0.0489075	0.00952669	0.0001789	0.0195377	0.0149308	0.485905
	G9a		0.0379695	0.0262885	0.0296234	0.0312938	0.0034739	0.719377
	Ezh2		0.0667423	0.00117794	0.00016218	0.0226941	0.022026	0.911295
Kcnq1ot1
GM	IgG		0.0134637	0.00660174	0.00840143	0.00948896	0.00205416	0.00103942
	G9a		0.0896907	0.129048	0.120902	0.113214	0.0119943	0.0278783
	Ezh2		0.0237802	0.0392543	0.0527652	0.0385999	0.00837364	0.00697907
4C	C2C12 GM ChIP G9a
	N:3
	G9a/91	% inp			mean	SEM
					G9a/91		T.test compared to Gapdh
	IgG GM 1	0.0065209	GM	IgG	0.00296048	0.0017864	0.0300998
	IgG GM 2	0.000922797		IP G9a	0.255967	0.069134	*
	IgG GM 3	0.00143775
	IP G9a GM 1	0.139891
	IP G9a GM 2	0.248941
	IP G9a GM 3	0.379069
	N:3
	G9a/93	% inp			mean	SEM
					G9a/93		T.test compared to Gapdh
	IgG GM 1	0.00380286	GM	IgG	0.00666228	0.00281094	0.0101264
	IgG GM 2	0.0122839		IP G9a	0.207282	0.0414418	**
	IgG GM 3	0.0039001
	IP G9a GM 1	0.160748
	IP G9a GM 2	0.289948			#NAME?
	IP G9a GM 3	0.17115
	N:3
	G9a/94	% inp			mean	SEM
					G9a/94		T.test compared to Gapdh
	IgG GM 1	0.00199353	GM	IgG	0.0107378	0.00488462	0.0172438
	IgG GM 2	0.0188824		IP G9a	0.169153	0.0393613	**
	IgG GM 3	0.0113375
	IP G9a GM 1	0.0957372
	IP G9a GM 2	0.230468
	IP G9a GM 3	0.181254
	N:3
	G9a/95	% inp			mean	SEM
					G9a/95		T.test compared to Gapdh
	IgG GM 1	0.00180918	GM	IgG	0.0156781	0.014315	0.00997109
	IgG GM 2	0.0443034		IP G9a	0.102053	0.020025	***
	IgG GM 3	0.000921652
	IP G9a GM 1	0.0660532
	IP G9a GM 2	0.135252
	IP G9a GM 3	0.104853
	N:3
	Gapdh ChIP	% inp			mean	SEM
					Gapdh
	IgG GM 1	0.00259466	GM	IgG	0.00938275	0.00811751
	IgG GM 2	4.82144e-06		IP G9a	0.0281375	0.00746068
	IgG GM 3	0.0255488
	IP G9a GM 1	0.0132539
	IP G9a GM 2	0.0364974
	IP G9a GM 3	0.0346614
	N:3
	MyoG 5'	% inp			mean	SEM
					MyoG 5'
	IgG GM 1	0.00184429	GM	IgG	0.0100033	0.00909568
	IgG GM 2	0.0281636		IP G9a	0.0584655	0.0096135
	IgG GM 3	2.11815e-06
	IP G9a GM 1	0.0448648
	IP G9a GM 2	0.0770354
	IP G9a GM 3	0.0534961
	N:3
	R15	% inp			mean	SEM
					R15
	IgG GM 1	0.00174538	GM	IgG	0.00169892	0.000222592
	IgG GM 2	0.00205913		IP G9a	0.0473382	0.00873664
	IgG GM 3	0.00129226
	IP G9a GM 1	0.031519
	IP G9a GM 2	0.0488213
	IP G9a GM 3	0.0616744
