# Supplementary material for: Epigenetic regulation of Wnt7b expression by the cis-acting long noncoding RNA Lnc-Rewind in muscle stem cells
Source: eLife. 2021 Jan 12;10:e54782. doi: 10.7554/eLife.54782 (PMC7837680; doi:10.7554/eLife.54782)
Supplement: Figure 4—source data 1. [file elife-54782-fig4-data1.xlsx]

## Sheet: Sheet1
4A
C2C12 GM CLIP		Gapdh
	rep1	rep2	rep3	Average	SEM
IP IgG/Inp	0.0276064	0.00757926	0.000740771	0.011975	0.008061
IP G9a/Inp	4.32089	0.734737	3.44235	2.83266	1.07919
		Kncq1ot
	rep1	rep2	rep3	Average	SEM
IP IgG/Inp	1.26084	0.0421698	2.27554e-05	0.434346	0.413429
IP G9a/Inp	46.1513	4.83747	15.465	22.1513	12.386
		Lnc-Rewind spliced
	rep1	rep2	rep3	Average	SEM
IP IgG/Inp	1.51878	0.234349	8.11674e-06	0.584378	0.472071
IP G9a/Inp	22.2911	8.4425	49.4504	26.728	12.044
		Lnc-Rewind unspliced
	rep1	rep2	rep3	Average	SEM
IP IgG/Inp	12.9742	0.667306	2.58263e-05	4.54719	4.21792
IP G9a/Inp	56.687	15.7196	54.0298	42.1455	13.2352
4B
C2C12 RNA Pull Down		Lnc-Rewind
	rep1	rep2	rep3	Average	SEM	T-Test
PD Lnc-Rew/Inp	1.91461	2.36577	2.14338	2.14125	0.130242	0.0311832
PD LacZ/Inp	1.15977	0.95385	1.13577	1.08313	0.0650103
						T-Test
						0.00440111
		Gapdh
	rep1	rep2	rep3	Average	SEM	T-Test
PD Lnc-Rew/Inp	0.214396	0.23105	0.275698	0.240381	0.018301	0.112285
PD LacZ/Inp	0.192509	0.186657	0.190565	0.18991	0.0017208
4C	MuSCs Wt siG9a
N3					ΔCt	ΔΔCt	fold change	Media FC	SEM	t-test			G9a
	G9a	Ctr	Wt 1	Ctr	6.49744	0	1	0.999102	0.0448103	0.000325598		Ctr	0.999102
			Wt 2	Ctr	6.6161	0.118659	0.921043					siG9a	0.304074
			Wt 3	Ctr	6.39141	-0.10603	1.07626				SEM	Ctr	0.0448103
		siG9a	Wt 1	siG9a	7.94969	1.45225	0.365452	0.304074	0.0404965			siG9a	0.0404965
			Wt 2	siG9a	8.14513	1.64769	0.319152				N3
			Wt 3	siG9a	8.63274	2.1353	0.22762				t-test Ctr/siG9a		0.000325598	***
N3					ΔCt	ΔΔCt	fold change	Media FC	SEM	t-test			Wnt7b
	Wnt7b	Ctr	Wt 1	Ctr	10.123	0	1	1.04663	0.0307148	0.00930983		Ctr	1.04663
			Wt 2	Ctr	9.97955	-0.143494	1.10458					siG9a	3.24543
			Wt 3	Ctr	10.073	-0.0500584	1.03531				SEM	Ctr	0.0307148
		siG9a	Wt 1	siG9a	8.06642	-2.05662	4.16011	3.24543	0.466841			siG9a	0.466841
			Wt 2	siG9a	8.73029	-1.39276	2.6258				N3
			Wt 3	siG9a	8.56214	-1.5609	2.95038				t-test Ctr/siG9a		0.00930983	**
4D		Colocalization %
	rep1	rep2	rep3	average	SD	T-Test
Lnc-Rew / Wnt7b	53.48	43.44	45.19	47.37	5.36	0.000141667
Lnc-Rew / neg CTR	3.7	1.92	2.32	2.65	0.93
4E
MuSCs Wt GAP-SCR vs GAP-REW ChIP H3K9me2			Wnt7b/1
	rep1	rep2	rep3	rep4	rep5	rep6	Average	SEM	T-Test
SCR (IP-IgG)/INP	0.556067	0.437322	1.03112	0.657253	2.43357	2.56824	1.2806	0.394725	0.0130362
KD (IP-IgG)/INP	0.16838	0.221844	0.266689	0.206116	1.1863	1.17599	0.537554	0.203933
			Wnt7b/2
	rep1	rep2	rep3	rep4	rep5	rep6	Average	SEM	T-Test
SCR (IP-IgG)/INP	1.55275	1.88228	4.75806	2.92569	17.2274	16.8027	7.52482	3.03606	0.0411818
KD (IP-IgG)/INP	0.445167	2.36612	1.19098	1.82247	13.1359	11.5914	5.092	2.32291
			Wnt7b/3
	rep1	rep2	rep3	rep4	rep5	rep6	Average	SEM	T-Test
SCR (IP-IgG)/INP	0.931589	0.699557	1.31177	1.29269	6.10047	5.38153	2.6196	0.995854	0.0492882
KD (IP-IgG)/INP	0.849194	0.391421	0.572769	0.527224	3.30348	3.54319	1.53121	0.602214
			Wnt7b/4
	rep1	rep2	rep3	rep4	rep5	rep6	Average	SEM	T-Test
SCR (IP-IgG)/INP	4.99451	6.5163	6.47664	5.25473	34.111	40.6877	16.3402	6.71817	0.159999
KD (IP-IgG)/INP	5.01759	5.98637	5.59019	4.08559	25.4569	22.4007	11.4229	3.98291
			Ube2b
	rep1	rep2	rep3	rep4	rep5	rep6	Average	SEM	T-Test
SCR (IP-IgG)/INP	0.127413	0.222201	0.802391	0.76647	1.4117	1.36016	0.781722	0.221608	0.0714713
KD (IP-IgG)/INP	0.374769	0	0.101665	0.0424348	1.20891	0.926616	0.442398	0.208035
			R15
	rep1	rep2	rep3	rep4	rep5	rep6	Average	SEM	T-Test
SCR (IP-IgG)/INP	17.1357	14.0937	16.8369	8.79564	39.2807	36.6141	22.1261	5.16167	0.435043
KD (IP-IgG)/INP	18.4433	33.9048	10.434	9.71446	39.8037	38.6925	25.1655	5.69963
