# Supplementary material for: Epigenetic regulation of Wnt7b expression by the cis-acting long noncoding RNA Lnc-Rewind in muscle stem cells
Source: eLife. 2021 Jan 12;10:e54782. doi: 10.7554/eLife.54782 (PMC7837680; doi:10.7554/eLife.54782)
Supplement: Supplementary file 1. [file elife-54782-supp1.xlsx]

## Sheet: Sheet1
List and sequences of the oligonucleotides, LNA gapmers and siRNAs used
qRT-PCR
lnc-REW spliced FW	5'-tttcacttgctggcttttga-3'
lnc-REW spliced RV	5'-actcccagccagctgtgtc-3'
lnc-REW unspliced FW	5'-ccccaggaaagtaagcacct-3'
lnc-REW unspliced RV	5'-cagcacacaatcgtctctgg-3'
lnc-REW EX1 FW	5'-tgggcaagggagacatcatt-3'
lnc-REW EX5 RV	5'-ggttgtactgtggacctgga-3'
lnc-REW Int1 RV	5'-tgcttcagtcaggattgggg-3'
lnc-REW EX4 FW	5'-caacttccctgggtgactct-3'
lnc-REW Ex4 RV	5'-agagtcacccagggaagttg-3'
lnc-REW Int4 RV	5'-actgcaaggtttccatggtg-3'
hs_lnc-REW FW	5'-caggtcacgatcgggttcac-3'
hs_lnc-REW RV	5'-gatgggctcctgatgtctcg-3'
GAPDH FW	5'-tgacgtgccgcctggagaaa-3'
GAPDH RV	5'-agtgtagcccaagatgcccttcag-3'
pre-GAPDH FW	5'-ggctcatggtatgtaggcagt-3'
pre-GAPDH RV	5'-gaaaacacgggggcaatgagt-3'
hs_GAPDH FW	5'-ggaaggtgaaggtcggagtc-3'
hs_GAPDH RV	5'-ttaccagagttaaaagcagccc-3'
MyoG FW	5'-tcccaacccaggagatcatt-3'
MyoG RV	5'-catatcctccaccgtgatgc-3'
MCK FW	5'-ttacactctgcctccgcact-3'
MCK RV	5'-gtacttgcccttgaactcgc-3'
miR-Let7-b	Qiagen Cat. No MS00003122
miR-Let7-c	Qiagen Cat. No 218300
Fam19a5 FW	5'-tcctcgtcctggtgattcac-3'
Fam19a5 RV	5'-ccggtctagggtcacaatct-3'
Tbc1d22a FW	5'-gaagcagttctggaagcgc-3'
Tbc1d22a RV	5'-gtgccatgtaacagcggatc-3'
Cerk FW	5'-gtttgtgcccactgttgagt-3'
Cerk RV	5'-ctggtatcgaccccaatcac-3'
Gramd4 FW	5'-agagttggccccgatcatc-3'
Gramd4 RV	5'-catgttcagcacggcactc-3'
Trmu FW	5'-gctgtggacaatcttggagc-3'
Trmu RV	5'-cgtcaggcttcttagtgtgc-3'
Gtse1 FW	5'-aaccccaaagttctcacgga-3'
Gtse1 RV	5'-gtagtccctgatgagcgtct-3'
Cdpf1 FW	5'-cgtttgagtgccagctttgt-3'
Cdpf1 RV	5'-agaaacctggccttgtctga-3'
Atxn10 FW	5'-cgatcggagttgctgttgat-3'
Atxn10 RV	5'-gccacatcgaaaagctgtca-3'
Fbln1 FW	5'-agagcggcttcatacaggat-3'
Fbln1 RV	5'-cttctggcatgtgtaggagc-3'
Fam118a FW	5'-cggaggaaggtgatgaagga-3'
Fam118a RV	5'-ccaagctgtcaaacacctcc-3'
Nup50 FW	5'-ggaacattctcagtggccag-3'
Nup50 RV	5'-ggctcctccgctatcagatt-3'
Prr5 FW	5'-gggcatggtgattcttcgtg-3'
Prr5 RV	5'-aagaaatcccaggtctccgc-3'
Parvb FW	5'-gaggagcgtaccatgatcga-3'
Parvb RV	5'-gcacatcgttgatccagtcc-3'
Samm50 FW	5'-ggaagccgagtttgtggaag-3'
Samm50 RV	5'-atccttagtccgcccaagtc-3'
Ttll12 FW	5'-cagagcgactatggggcc-3'
Ttll12 RV	5'-cacctcctccacctgcatta-3'
Kcnq1ot1 FW	5'-ctgttccctagagcttgccc-3'
Kcnq1ot1 RV	5'-tggttaatcctgcctgcctg-3'
Wnt7b FW	5'-accttcacaacaatgaggcg-3'
Wnt7b RV	5'-cttcatgcggtcctccagaa-3'
Ube2b FW	5'-gccgaacttgaaactagcgac-3'
Ube2b RV	5'-gttgcttgcgggcaactacg-3'
R15 FW	5'-gtttttcatcggacggtggc-3'
R15 RV	5'-ccgccgctcatacaccataa-3'
Wnt7b/1 FW	5'-aggggcagattttggactct-3'
Wnt7b/1 RV	5'-ccccatgagtcatccctaga-3'
Wnt7b/2 FW	5'-agcaaccactaactgcactgt-3'
Wnt7b/2 RV	5'-tggctggatgatggatagat-3'
Wnt7b/3 FW	5'-agccagagctttgtgtaggc-3'
Wnt7b/3 RV	5'-caggatccaagccaagattt-3'
Wnt7b/4 FW	5'-taccagcactgcttctgtgg-3'
Wnt7b/4 RV	5'-tgctaacttcccaccctttg-3'
G9a FW	5'-ccaaacctagcaacggacag-3'
G9a RV	5'-gccacatctgaagtcaccttcc-3'
LNA GAPmers
GAP-SCR	Negative control A Exiqon cat. n.300610
GAP-REW_1	5'-atcttggatctagcta-3'
GAP-REW_2	5'-gagctggtgatgaatg-3'
GAP-REW_3	5'-gaagagagtggtgaag-3'
siRNAs
si-SCR	siRNA Universal Negative Control #1, 6-FAM cat. n. SIC007
siG9a 1	5'-caguuagguggcugugucu-3'
siG9a 1_AS	5'-agacacagccaccuaacug-3'
siG9a 2	5'-gacaucaagagcaaguauu-3'
siG9a 2_AS	5'-aauacuugcucuugauguc-3'
siWnt7b 1	5'-guugcuucgucaagugcaa-3'
siWnt7b 1_AS	5'-uugcacuugacgaagcaac-3'
siWnt7b 2	5'-cgcagaugggcaucgacga-3'
siWnt7b 2_AS	5'-ucgucgaugcccaucugcg-3'
RNA pulldown
REW_1	aagtgaaaatgatgtctccctt
REW_2	gacagggtcactttctcaaaag
REW_3	caacaggtatgaaccaggaaca
REW_4	ggacttcatcaagtttttatct
REW_5	gaagttgtcaagaagaagccgg
REW_6	accttgagaagttggaatgtac
REW_7	agctatctcctcattttttaag
REW_8	gcagaagaacagttacatagca
REW_9	aacttcctaaatgagacagctt
REW_10	aagctgtaggggaagaagctta
REW_11	gggaattgactatagacgtgac
REW_12	aagctatgtgttcatctgtaga
REW_13	gagctagacatttaggctacag
REW_14	ctgatacggacaggatcagaag
REW_15	tagaaacagggtctgaggcaaa
REW_16	tgattaggtttctcccataaag
REW_17	taacaaggaaggggtcctgaaa
REW_18	acagaaatgactcctttctcaa
REW_19	gactcaaggatgggaagatgag
REW_20	gaatatggagacaaggatctgc
REW_21	acaccatgaatcaagtcactat
REW_22	aaagagcagagacccagagaaa
REW_23	tggtgacactttgcatgcaaag
REW_24	tatagcacaatggcattttcat
REW_25	tactttccagaggaaggacatt
REW_26	caaagcctctaggtaaagacat
REW_27	aagtcaccatatcatatcatgg
REW_28	gagctggtgatgaatggaactg
REW_29	ttggctgtcaggatacaagtac
REW_30	cagaagcactttgaaggaggaa
REW_31	atgtggtggaatagctagagac
REW_32	tttggtgatcctatctatgatg
REW_33	cactaacaggcaggtcaaatac
REW_34	cagaaggaaatctgagccactg
REW_35	cctgtgatgataggaaacacta
REW_36	agaggagcttaggaacaaggtt
REW_37	caaaatgaagccgttaggtcta
REW_38	tcaagggacaagtccaaaactc
REW_39	ctcaaaacagtctttccttgtg
REW_40	tcaactctagcgtagtagaatc
REW_41	tgctgagggtattaatagactg
REW_42	caaaaccatacaacctactacc
REW_43	acagtagattgtatagttaccg
REW_44	ctttttgcatggtagttatcac
REW_45	ctggaacatagttgaaggtcta
REW_46	tcaatttcttctcggaagagac
REW_47	tactcatgggtgtgctaagaat
REW_48	gcctaccaaacagattgaggaa
REW_49	cagtaggttgtatagttatctt
REW_50	agaacatcctttatttataccc
LacZ_1	aatgtgagcgagtaacaacc
LacZ_2	attaagttgggtaacgccag
LacZ_3	aataattcgcgtctggcctt
LacZ_4	aattcagacggcaaacgct
