# Supplementary figures and images for: Epigenetic regulation of Wnt7b expression by the cis-acting long noncoding RNA Lnc-Rewind in muscle stem cells
Source: eLife journal article supplement (doi:10.7554/elife.54782), 2021-01-12

Figure 2-figure supplement 1

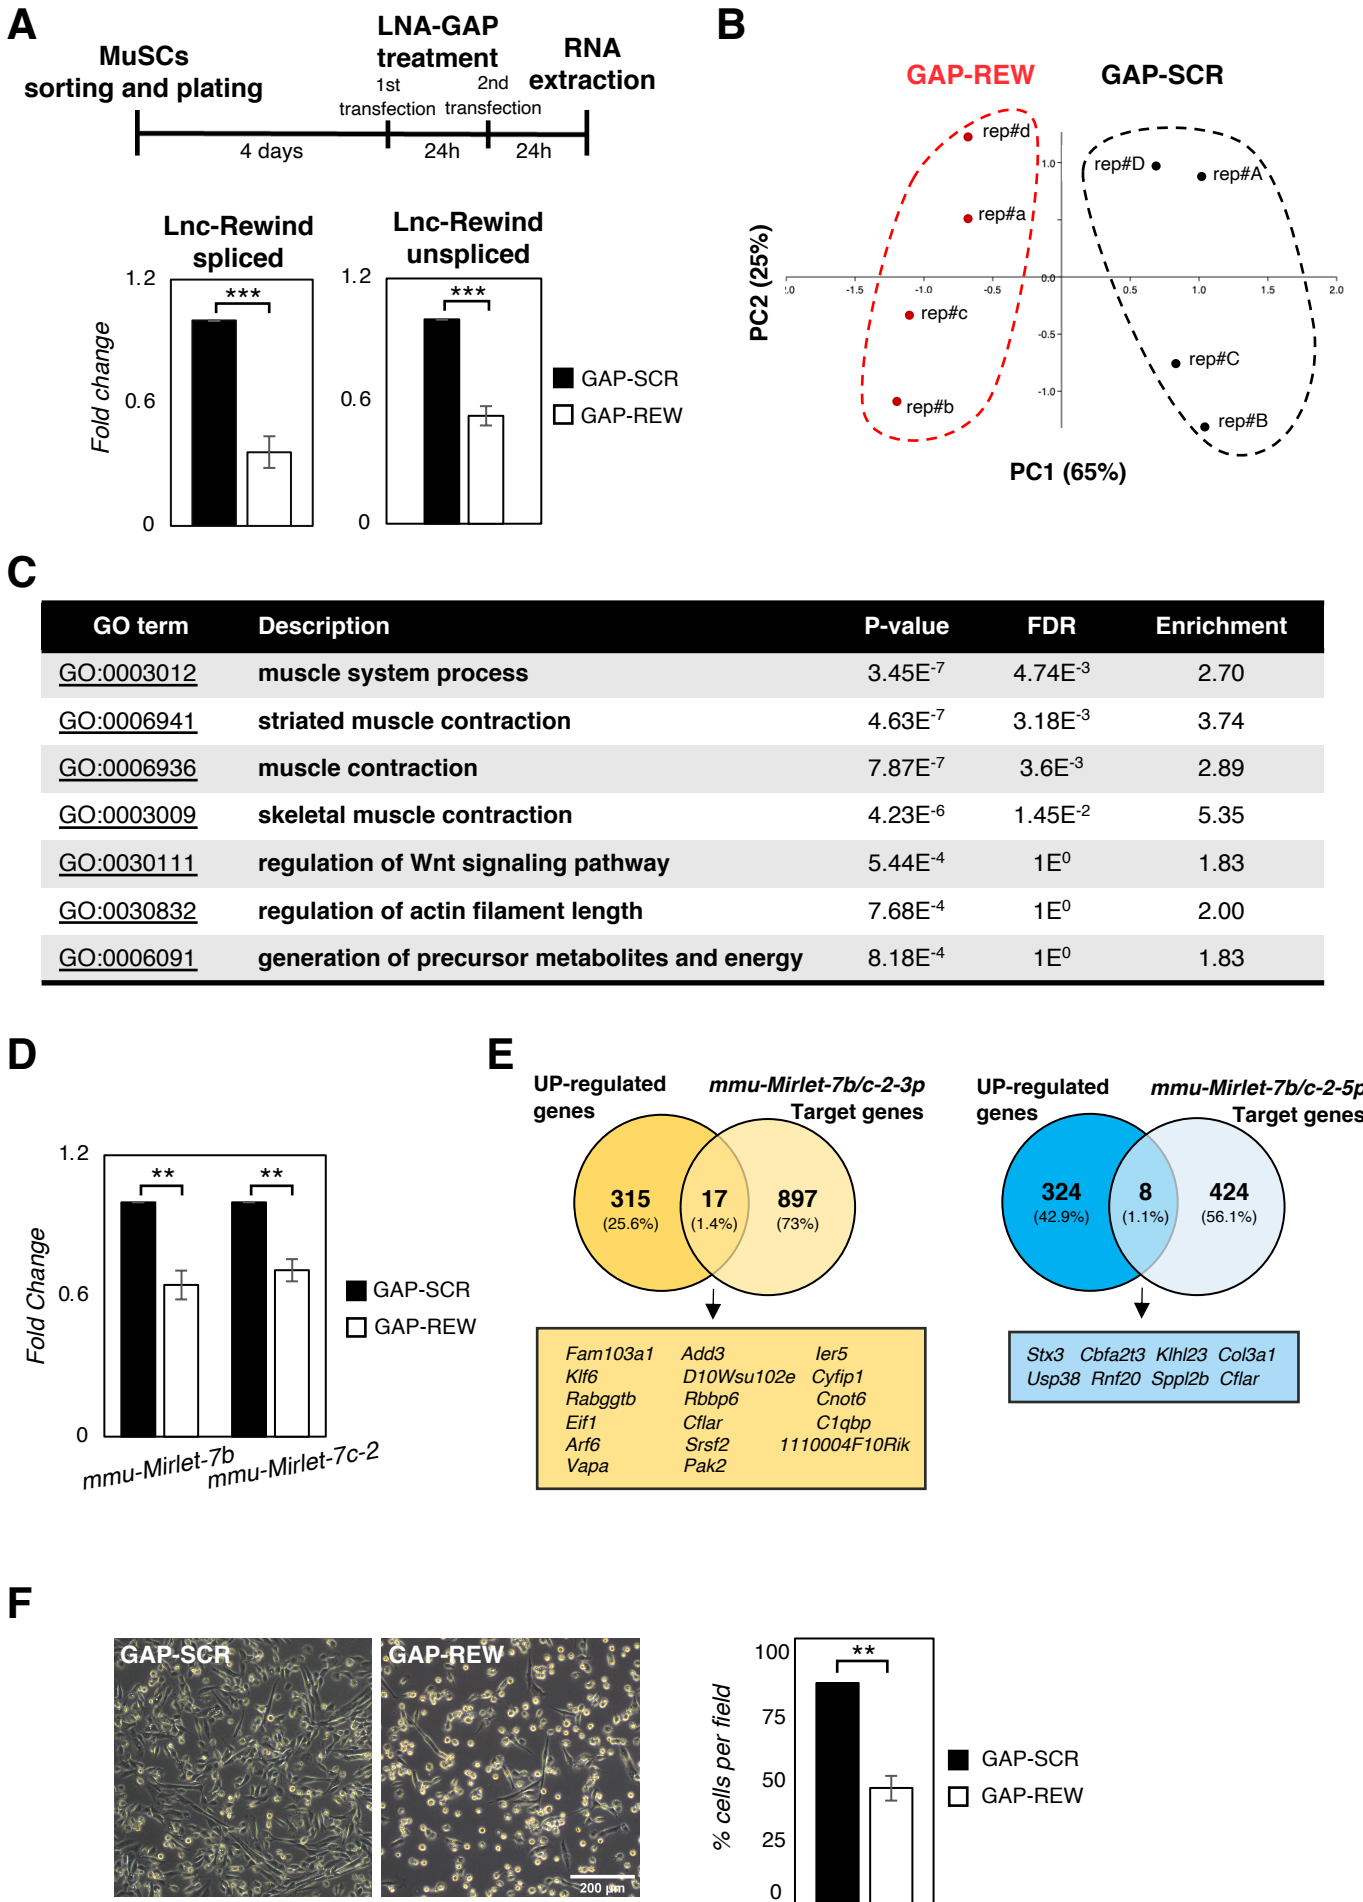

Supplement: supp [file elife-54782-supp-v1.zip]

Figure 1-figure supplement 1

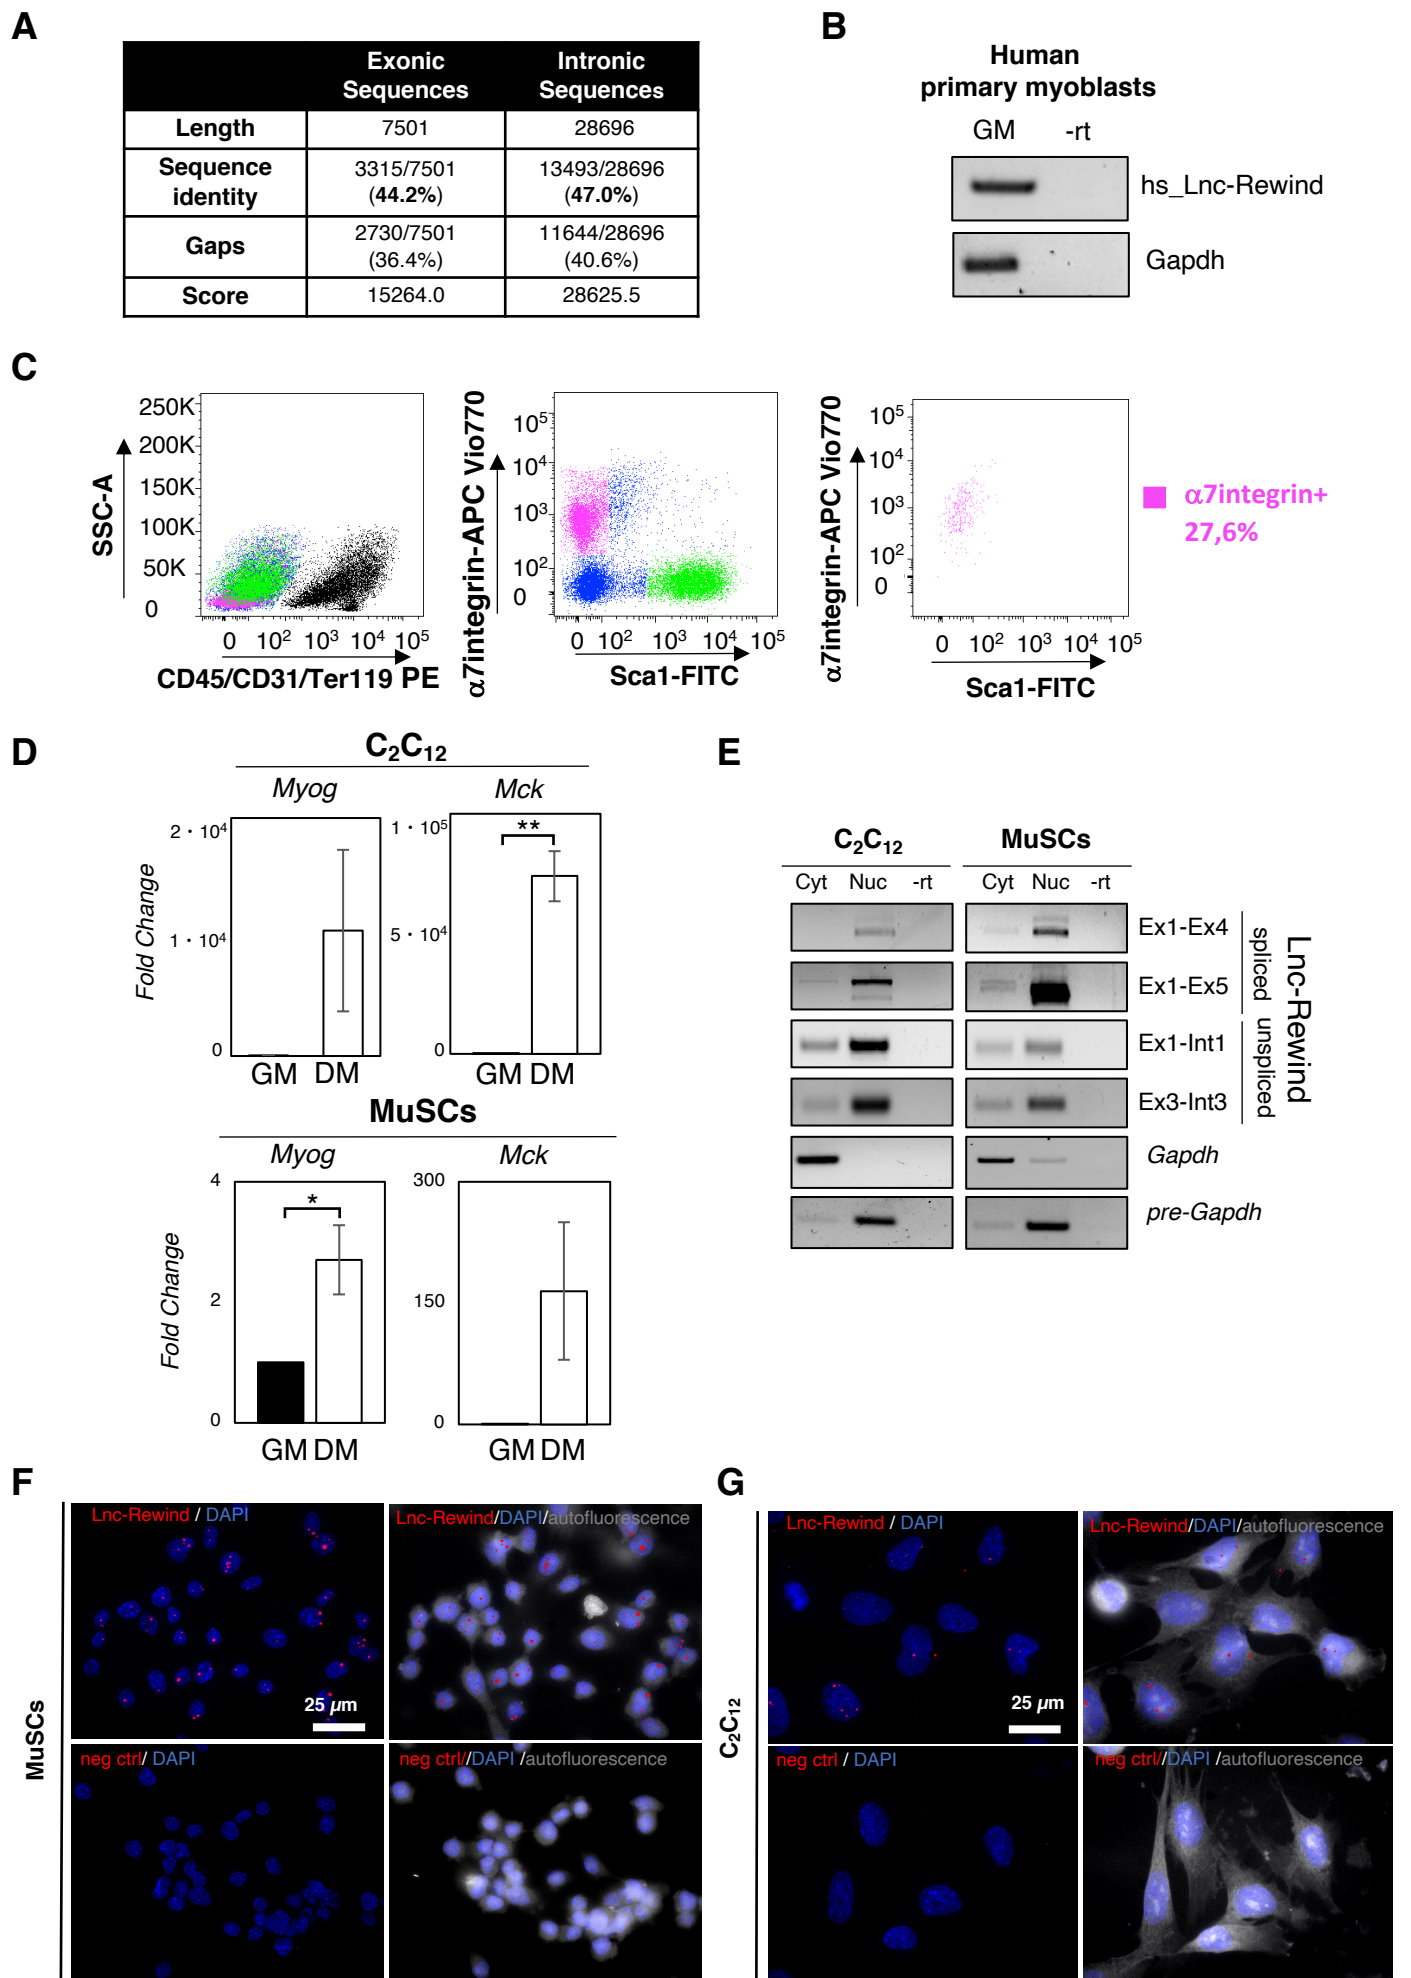

Supplement: supp [file elife-54782-supp-v1.zip]

Figure 4-figure supplement 1

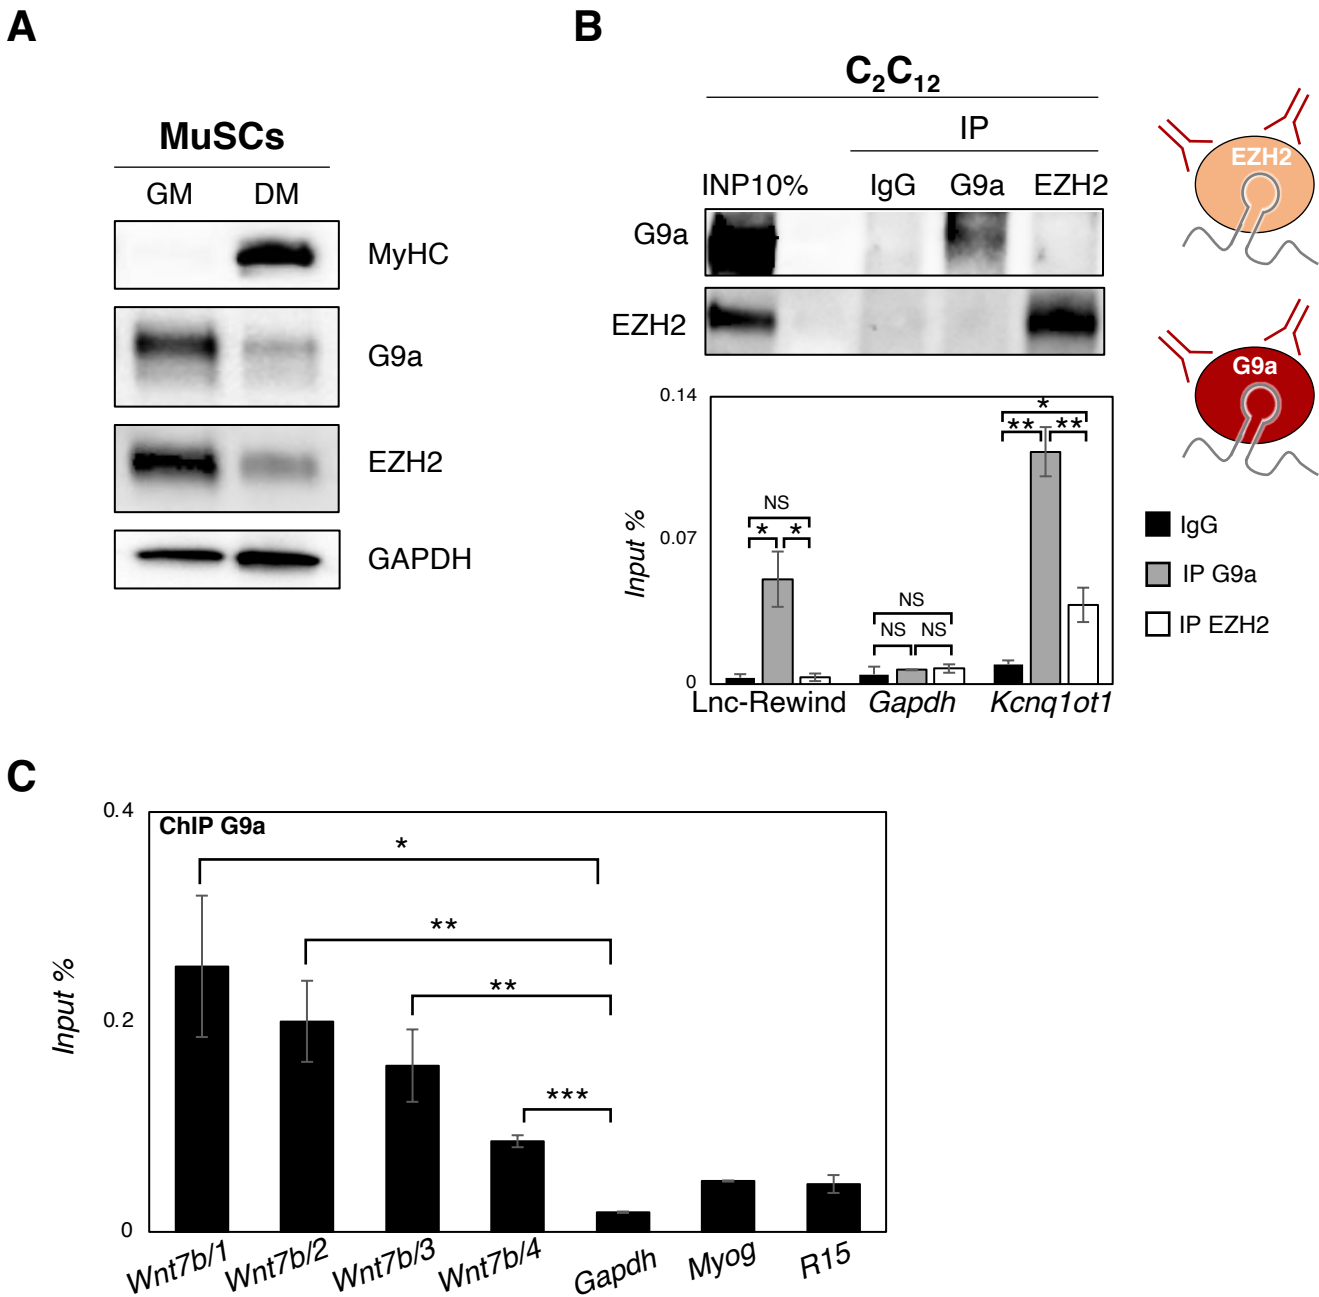

Supplement: supp [file elife-54782-supp-v1.zip]

Figure 3-figure supplement 1

A

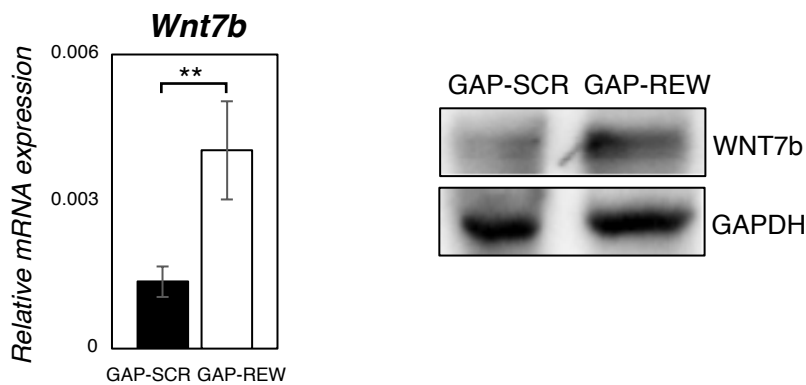

B

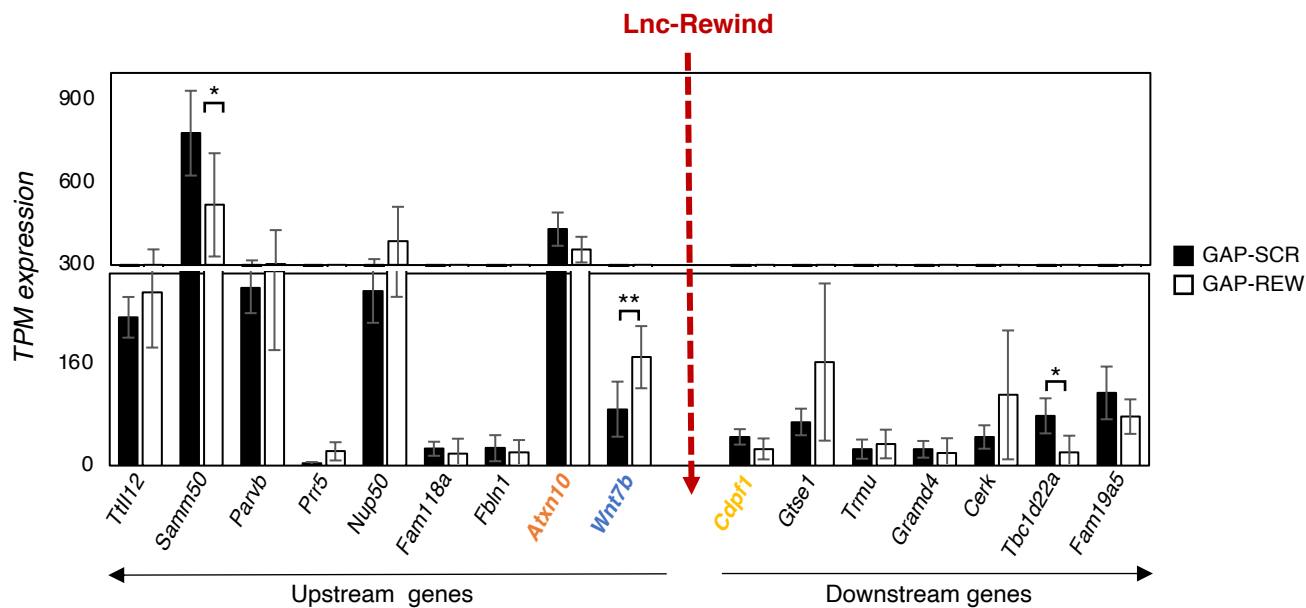

C

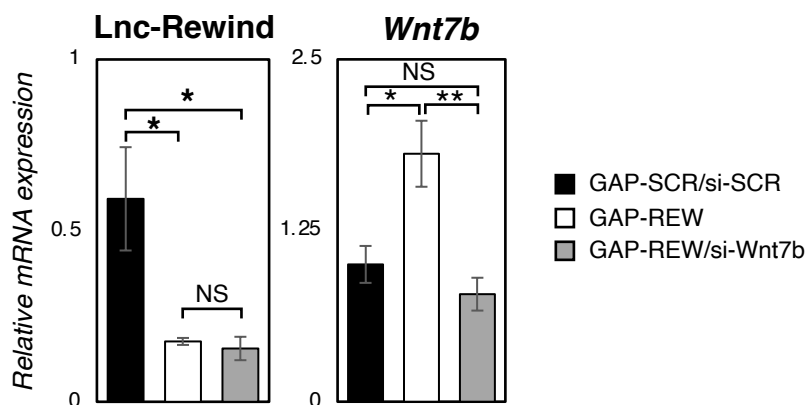

Supplement: supp [file elife-54782-supp-v1.zip]
